# Supplementary material
Source: PubMed Central journal article supplement (PMC4211954)
Supplement: NIHMS597313-supplement-2.pdf [file NIHMS597313-supplement-2.pdf]

**Table S1: LIST OF DOWN-REGULATED GENES IN THE PFC OF DA-D2RKO MICE**

| Gene Symbol   | gene_assignment                                                                   | p-value     | Fold-Change(KO vs. WT) |
|---------------|-----------------------------------------------------------------------------------|-------------|------------------------|
| G6pc3         | NM_175935 // G6pc3 // glucose 6 phosphatase, catalytic, 3 // 11 D // 68401 // E   | 0,000148709 | -1,22407               |
| A930017M01Rik | NR_033609 // A930017M01Rik // RIKEN cDNA A930017M01 gene // 15 B3.3 // 239410     | 0,000158506 | -1,20468               |
| Mr1           | NM_008209 // Mr1 // major histocompatibility complex, class I-related // 1 H1 //  | 0,000258091 | -1,36998               |
| Wipi1         | NM_145940 // Wipi1 // WD repeat domain, phosphoinositide interacting 1 // 11 E1   | 0,000290604 | -1,21926               |
| Tcf7          | NM_009331 // Tcf7 // transcription factor 7, T-cell specific // 11 B1.3 11 28.0   | 0,000395509 | -1,21698               |
| Ednra         | NM_010332 // Ednra // endothelin receptor type A // --- // 13617 // ENSMUST0000   | 0,000415646 | -1,2666                |
| Epc1          | NM_007935 // Epc1 // enhancer of polycomb homolog 1 (Drosophila) // 18 A1 // 138  | 0,000478731 | -1,21917               |
| Epha3         | NM_010140 // Epha3 // Eph receptor A3 // 16 C1.3 // 13837 // ENSMUST00000064405   | 0,00048329  | -1,23184               |
| Fcgr2b        | NM_001077189 // Fcgr2b // Fc receptor, IgG, low affinity IIb // 1 H3 1 92.3 cM /  | 0,000565217 | -1,31127               |
| Disp1         | NM_026866 // Disp1 // dispatched homolog 1 (Drosophila) // 1 1 101.2 cM // 68897  | 0,000592127 | -1,45478               |
| Psd           | NM_028627 // Psd // pleckstrin and Sec7 domain containing // 19 C3 19 45.8 cM //  | 0,000628026 | -1,26944               |
| Pard6g        | NM_053117 // Pard6g // par-6 partitioning defective 6 homolog gamma (C. elegans)  | 0,000649027 | -1,29439               |
| Tjp2          | NM_011597 // Tjp2 // tight junction protein 2 // --- // 21873 // ENSMUST0000009   | 0,000709161 | -1,20024               |
| Notch2        | NM_010928 // Notch2 // Notch gene homolog 2 (Drosophila) // 3 F2.2 3 45.6 cM //   | 0,000738856 | -1,3679                |
| Tns1          | NM_027884 // Tns1 // tensin 1 // 1 C3 1 44.5 cM // 21961 // BC055076 // Tns1 //   | 0,00077211  | -1,37513               |
| Tnfrsf19      | NM_013869 // Tnfrsf19 // tumor necrosis factor receptor superfamily, member 19 /  | 0,000792914 | -1,293                 |
| Slc14a1       | NM_001171010 // Slc14a1 // solute carrier family 14 (urea transporter), member 1  | 0,000853565 | -1,23916               |
| Arid5b        | NM_023598 // Arid5b // AT rich interactive domain 5B (MRF1-like) // 10 B5.1 // 7  | 0,000873975 | -1,28436               |
| Tm7sf3        | NM_026281 // Tm7sf3 // transmembrane 7 superfamily member 3 // 6 G3 // 67623 //   | 0,000902454 | -1,21691               |
| Dclre1b       | NM_133865 // Dclre1b // DNA cross-link repair 1B, PSO2 homolog (S. cerevisiae) /  | 0,00092607  | -1,25379               |
| Prkca         | NM_011101 // Prkca // protein kinase C, alpha // 11 E1 11 68.0 cM // 18750 // E   | 0,00108199  | -1,35925               |
| Kdm3b         | NM_001081256 // Kdm3b // KDM3B lysine (K)-specific demethylase 3B // 18 B3 // 27  | 0,00113688  | -1,26155               |
| Eps8          | NM_007945 // Eps8 // epidermal growth factor receptor pathway substrate 8 // 6 G  | 0,00116965  | -1,35172               |
| Slc7a2        | NM_007514 // Slc7a2 // solute carrier family 7 (cationic amino acid transporter,  | 0,00124824  | -1,27893               |
| Fgfr2         | NM_010207 // Fgfr2 // fibroblast growth factor receptor 2 // 7 F3 // 14183 // N   | 0,00127868  | -1,2764                |
| Mllt1         | NM_022328 // Mllt1 // myeloid/lymphoid or mixed-lineage leukemia (trithorax homo  | 0,00129391  | -1,30277               |
| Atp11a        | NM_015804 // Atp11a // ATPase, class VI, type 11A // 8 A2 // 50770 // ENSMUST00   | 0,00132261  | -1,2387                |
| Bbx           | NM_027444 // Bbx // bobby sox homolog (Drosophila) // 16 B5 // 70508 // ENSMUST   | 0,00132991  | -1,21112               |
| Plexn2        | NM_138749 // Plexn2 // plexin B2 // 15 43.0 cM // 140570 // NM_001159521 // Plx   | 0,00133207  | -1,32511               |
| Adamts3       | NM_177872 // Adamts3 // a disintegrin-like and metalloproteinase (reprolysin type | 0,00133484  | -1,29885               |
| Arhgap31      | NM_020260 // Arhgap31 // Rho GTPase activating protein 31 // 16 B4 // 12549 //    | 0,0013674   | -1,24063               |
| Syne1         | NM_001079686 // Syne1 // synaptic nuclear envelope 1 // 10 A1 // 64009 // NM_02   | 0,00142355  | -1,26119               |
| Ism1          | NM_001126490 // Ism1 // isthmin 1 homolog (zebrafish) // 2 F3 // 319909 // ENSM   | 0,0014266   | -1,21774               |
| Esam          | NM_027102 // Esam // endothelial cell-specific adhesion molecule // 9 B // 69524  | 0,00145534  | -1,23874               |
| Ltpb4         | NM_175641 // Ltpb4 // latent transforming growth factor beta binding protein 4 /  | 0,00149492  | -1,39778               |
| Edn3          | NM_007903 // Edn3 // endothelin 3 // 2 H4 2 104.0 cM // 13616 // ENSMUST0000002   | 0,00151736  | -1,27716               |
| Syne1         | NM_001079686 // Syne1 // synaptic nuclear envelope 1 // 10 A1 // 64009 // NM_15   | 0,00157739  | -1,24576               |
| Fam124a       | ENSMUST00000039064 // Fam124a // family with sequence similarity 124, member A /  | 0,00165532  | -1,23302               |
| Med16         | NM_198107 // Med16 // mediator complex subunit 16 // 10 C1 // 216154 // NM_0011   | 0,00167175  | -1,28843               |
| Myo10         | NM_019472 // Myo10 // myosin X // 15 C 15 9.2 cM // 17909 // ENSMUST00000110457   | 0,00171675  | -1,22423               |
| Fat4          | NM_183221 // Fat4 // FAT tumor suppressor homolog 4 (Drosophila) // 3 B // 32962  | 0,00174681  | -1,41847               |

|               |                                                                                   |            |          |
|---------------|-----------------------------------------------------------------------------------|------------|----------|
| Pkig          | NM_001039390 // Pkig // protein kinase inhibitor, gamma // 2 H3 2 94.0 cM // 187  | 0,00175779 | -1,25524 |
| Ankrd6        | NM_001012450 // Ankrd6 // ankyrin repeat domain 6 // 4 A5 // 140577 // NM_08047   | 0,00177757 | -1,252   |
| Eng           | NM_001146350 // Eng // endoglin // 2 B 2 21.4 cM // 13805 // NM_007932 // Eng /   | 0,00178196 | -1,29617 |
| Cbs           | NM_144855 // Cbs // cystathionine beta-synthase // 17 A-C 17 17.4 cM // 12411 //  | 0,00182902 | -1,23337 |
| Bmp7          | NM_007557 // Bmp7 // bone morphogenetic protein 7 // 2 H3 2 102.0 cM // 12162 //  | 0,00187238 | -1,45275 |
| Lrrc16a       | NM_026825 // Lrrc16a // leucine rich repeat containing 16A // 13 A3.2 // 68732 /  | 0,00187496 | -1,27935 |
| Padi2         | NM_008812 // Padi2 // peptidyl arginine deiminase, type II // 4 E1 4 71.0 cM //   | 0,00189886 | -1,30748 |
| Bcan          | NM_007529 // Bcan // brevicin // 3 F1 3 42.7 cM // 12032 // NM_001109758 // Bca   | 0,00190438 | -1,35348 |
| Lonrf3        | NM_028894 // Lonrf3 // LON peptidase N-terminal domain and ring finger 3 // X A2  | 0,00191865 | -1,21302 |
| Naaladl2      | ENSMUST00000099184 // Naaladl2 // N-acetylated alpha-linked acidic dipeptidase-I  | 0,00194887 | -1,31112 |
| Fbln5         | NM_011812 // Fbln5 // fibulin 5 // 12 F1 // 23876 // ENSMUST00000021603 // Fbln   | 0,00195431 | -1,22947 |
| Eya1          | NM_010164 // Eya1 // eyes absent 1 homolog (Drosophila) // 1 A3 1 10.4 cM // 140  | 0,00195943 | -1,23656 |
| Crtc1         | NM_001004062 // Crtc1 // CREB regulated transcription coactivator 1 // 8 B3.3 //  | 0,00196767 | -1,30857 |
| Rbm15b        | ENSMUST00000098424 // Rbm15b // RNA binding motif protein 15B // 9 F1 // 109095   | 0,00197424 | -1,22381 |
| Ctdsp1        | NM_153088 // Ctdsp1 // CTD (carboxy-terminal domain, RNA polymerase II, polypept  | 0,00200082 | -1,35768 |
| Fgfr1         | NM_010206 // Fgfr1 // fibroblast growth factor receptor 1 // 8 A2 8 10.0 cM // 1  | 0,00201688 | -1,42545 |
| Ltbp1         | NM_019919 // Ltbp1 // latent transforming growth factor beta binding protein 1 /  | 0,00201821 | -1,22203 |
| Epb4.1l2      | NM_013511 // Epb4.1l2 // erythrocyte protein band 4.1-like 2 // 10 A4 10 18.0 cM  | 0,00203823 | -1,20472 |
| A930011G23Rik | NR_030692 // A930011G23Rik // RIKEN cDNA A930011G23 gene // 5 E3-E4 // 319818     | 0,00217371 | -1,20404 |
| Naaa          | NM_025972 // Naaa // N-acyl ethanolamine acid amidase // 5 E3 // 67111 // NM_001  | 0,00219192 | -1,36005 |
| Slc6a6        | NM_009320 // Slc6a6 // solute carrier family 6 (neurotransmitter transporter, ta  | 0,00220973 | -1,30212 |
| Dennd5a       | NM_021494 // Dennd5a // DENN/MADD domain containing 5A // 7 F1 // 19347 // ENSM   | 0,00221972 | -1,24557 |
| Adamts3       | NM_177872 // Adamts3 // a disintegrin-like and metalloproteinase (reprolysin type | 0,00228917 | -1,34635 |
| Myd88         | NM_010851 // Myd88 // myeloid differentiation primary response gene 88 // 9 F3 9  | 0,00230357 | -1,20905 |
| Acsf2         | NM_153807 // Acsf2 // acyl-CoA synthetase family member 2 // 11 D // 264895 //    | 0,00237804 | -1,24692 |
| Gatad2a       | NM_145596 // Gatad2a // GATA zinc finger domain containing 2A // 8 B3.3 // 23436  | 0,00242653 | -1,20386 |
| Rapgef3       | NM_001177810 // Rapgef3 // Rap guanine nucleotide exchange factor (GEF) 3 // 15   | 0,00244172 | -1,29957 |
| Tbc1d23       | NM_026254 // Tbc1d23 // TBC1 domain family, member 23 // 16 C1.1 // 67581 // EN   | 0,0024521  | -1,20834 |
| Egfl7         | NM_198724 // Egfl7 // EGF-like domain 7 // 2 B // 353156 // NM_178444 // Egfl7    | 0,00246427 | -1,21695 |
| Sufu          | NM_015752 // Sufu // suppressor of fused homolog (Drosophila) // 19 C3 19 47.0 c  | 0,00246761 | -1,25811 |
| Lamb2         | NM_008483 // Lamb2 // laminin, beta 2 // 9 F1 9 60.0 cM // 16779 // ENSMUST0000   | 0,00246947 | -1,23387 |
| Zbtb20        | NM_019778 // Zbtb20 // zinc finger and BTB domain containing 20 // 16 B4 16 28.9  | 0,00248856 | -1,38739 |
| Entpd5        | NM_001026214 // Entpd5 // ectonucleoside triphosphate diphosphohydrolase 5 // 12  | 0,00249458 | -1,2105  |
| Gm6946        | XR_033648 // Gm6946 // glyceraldehyde-3-phosphate dehydrogenase pseudogene // 7   | 0,00253039 | -1,23464 |
| Fam19a5       | NM_134096 // Fam19a5 // family with sequence similarity 19, member A5 // 15 E3 /  | 0,0025805  | -1,35292 |
| Epn1          | NM_010147 // Epn1 // epsin 1 // 7 A1 // 13854 // ENSMUST00000098845 // Epn1 //    | 0,00260223 | -1,28712 |
| Raf1          | NM_029780 // Raf1 // v-raf-leukemia viral oncogene 1 // 6 52.5 cM // 110157 //    | 0,00267773 | -1,21539 |
| Tinagl1       | NM_023476 // Tinagl1 // tubulointerstitial nephritis antigen-like 1 // 4 D3 // 9  | 0,00268275 | -1,22941 |
| Klhl5         | NM_175174 // Klhl5 // kelch-like 5 (Drosophila) // 5 C3.1 // 71778 // ENSMUST00   | 0,00269894 | -1,20349 |
| Ttyh1         | NM_021324 // Ttyh1 // tweety homolog 1 (Drosophila) // 7 A1 // 57776 // NM_0010   | 0,00271474 | -1,24239 |
| Cic           | NM_027882 // Cic // capicua homolog (Drosophila) // 7 A3 // 71722 // NM_0011101   | 0,00272501 | -1,34047 |
| Ptprb         | NM_029928 // Ptprb // protein tyrosine phosphatase, receptor type, B // 10 D2 //  | 0,00272808 | -1,30981 |
| Anbx1         | NM_054041 // Anbx1 // anthrax toxin receptor 1 // 6 D1 // 69538 // ENSMUST0000    | 0,0027346  | -1,31597 |
| Lrp4          | NM_172668 // Lrp4 // low density lipoprotein receptor-related protein 4 // 2 E1   | 0,00273668 | -1,29395 |
| Cobll1        | NM_177025 // Cobll1 // Cobl-like 1 // 2 C3 // 319876 // NM_027225 // Cobll1 //    | 0,00279115 | -1,23772 |

|          |                                                                                  |            |          |
|----------|----------------------------------------------------------------------------------|------------|----------|
| Ilgav    | NM_008402 // Ilgav // integrin alpha V // 2 D 2 46.0 cM // 16410 /// ENSMUST0000 | 0,00286142 | -1,25023 |
| Zfp777   | NM_001081382 // Zfp777 // zinc finger protein 777 // 6 B2.3 // 72306 /// ENSMUST | 0,00287281 | -1,24644 |
| Limd1    | NM_013860 // Limd1 // LIM domains containing 1 // 9 F 9 70.7 cM // 29806 /// ENS | 0,00288833 | -1,23165 |
| Pde4d    | NM_011056 // Pde4d // phosphodiesterase 4D, cAMP specific // 13 D2.1-D2.2 // 238 | 0,00294741 | -1,3037  |
| Scn3a    | NM_018732 // Scn3a // sodium channel, voltage-gated, type III, alpha // 2 C1.3 2 | 0,00296442 | -1,26079 |
| Ncdn     | NM_011986 // Ncdn // neurochondrin // 4 D2.1 // 26562 /// ENSMUST00000030637 //  | 0,00297635 | -1,22478 |
| Zfp148   | NM_011749 // Zfp148 // zinc finger protein 148 // 16 B3 16 21.1 cM // 22661 ///  | 0,00302766 | -1,25786 |
| Tns1     | NM_027884 // Tns1 // tensin 1 // 1 C3 1 44.5 cM // 21961 /// ENSMUST00000050681  | 0,00306096 | -1,26667 |
| Afap112  | NM_146102 // Afap112 // actin filament associated protein 1-like 2 // 19 D2 // 2 | 0,00307692 | -1,21368 |
| Diap1    | NM_007858 // Diap1 // diaphanous homolog 1 (Drosophila) // 18 B3 18 16.0 cM // 1 | 0,00307821 | -1,27757 |
| Sun2     | NM_194342 // Sun2 // Sad1 and UNC84 domain containing 2 // 15 E1 // 223697 /// E | 0,00308473 | -1,23567 |
| Vwa3a    | NM_177697 // Vwa3a // von Willebrand factor A domain containing 3A // 7 F2 // 23 | 0,00308574 | -1,26418 |
| Tjp1     | NM_009386 // Tjp1 // tight junction protein 1 // 7 C 7 28.5 cM // 21872 /// NM_0 | 0,00310465 | -1,2241  |
| Dlx1as   | NR_002854 // Dlx1as // distal-less homeobox 1, antisense // 2 C2 2 44.0 cM // 11 | 0,00311387 | -1,24254 |
| Dusp22   | NM_001037955 // Dusp22 // dual specificity phosphatase 22 // 13 A3.2 // 105352 / | 0,00313962 | -1,25489 |
| Cacnb1   | NM_031173 // Cacnb1 // calcium channel, voltage-dependent, beta 1 subunit // 11  | 0,00314879 | -1,31074 |
| Psmg4    | NM_001101430 // Psmg4 // proteasome (prosome, macropain) assembly chaperone 4 // | 0,00315496 | -1,25187 |
| Timp3    | NM_011595 // Timp3 // tissue inhibitor of metalloproteinase 3 // 10 C1-D1 10 47. | 0,00317366 | -1,37053 |
| Smarca1  | NM_020618 // Smarca1 // SWI/SNF related, matrix associated, actin dependent regu | 0,00317569 | -1,2292  |
| Zfp385a  | NM_013866 // Zfp385a // zinc finger protein 385A // 15 F3 // 29813 /// ENSMUST00 | 0,0031831  | -1,30212 |
| Elovl7   | NM_029001 // Elovl7 // ELOVL family member 7, elongation of long chain fatty aci | 0,00321167 | -1,28126 |
| Rbm42    | NM_133693 // Rbm42 // RNA binding motif protein 42 // 7 B1 // 68035 /// ENSMUST0 | 0,00326098 | -1,20765 |
| Acsf2    | NM_153807 // Acsf2 // acyl-CoA synthetase family member 2 // 11 D // 264895 ///  | 0,00330038 | -1,29018 |
| Pla2g4e  | NM_177845 // Pla2g4e // phospholipase A2, group IVE // 2 E5 // 329502 /// ENSMUS | 0,00330094 | -1,37483 |
| Ngf      | NM_013609 // Ngf // nerve growth factor // 3 F2.2 3 48.5 cM // 18049 /// NM_0011 | 0,00330152 | -1,22762 |
| Epb4.115 | NM_145506 // Epb4.115 // erythrocyte protein band 4.1-like 5 // 1 E2.3 // 226352 | 0,00332951 | -1,21478 |
| Heg1     | NM_175256 // Heg1 // HEG homolog 1 (zebrafish) // 16 B3 // 77446 /// ENSMUST0000 | 0,00333107 | -1,27446 |
| Sntg2    | NM_172951 // Sntg2 // syntrophin, gamma 2 // 12 B1 // 268534 /// ENSMUST00000021 | 0,00333112 | -1,20836 |
| Mgn1     | NM_029657 // Mgn1 // mahogunin, ring finger 1 // 16 A1 16 2.0 cM // 17237 /// B  | 0,00333174 | -1,29176 |
| Tmem134  | NM_001078649 // Tmem134 // transmembrane protein 134 // 19 A // 66990 /// NM_025 | 0,00334785 | -1,24308 |
| Rps6ka2  | NM_011299 // Rps6ka2 // ribosomal protein S6 kinase, polypeptide 2 // 17 F4 17 3 | 0,0033604  | -1,28779 |
| Usp54    | NM_030180 // Usp54 // ubiquitin specific peptidase 54 // 14 A3 // 78787 /// ENSM | 0,00339154 | -1,2105  |
| Hsd12    | NM_024255 // Hsd12 // hydroxysteroid dehydrogenase like 2 // 4 C1 // 72479 /// E | 0,00340671 | -1,23613 |
| Htr3a    | NM_013561 // Htr3a // 5-hydroxytryptamine (serotonin) receptor 3A // 9 A5.3 // 1 | 0,00342737 | -1,20069 |
| Dguok    | NM_013764 // Dguok // deoxyguanosine kinase // 6 C3 6 35.0 cM // 27369 /// NM_00 | 0,00343082 | -1,21238 |
| ErbB4    | NM_010154 // ErbB4 // v-erb-a erythroblastic leukemia viral oncogene homolog 4 ( | 0,00344167 | -1,25416 |
| Fzd4     | NM_008055 // Fzd4 // frizzled homolog 4 (Drosophila) // 7 E1 7 44.5 cM // 14366  | 0,00344708 | -1,20146 |
| Anapc1   | NM_008569 // Anapc1 // anaphase promoting complex subunit 1 // 2 F3 // 17222 /// | 0,00346648 | -1,24271 |
| Rxrb     | NM_011306 // Rxrb // retinoid X receptor beta // 17 B1 17 18.49 cM // 20182 ///  | 0,00347744 | -1,2355  |
| Cpt1a    | NM_013495 // Cpt1a // carnitine palmitoyltransferase 1a, liver // 19 A 19 2.0 cM | 0,00353842 | -1,3137  |
| Mrip     | NM_012027 // Mrip // myosin phosphatase Rho interacting protein // 11 B1.3 // 2  | 0,00357751 | -1,21843 |
| Stat3    | NM_213659 // Stat3 // signal transducer and activator of transcription 3 // 11 D | 0,00359315 | -1,24382 |
| Numa1    | NM_133947 // Numa1 // nuclear mitotic apparatus protein 1 // 7 E3 // 101706 ///  | 0,00362494 | -1,21893 |
| Stard8   | NM_199018 // Stard8 // START domain containing 8 // X C3 // 236920 /// ENSMUST00 | 0,00363515 | -1,25726 |
| Slc4a3   | NM_009208 // Slc4a3 // solute carrier family 4 (anion exchanger), member 3 // 1  | 0,00364227 | -1,26319 |

|               |                                                                                   |            |          |
|---------------|-----------------------------------------------------------------------------------|------------|----------|
| Dock1         | NM_001033420 // Dock1 // dedicator of cytokinesis 1 // 7 F3 // 330662 /// ENSMUS  | 0,00368188 | -1,23845 |
| Pitpnm1       | NM_008851 // Pitpnm1 // phosphatidylinositol transfer protein, membrane-associat  | 0,00370647 | -1,29744 |
| Hhahl         | NM_029095 // Hhahl // hedgehog acyltransferase-like // 9 F4 // 74770 /// NR_0279  | 0,00375589 | -1,22313 |
| Crtap         | NM_019922 // Crtap // cartilage associated protein // 9 F3-F4 // 56693 /// ENSMU  | 0,00378341 | -1,21221 |
| Pcx           | NM_001162946 // Pcx // pyruvate carboxylase // 19 A 19 0.0 cM // 18563 /// NM_00  | 0,00381636 | -1,3115  |
| Otof          | NM_031875 // Otof // otoferlin // --- // 83762 /// NM_001100395 // Otof // otofe  | 0,00381924 | -1,26331 |
| Lcat          | NM_008490 // Lcat // lecithin cholesterol acyltransferase // 8 D3 8 53.0 cM // 1  | 0,00383968 | -1,38794 |
| Pcdhga12      | NM_033595 // Pcdhga12 // protocadherin gamma subfamily A, 12 // 18 C // 93724 //  | 0,00386397 | -1,2668  |
| Rgs12         | NM_173402 // Rgs12 // regulator of G-protein signaling 12 // 5 B2 5 20.0 cM // 7  | 0,00389499 | -1,28084 |
| Ppp4r1        | NM_146081 // Ppp4r1 // protein phosphatase 4, regulatory subunit 1 // 17 E1.2 //  | 0,00394358 | -1,24827 |
| B3gat1        | NM_029792 // B3gat1 // beta-1,3-glucuronyltransferase 1 (glucuronosyltransferase  | 0,0039507  | -1,26758 |
| Lrp5          | NM_008513 // Lrp5 // low density lipoprotein receptor-related protein 5 // 19 B   | 0,00396876 | -1,21103 |
| Asrgl1        | NM_025610 // Asrgl1 // asparaginase like 1 // 19 A // 66514 /// ENSMUST000000499  | 0,00397168 | -1,22094 |
| Gm            | NM_008175 // Gm // granulin // 11 D 11 60.0 cM // 14824 /// ENSMUST0000004960     | 0,00405055 | -1,2232  |
| Saps2         | NM_026813 // Saps2 // SAPS domain family, member 2 // 15 F1 // 71474 /// NM_0278  | 0,00406071 | -1,23702 |
| Slc2a1        | NM_011400 // Slc2a1 // solute carrier family 2 (facilitated glucose transporter)  | 0,00411305 | -1,27815 |
| Zfp523        | NM_172617 // Zfp523 // zinc finger protein 523 // 17 A.3 // 224656 /// ENSMUST0   | 0,00411652 | -1,23103 |
| Foxo1         | NM_019739 // Foxo1 // forkhead box O1 // 3 C 3 22.5 cM // 56458 /// ENSMUST000000 | 0,00416053 | -1,31575 |
| Dvl2          | NM_007888 // Dvl2 // dishevelled 2, dsh homolog (Drosophila) // 11 B3 11 36.5 cM  | 0,00416127 | -1,2229  |
| Sdc4          | NM_011521 // Sdc4 // syndecan 4 // 2 H3 2 94.0 cM // 20971 /// ENSMUST0000001715  | 0,00416765 | -1,22923 |
| Fubp1         | NM_057172 // Fubp1 // far upstream element (FUSE) binding protein 1 // 3 H3 3 70  | 0,00418462 | -1,22927 |
| Hnmp3         | NM_001079824 // Hnmp3 // heterogeneous nuclear ribonucleoprotein H3 // 10 B4 /    | 0,0041972  | -1,20647 |
| Syngap1       | XM_985548 // Syngap1 // synaptic Ras GTPase activating protein 1 homolog (rat) /  | 0,00420991 | -1,28085 |
| Zfp3612       | NM_001001806 // Zfp3612 // zinc finger protein 36, C3H type-like 2 // 17 E4 // 1  | 0,00421466 | -1,28539 |
| Igsf11        | NM_170599 // Igsf11 // immunoglobulin superfamily, member 11 // 16 B4 // 207683   | 0,00422158 | -1,26492 |
| Bmp1          | NR_033241 // Bmp1 // bone morphogenetic protein 1 // 14 D2 14 32.5 cM // 12153 /  | 0,00423696 | -1,2311  |
| Tmem168       | NM_028990 // Tmem168 // transmembrane protein 168 // 6 A2 // 101118 /// ENSMUST0  | 0,00424474 | -1,21018 |
| Tbc1d17       | NM_001042655 // Tbc1d17 // TBC1 domain family, member 17 // 7 B4 // 233204 /// E  | 0,0043077  | -1,24867 |
| Smurf2        | NM_025481 // Smurf2 // SMAD specific E3 ubiquitin protein ligase 2 // 11 E1 // 6  | 0,00432105 | -1,2783  |
| Kdm4a         | NM_001161823 // Kdm4a // lysine (K)-specific demethylase 4A // 4 D2.1 4 56.5 cM   | 0,00433033 | -1,25318 |
| Cdc14a        | NM_001080818 // Cdc14a // CDC14 cell division cycle 14 homolog A (S. cerevisiae)  | 0,00433059 | -1,23812 |
| Tead1         | NM_001166584 // Tead1 // TEA domain family member 1 // 7 F2 // 21676 /// NM_0093  | 0,00434263 | -1,40455 |
| Pecam1        | NM_008816 // Pecam1 // platelet/endothelial cell adhesion molecule 1 // 11 E1 //  | 0,00434956 | -1,20105 |
| Gramd4        | NM_172611 // Gramd4 // GRAM domain containing 4 // 15 E2 // 223752 /// ENSMUST00  | 0,0043579  | -1,2114  |
| Rdh10         | NM_133832 // Rdh10 // retinol dehydrogenase 10 (all-trans) // 1 A3 1 12.0 cM //   | 0,00436041 | -1,21243 |
| Tcof1         | NM_011552 // Tcof1 // Treacher Collins Franceschetti syndrome 1, homolog // 18 E  | 0,00437316 | -1,24539 |
| Tspan9        | NM_175414 // Tspan9 // tetraspanin 9 // 6 F3 // 109246 /// ENSMUST00000112173 //  | 0,00438252 | -1,27461 |
| Grin2c        | NM_010350 // Grin2c // glutamate receptor, ionotropic, NMDA2C (epsilon 3) // 11   | 0,00440279 | -1,21046 |
| 4931406P16Rik | BC060233 // 4931406P16Rik // RIKEN cDNA 4931406P16 gene // 7 B1 // 233103 /// NM  | 0,00440302 | -1,264   |
| Ankrd11       | NM_001081379 // Ankrd11 // ankyrin repeat domain 11 // 8 E2 // 77087 /// ENSMUST  | 0,00441827 | -1,22309 |
| Gfra1         | NM_010279 // Gfra1 // glial cell line derived neurotrophic factor family recepto  | 0,00444301 | -1,26797 |
| Oaf           | NM_178644 // Oaf // OAF homolog (Drosophila) // 9 A5.1 9 23.0 cM // 102644 /// E  | 0,00446586 | -1,20692 |
| Pcsk6         | NM_011048 // Pcsk6 // proprotein convertase subtilisin/kexin type 6 // 7 C 7 28.  | 0,00447492 | -1,30899 |
| Zeb2          | NM_015753 // Zeb2 // zinc finger E-box binding homeobox 2 // 2 C1 // 24136 /// E  | 0,00449888 | -1,21325 |
| Mcc           | NM_001085373 // Mcc // mutated in colorectal cancers // 18 B3 18 21.0 cM // 3289  | 0,00450413 | -1,21544 |

|               |                                                                                     |            |          |
|---------------|-------------------------------------------------------------------------------------|------------|----------|
| Fibcd1        | NM_178887 // Fibcd1 // fibrinogen C domain containing 1 // 2 B // 98970 // ENSM     | 0,0045271  | -1,25279 |
| Cenpv         | NM_028448 // Cenpv // centromere protein V // 11 B2 // 73139 // ENSMUST00000018     | 0,00453449 | -1,22538 |
| Zfp142        | NM_029888 // Zfp142 // zinc finger protein 142 // 1 C3j1 41.5 cM // 77264 // EN     | 0,00454827 | -1,22942 |
| Rxra          | NM_011305 // Rxra // retinoid X receptor alpha // 2 A3j2 17.0 cM // 20181 // EN     | 0,00457672 | -1,21132 |
| Dip2c         | NM_001081426 // Dip2c // DIP2 disco-interacting protein 2 homolog C (Drosophila)    | 0,00460275 | -1,22483 |
| Rnf180        | NM_027934 // Rnf180 // ring finger protein 180 // 13 D1 // 71816 // ENSMUST0000     | 0,00461996 | -1,20677 |
| Phf17         | NM_172303 // Phf17 // PHD finger protein 17 // 3 B // 269424 // NM_001130184 //     | 0,00462679 | -1,20708 |
| Thra          | NM_178060 // Thra // thyroid hormone receptor alpha // 11 D-Ej11 57.0 cM // 2183    | 0,004632   | -1,25653 |
| Kitl          | NM_013598 // Kitl // kit ligand // 10 D1j10 57.0 cM // 17311 // ENSMUST0000105      | 0,00463343 | -1,32125 |
| Mttr3         | NM_028860 // Mttr3 // myotubularin related protein 3 // 11 A1 // 74302 // ENSMU     | 0,00463584 | -1,20947 |
| Chd7          | NM_001081417 // Chd7 // chromodomain helicase DNA binding protein 7 // 4 A1j4 1.    | 0,00463742 | -1,2889  |
| Pde4dip       | NM_001039376 // Pde4dip // phosphodiesterase 4D interacting protein (myomegalin)    | 0,00465638 | -1,25386 |
| Pde10a        | NM_011866 // Pde10a // phosphodiesterase 10A // 17 A1 // 23984 // ENSMUST000000     | 0,00473021 | -1,37353 |
| Kank1         | NM_181404 // Kank1 // KN motif and ankyrin repeat domains 1 // 19 B // 107351 //    | 0,00474955 | -1,22586 |
| Nr2f2         | NM_009697 // Nr2f2 // nuclear receptor subfamily 2, group F, member 2 // 7 D1j7     | 0,00475111 | -1,22023 |
| Nfia          | NM_001122952 // Nfia // nuclear factor I/A // 4 C4-C6j4 45.8 cM // 18027 // NM_     | 0,00481232 | -1,3215  |
| Zhx1          | NM_001042438 // Zhx1 // zinc fingers and homeoboxes 1 // --- // 22770 // NM_009     | 0,00482986 | -1,21854 |
| Syngap1       | NM_001042438 // Syngap1 // synaptic Ras GTPase activating protein 1 homolog (rat) / | 0,00484539 | -1,33873 |
| Gpr125        | NM_133911 // Gpr125 // G protein-coupled receptor 125 // 5 B3 // 70693 // ENSMU     | 0,00485267 | -1,25779 |
| Mxra8         | NM_024263 // Mxra8 // matrix-remodelling associated 8 // 4 E2j4 83.0 cM // 74761    | 0,00487515 | -1,2448  |
| Npc1          | NM_008720 // Npc1 // Niemann Pick type C1 // 18 A1j18 4.0 cM // 18145 // ENSMUS     | 0,00488165 | -1,28392 |
| Zfp106        | NM_011743 // Zfp106 // zinc finger protein 106 // 2 F1j2 67.2 cM // 20402 // EN     | 0,00488854 | -1,21324 |
| Shd           | NM_001159523 // Shd // src homology 2 domain-containing transforming protein D /    | 0,00489908 | -1,26113 |
| Moxd1         | NM_021509 // Moxd1 // monooxygenase, DBH-like 1 // 10 A3 // 59012 // ENSMUST000     | 0,0049657  | -1,31816 |
| Gfod2         | NM_027469 // Gfod2 // glucose-fructose oxidoreductase domain containing 2 // 8 D    | 0,00500529 | -1,2024  |
| Asb13         | NM_178283 // Asb13 // ankyrin repeat and SOCS box-containing 13 // 13 A1 // 1426    | 0,00508108 | -1,2067  |
| Daam2         | NM_001008231 // Daam2 // dishevelled associated activator of morphogenesis 2 //     | 0,00511794 | -1,31603 |
| Zfp579        | NM_026741 // Zfp579 // zinc finger protein 579 // 7 A1 // 68490 // ENSMUST00000     | 0,00512867 | -1,22202 |
| 1110021J02Rik | NM_001163741 // 1110021J02Rik // RIKEN cDNA 1110021J02 gene // 17 B1j17 // 68597    | 0,0051677  | -1,20592 |
| Ssfa2         | NM_080558 // Ssfa2 // sperm specific antigen 2 // 2 D // 70599 // ENSMUST000001     | 0,00517808 | -1,34557 |
| Slc16a4       | NM_146136 // Slc16a4 // solute carrier family 16 (monocarboxylic acid transporte    | 0,00518518 | -1,20222 |
| Alkbh3        | NM_026944 // Alkbh3 // alkB, alkylation repair homolog 3 (E. coli) // 2 E1 // 69    | 0,00519159 | -1,20153 |
| Prkd3         | NM_001171004 // Prkd3 // protein kinase D3 // 17 E3 // 75292 // NM_029239 // Pr     | 0,00519651 | -1,20684 |
| Dyrk1b        | NM_001037957 // Dyrk1b // dual-specificity tyrosine-(Y)-phosphorylation regulate    | 0,00520649 | -1,29918 |
| Snrk          | NM_133741 // Snrk // SNF related kinase // 9 F4 // 20623 // NM_001164572 // Snr     | 0,00523429 | -1,25725 |
| Kdm4b         | NM_172132 // Kdm4b // lysine (K)-specific demethylase 4B // 17 D // 193796 // E     | 0,00523641 | -1,23974 |
| Tab2          | NM_138667 // Tab2 // TGF-beta activated kinase 1/3/4 binding protein 2 // 10        | 0,00530803 | -1,26376 |
| Fam3a         | NM_025473 // Fam3a // family with sequence similarity 3, member A // X A6 // 662    | 0,00532521 | -1,22836 |
| Sash1         | NM_175155 // Sash1 // SAM and SH3 domain containing 1 // 10 A1 // 70097 // ENSM     | 0,00537677 | -1,27692 |
| Cmtm6         | NM_026036 // Cmtm6 // CKLF-like MARVEL transmembrane domain containing 6 // 9 F3    | 0,00540984 | -1,20909 |
| Kdm4c         | NM_144787 // Kdm4c // lysine (K)-specific demethylase 4C // 4 C3 // 76804 // NM     | 0,00541065 | -1,21047 |
| Cx3cr1        | NM_009987 // Cx3cr1 // chemokine (C-X3-C) receptor 1 // 9 F4 // 13051 // BC0126     | 0,00541073 | -1,26348 |
| Slc6a1        | NM_178703 // Slc6a1 // solute carrier family 6 (neurotransmitter transporter, GA    | 0,00541462 | -1,24793 |
| lck           | NM_019987 // lck // intestinal cell kinase // 9 E1 // 56542 // NM_001163780 //      | 0,00546158 | -1,21173 |
| Rinl          | NM_177158 // Rinl // Ras and Rab interactor-like // 7 A3 // 320435 // ENSMUST00     | 0,00550447 | -1,22186 |

|          |                                                                                  |            |          |
|----------|----------------------------------------------------------------------------------|------------|----------|
| Hip1     | NM_146001 // Hip1 // huntingtin interacting protein 1 // 5 F-G2 5 75.0 cM // 215 | 0,00551207 | -1,22966 |
| Zdhhc3   | NM_026917 // Zdhhc3 // zinc finger, DHHC domain containing 3 // 9 F4 // 69035 // | 0,00555112 | -1,21393 |
| Shisa9   | NM_028277 // Shisa9 // shisa homolog 9 (Xenopus laevis) // 16 B1 16 // 72555 //  | 0,00558678 | -1,32669 |
| Acot11   | NM_025590 // Acot11 // acyl-CoA thioesterase 11 // 4 C7 // 329910 // ENSMUST000  | 0,0055951  | -1,26782 |
| Ipo13    | NM_146152 // Ipo13 // importin 13 // 4 D2.1 // 230673 // ENSMUST00000036156 //   | 0,00561702 | -1,36365 |
| Pde5a    | NM_153422 // Pde5a // phosphodiesterase 5A, cGMP-specific // 3 G1 // 242202 //   | 0,005632   | -1,24398 |
| Ly6c1    | NM_010741 // Ly6c1 // lymphocyte antigen 6 complex, locus C1 // 15 D3 15 42.7 cM | 0,0056362  | -1,2421  |
| Smpdl3a  | NM_020561 // Smpdl3a // sphingomyelin phosphodiesterase, acid-like 3A // 10 B4 / | 0,00563658 | -1,28485 |
| Adipor2  | NM_197985 // Adipor2 // adiponectin receptor 2 // 6 F1 // 68465 // ENSMUST00000  | 0,00566262 | -1,20664 |
| Adamts3  | NM_177872 // Adamts3 // a disintegrin-like and metallopeptidase (reprolysin type | 0,00566833 | -1,29631 |
| Jam2     | NM_023844 // Jam2 // junction adhesion molecule 2 // 16 C3.3 // 67374 // ENSMUS  | 0,00569015 | -1,32076 |
| Mllt6    | NM_139311 // Mllt6 // myeloid/lymphoid or mixed-lineage leukemia (trithorax homo | 0,00571026 | -1,30607 |
| Setbp1   | NM_053099 // Setbp1 // SET binding protein 1 // 18 E3 // 240427 // ENSMUST00000  | 0,00576229 | -1,27047 |
| Snx29    | NM_028964 // Snx29 // sorting nexin 29 // 16 B1 // 74478 // ENSMUST00000096273   | 0,0058065  | -1,22429 |
| Brd2     | NM_001025387 // Brd2 // bromodomain containing 2 // 17 B1 17 18.53 cM // 14312 / | 0,00582873 | -1,24703 |
| Stard3   | NM_021547 // Stard3 // START domain containing 3 // 11 D // 59045 // ENSMUST000  | 0,00583525 | -1,22695 |
| Sdc3     | NM_011520 // Sdc3 // syndecan 3 // 4 D2.3 4 60.8 cM // 20970 // ENSMUST00000070  | 0,00584748 | -1,28237 |
| Zkscan1  | NM_133906 // Zkscan1 // zinc finger with KRAB and SCAN domains 1 // 5 G1 // 7457 | 0,00586825 | -1,21795 |
| Vprbp    | NM_001015507 // Vprbp // Vpr (HIV-1) binding protein // 9 F1 // 321006 // ENSMU  | 0,005896   | -1,28587 |
| Ilk      | NM_010562 // Ilk // integrin linked kinase // 7 E1 // 16202 // NM_001161724 //   | 0,00594942 | -1,24964 |
| Gpr37l1  | NM_134438 // Gpr37l1 // G protein-coupled receptor 37-like 1 // 1 E4 // 171469 / | 0,00594974 | -1,25514 |
| Zic3     | NM_009575 // Zic3 // zinc finger protein of the cerebellum 3 // X A6 X 16.5 cM / | 0,00600379 | -1,35275 |
| Dcaf10   | NM_153167 // Dcaf10 // DDB1 and CUL4 associated factor 10 // 4 B1 // 242418 //   | 0,00600547 | -1,22491 |
| Pitpnm3  | NM_001024927 // Pitpnm3 // PITPNM family member 3 // 11 B4 // 327958 // NM_0010  | 0,00601209 | -1,31059 |
| Chd7     | NM_001081417 // Chd7 // chromodomain helicase DNA binding protein 7 // 4 A1 4 1. | 0,00604719 | -1,23688 |
| Ppp1r16a | NM_033371 // Ppp1r16a // protein phosphatase 1, regulatory (inhibitor) subunit 1 | 0,00605469 | -1,23518 |
| Sfrp1    | NM_013834 // Sfrp1 // secreted frizzled-related protein 1 // 8 A2 8 9.5 cM // 20 | 0,00607886 | -1,53685 |
| Slc44a1  | NM_133891 // Slc44a1 // solute carrier family 44, member 1 // 4 B2 // 100434 //  | 0,0060974  | -1,2342  |
| Herc2    | NM_010418 // Herc2 // hect (homologous to the E6-AP (UBE3A) carboxyl terminus) d | 0,00610448 | -1,2502  |
| Trem2    | NM_031254 // Trem2 // triggering receptor expressed on myeloid cells 2 // 17 C / | 0,00611118 | -1,20736 |
| BC046404 | NM_198861 // BC046404 // cDNA sequence BC046404 // 11 B2 // 192976 // BC053455   | 0,00611612 | -1,28094 |
| Coro7    | NM_030205 // Coro7 // coronin 7 // 16 A1 16 2.2 cM // 78885 // ENSMUST000000385  | 0,00614532 | -1,2659  |
| Cdc42bbp | NM_183016 // Cdc42bbp // CDC42 binding protein kinase beta // 12 F1 // 217866 // | 0,00621435 | -1,22057 |
| Atf6b    | NM_017406 // Atf6b // activating transcription factor 6 beta // 17 B1 17 18.85 c | 0,00623952 | -1,25908 |
| Nacc2    | NM_001037098 // Nacc2 // nucleus accumbens associated 2, BEN and BTB (POZ) domai | 0,00623983 | -1,20035 |
| Cntfr    | NM_016673 // Cntfr // ciliary neurotrophic factor receptor // 4 A5 4 19.9 cM //  | 0,00624612 | -1,3833  |
| Plp2     | NM_019755 // Plp2 // proteolipid protein 2 // X A2-A3.1 X 1.6 cM // 18824 // EN  | 0,00625331 | -1,28638 |
| Zc3h7b   | NM_001081016 // Zc3h7b // zinc finger CCCH type containing 7B // 15 E1 // 20286  | 0,00629034 | -1,28911 |
| Dhx32    | NM_133941 // Dhx32 // DEAH (Asp-Glu-Ala-His) box polypeptide 32 // 7 F3 // 10143 | 0,00631781 | -1,2019  |
| Src      | NM_009271 // Src // Rous sarcoma oncogene // 2 H1 2 89.0 cM // 20779 // NM_0010  | 0,00632488 | -1,20802 |
| Gna13    | NM_010303 // Gna13 // guanine nucleotide binding protein, alpha 13 // 11 E1 11 6 | 0,00636515 | -1,26151 |
| Dullard  | NM_026017 // Dullard // Dullard homolog (Xenopus laevis) // 11 B4 // 67181 // E  | 0,00636883 | -1,27711 |
| Lrp6     | NM_008514 // Lrp6 // low density lipoprotein receptor-related protein 6 // 6 G1  | 0,00636983 | -1,25117 |
| Mpv17l2  | NM_183170 // Mpv17l2 // MPV17 mitochondrial membrane protein-like 2 // 8 B3.3 // | 0,00637597 | -1,22476 |
| Arhgef9  | NM_001033329 // Arhgef9 // CDC42 guanine nucleotide exchange factor (GEF) 9 // X | 0,00640474 | -1,20554 |

|               |                                                                                   |            |          |
|---------------|-----------------------------------------------------------------------------------|------------|----------|
| Plxnd1        | NM_026376 // Plxnd1 // plexin D1 // 6 E3 // 67784 /// ENSMUST00000015511 // Plxn  | 0,00640701 | -1,38447 |
| Fmo1          | NM_010231 // Fmo1 // flavin containing monooxygenase 1 // 1 H1 1 92.6 cM // 1426  | 0,00643412 | -1,25398 |
| Srprb         | NM_009275 // Srprb // signal recognition particle receptor, B subunit // 9 F1 //  | 0,00645174 | -1,23829 |
| Podxl         | NM_013723 // Podxl // podocalyxin-like // 6 A3.3 6 10.0 cM // 27205 /// ENSMUST0  | 0,00645358 | -1,25189 |
| Pttg1ip       | NM_145925 // Pttg1ip // pituitary tumor-transforming 1 interacting protein // 10  | 0,00647379 | -1,20863 |
| Gjb6          | NM_001010937 // Gjb6 // gap junction protein, beta 6 // 14 C3 14 22.5 cM // 1462  | 0,00648584 | -1,26067 |
| Cyp2j9        | NM_028979 // Cyp2j9 // cytochrome P450, family 2, subfamily j, polypeptide 9 //   | 0,00649299 | -1,27681 |
| Flt1          | NM_010228 // Flt1 // FMS-like tyrosine kinase 1 // 5 G 5 82.0 cM // 14254 /// EN  | 0,00650322 | -1,29463 |
| Slc25a38      | NM_144793 // Slc25a38 // solute carrier family 25, member 38 // 9 F4 // 208638 /  | 0,00651054 | -1,20663 |
| Zswim6        | NM_145456 // Zswim6 // zinc finger, SWIM domain containing 6 // 13 D2.1 // 67263  | 0,00651568 | -1,21818 |
| Zhx2          | NM_199449 // Zhx2 // zinc fingers and homeoboxes 2 // 15 D1 15 28.4 cM // 387609  | 0,00653219 | -1,23387 |
| Snrnp200      | NM_177214 // Snrnp200 // small nuclear ribonucleoprotein 200 (U5) // 2 F1 2 62.2  | 0,00653267 | -1,26045 |
| Rcor1         | NM_198023 // Rcor1 // REST corepressor 1 // 12 F1 12 57.0 cM // 217864 // BC042   | 0,00653981 | -1,22139 |
| Lrrfp2        | NM_001164838 // Lrrfp2 // leucine rich repeat (in FLII) interacting protein 2 /   | 0,00654242 | -1,21452 |
| Suox          | NM_173733 // Suox // sulfite oxidase // 10 D3 // 211389 /// ENSMUST00000054764 // | 0,00660751 | -1,30294 |
| Rnf123        | NM_032543 // Rnf123 // ring finger protein 123 // 9 F2 // 84585 // BC057082 //    | 0,00664612 | -1,31889 |
| Pcyt1a        | NM_009981 // Pcyt1a // phosphate cytidylyltransferase 1, choline, alpha isoform   | 0,0066498  | -1,22606 |
| Senp1         | NM_144851 // Senp1 // SUMO1/sentrin specific peptidase 1 // 15 F1 15 55.8 cM //   | 0,00671228 | -1,21855 |
| Fstl4         | NM_177059 // Fstl4 // follistatin-like 4 // 11 B1.3 // 320027 /// ENSMUST0000003  | 0,00673237 | -1,28979 |
| Itpkb         | NM_001081175 // Itpkb // inositol 1,4,5-trisphosphate 3-kinase B // 1 H5 1 100.0  | 0,00676785 | -1,48608 |
| Stk16         | NM_011494 // Stk16 // serine/threonine kinase 16 // 1 C3 // 20872 /// NM_009447   | 0,00677141 | -1,23613 |
| Gpsm1         | NM_153410 // Gpsm1 // G-protein signalling modulator 1 (AGS3-like, C. elegans) /  | 0,00682039 | -1,20924 |
| Taf1d         | BC058964 // Taf1d // TATA box binding protein (Tbp)-associated factor, RNA polym  | 0,00688506 | -1,28182 |
| Dyrk1a        | NM_007890 // Dyrk1a // dual-specificity tyrosine-(Y)-phosphorylation regulated k  | 0,00691664 | -1,24044 |
| Ppp1r12b      | NM_001081307 // Ppp1r12b // protein phosphatase 1, regulatory (inhibitor) subuni  | 0,00702647 | -1,42491 |
| Dpy19l3       | NM_178704 // Dpy19l3 // dpy-19-like 3 (C. elegans) // 7 B2 // 233115 /// ENSMUST  | 0,00703183 | -1,3378  |
| 2410089E03Rik | NM_001162906 // 2410089E03Rik // RIKEN cDNA 2410089E03 gene // 15 A1 // 73692 //  | 0,00703357 | -1,22889 |
| Med25         | NM_029365 // Med25 // mediator of RNA polymerase II transcription, subunit 25 ho  | 0,00703781 | -1,32353 |
| Clmn          | NM_053155 // Clmn // calmin // 12 F1 // 94040 /// NM_001040682 // Clmn // calmin  | 0,00714396 | -1,26791 |
| Egfr          | NM_207655 // Egfr // epidermal growth factor receptor // 11 A1-A4 11 9.0 cM // 1  | 0,00715107 | -1,23628 |
| Cntnap5c      | NM_001081653 // Cntnap5c // contactin associated protein-like 5C // 17 D // 6202  | 0,00719261 | -1,21391 |
| Slc2a13       | NM_001033633 // Slc2a13 // solute carrier family 2 (facilitated glucose transpor  | 0,00721488 | -1,2473  |
| C2cd2l        | NM_027909 // C2cd2l // C2 calcium-dependent domain containing 2-like // 9 B // 7  | 0,00725287 | -1,29514 |
| Sid2          | NM_172257 // Sid2 // SID1 transmembrane family, member 2 // 9 A5.2 // 214597 //   | 0,00725711 | -1,27481 |
| Fndc5         | NM_027402 // Fndc5 // fibronectin type III domain containing 5 // 4 D2.2 // 3840  | 0,00727209 | -1,2527  |
| Epas1         | NM_010137 // Epas1 // endothelial PAS domain protein 1 // 17 E4 // 13819 /// ENS  | 0,00732147 | -1,36759 |
| Kcnn3         | NM_080466 // Kcnn3 // potassium intermediate/small conductance calcium-activated  | 0,00733476 | -1,30124 |
| Gpc5          | NM_175500 // Gpc5 // glypican 5 // --- // 103978 /// ENSMUST00000022707 // Gpc5   | 0,00734229 | -1,21446 |
| Tm9sf4        | NM_133847 // Tm9sf4 // transmembrane 9 superfamily protein member 4 // 2 H1 // 9  | 0,00734358 | -1,24311 |
| Gpr116        | NM_001081178 // Gpr116 // G protein-coupled receptor 116 // 17 B3 // 224792 ///   | 0,00740706 | -1,29125 |
| 9430021M05Rik | NR_033569 // 9430021M05Rik // RIKEN cDNA 9430021M05 gene // --- // 77288 /// ENS  | 0,00746507 | -1,34151 |
| Zfp58         | NM_001007575 // Zfp58 // zinc finger protein 58 // 13 B3 // 238693 /// ENSMUST00  | 0,00747075 | -1,27754 |
| Pacs2         | NM_001081170 // Pacs2 // phosphofurin acidic cluster sorting protein 2 // 12 F1   | 0,00749034 | -1,27316 |
| Lrrc4b        | NM_198250 // Lrrc4b // leucine rich repeat containing 4B // 7 B4 // 272381 /// E  | 0,00753625 | -1,20963 |
| Plcd4         | NM_001081456 // Plcd4 // phospholipase C, delta 4 // 1 C3 1 39.2 cM // 18802 ///  | 0,00753914 | -1,28384 |

|               |                                                                                  |            |          |
|---------------|----------------------------------------------------------------------------------|------------|----------|
| Slc23a2       | NM_018824 // Slc23a2 // solute carrier family 23 (nucleobase transporters), memb | 0,00754739 | -1,24052 |
| Arhgef12      | NM_027144 // Arhgef12 // Rho guanine nucleotide exchange factor (GEF) 12 // 9 B  | 0,00756491 | -1,21895 |
| Slc16a2       | NM_009197 // Slc16a2 // solute carrier family 16 (monocarboxylic acid transporte | 0,00760598 | -1,30641 |
| Notch1        | NM_008714 // Notch1 // Notch gene homolog 1 (Drosophila) // 2 A3 2 15.0 cM // 18 | 0,00761254 | -1,34054 |
| Patz1         | NM_019574 // Patz1 // POZ (BTB) and AT hook containing zinc finger 1 // 11 A1 // | 0,00762242 | -1,29814 |
| Abcb1a        | NM_011076 // Abcb1a // ATP-binding cassette, sub-family B (MDR/TAP), member 1A / | 0,00763263 | -1,22467 |
| Mapk4         | NM_172632 // Mapk4 // mitogen-activated protein kinase 4 // 18 E2 // 225724 //   | 0,00766081 | -1,25725 |
| Klf13         | NM_021366 // Klf13 // Kruppel-like factor 13 // 7 C // 50794 // ENSMUST00000063  | 0,00767841 | -1,21214 |
| Oplah         | NM_153122 // Oplah // 5-oxoprolinase (ATP-hydrolysing) // 15 D3 // 75475 // ENS  | 0,00769063 | -1,26311 |
| Pnmal2        | NM_001099636 // Pnmal2 // PNMA-like 2 // 7 A2 // 434128 // ENSMUST00000094807 /  | 0,00770792 | -1,20986 |
| Zbtb20        | ENSMUST00000033479 // Zbtb20 // zinc finger and BTB domain containing 20 // 16 B | 0,00772592 | -1,39167 |
| Siglech       | NM_178706 // Siglech // sialic acid binding Ig-like lectin H // 7 B5 // 233274 / | 0,00775453 | -1,26054 |
| Foxo3         | ENSMUST00000105502 // Foxo3 // forkhead box O3 // 10 B2 10 30.0 cM // 56484 //   | 0,00775884 | -1,27111 |
| Jak2          | NM_008413 // Jak2 // Janus kinase 2 // 19 C1 19 24.0 cM // 16452 // NM_00104817  | 0,00776123 | -1,20842 |
| Mtap4         | NM_008633 // Mtap4 // microtubule-associated protein 4 // 9 F2 9 58.0 cM // 1775 | 0,00776381 | -1,22606 |
| Pan2          | NM_133992 // Pan2 // PAN2 polyA specific ribonuclease subunit homolog (S. cerevi | 0,00781747 | -1,20487 |
| Bud13         | NM_146000 // Bud13 // BUD13 homolog (yeast) // 9 A5.2 // 215051 // ENSMUST00000  | 0,00783126 | -1,21866 |
| C2cd3         | NM_001017985 // C2cd3 // C2 calcium-dependent domain containing 3 // 7 E3 // 277 | 0,00784003 | -1,26668 |
| Fam198b       | NM_133187 // Fam198b // family with sequence similarity 198, member B // 3 E3 // | 0,0078412  | -1,20067 |
| Gpr155        | NM_001080707 // Gpr155 // G protein-coupled receptor 155 // 2 C3 // 68526 // EN  | 0,00785382 | -1,24553 |
| Nr3c2         | NM_001083906 // Nr3c2 // nuclear receptor subfamily 3, group C, member 2 // 8 C1 | 0,00786453 | -1,31084 |
| Nacc1         | NM_025788 // Nacc1 // nucleus accumbens associated 1, BEN and BTB (POZ) domain c | 0,00786879 | -1,29369 |
| Rnf44         | NR_027395 // Rnf44 // ring finger protein 44 // 13 B1 // 105239 // NR_027396 //  | 0,00787358 | -1,32358 |
| Igfbp5        | NM_010518 // Igfbp5 // insulin-like growth factor binding protein 5 // 1 C3 1 36 | 0,00789301 | -1,25946 |
| Gpr124        | NM_054044 // Gpr124 // G protein-coupled receptor 124 // 8 A3 // 78560 // ENSMU  | 0,00789714 | -1,28669 |
| Lpp           | NM_178665 // Lpp // LIM domain containing preferred translocation partner in lip | 0,00790122 | -1,30825 |
| Chd7          | NM_001081417 // Chd7 // chromodomain helicase DNA binding protein 7 // 4 A1 4 1. | 0,00791529 | -1,32431 |
| 4632419I22Rik | BC067002 // 4632419I22Rik // RIKEN cDNA 4632419I22 gene // 11 C // 74038 // BC0  | 0,00792762 | -1,24436 |
| Pdgfrb        | NM_001146268 // Pdgfrb // platelet derived growth factor receptor, beta polypept | 0,00794876 | -1,28272 |
| Ndrp1         | NM_008681 // Ndrp1 // N-myc downstream regulated gene 1 // 15 D2 // 17988 // EN  | 0,00801641 | -1,27888 |
| Morn4         | NM_198108 // Morn4 // MORN repeat containing 4 // 19 C3 // 226123 // ENSMUST000  | 0,00805921 | -1,20724 |
| Ttc4          | NM_028209 // Ttc4 // tetratricopeptide repeat domain 4 // 4 C7 // 72354 // NM_0  | 0,00816145 | -1,2018  |
| Csmd3         | NM_001081391 // Csmd3 // CUB and Sushi multiple domains 3 // 15 D1 // 239420 //  | 0,00816457 | -1,26498 |
| Kcnh3         | NM_010601 // Kcnh3 // potassium voltage-gated channel, subfamily H (eag-related) | 0,00824307 | -1,37271 |
| Eif3f         | NM_025344 // Eif3f // eukaryotic translation initiation factor 3, subunit F // 7 | 0,00824684 | -1,23973 |
| Rapgef1       | NM_001039087 // Rapgef1 // Rap guanine nucleotide exchange factor (GEF) 1 // 2 B | 0,00825838 | -1,24245 |
| Msi2          | NM_054043 // Msi2 // Musashi homolog 2 (Drosophila) // 11 C // 76626 // ENSMUST  | 0,00826616 | -1,26431 |
| Taok2         | NM_001163774 // Taok2 // TAO kinase 2 // 7 F3 // 381921 // NM_001163775 // Taok  | 0,00827104 | -1,25737 |
| Kank3         | NM_030697 // Kank3 // KN motif and ankyrin repeat domains 3 // 17 B1 // 80880 // | 0,00827962 | -1,27823 |
| Brsk1         | NM_001003920 // Brsk1 // BR serine/threonine kinase 1 // 7 A1 // 381979 // NM_0  | 0,00829488 | -1,22298 |
| Ano6          | NM_175344 // Ano6 // anoctamin 6 // 15 F1 // 105722 // ENSMUST00000071874 // An  | 0,00829776 | -1,30857 |
| Lpar4         | NM_175271 // Lpar4 // lysophosphatidic acid receptor 4 // X D // 78134 // ENSMU  | 0,00833989 | -1,22042 |
| Kalrn         | NM_177357 // Kalrn // kalirin, RhoGEF kinase // 16 B3 // 545156 // NM_001164268  | 0,00834259 | -1,25979 |
| Chd4          | NM_145979 // Chd4 // chromodomain helicase DNA binding protein 4 // 6 F3 6 58.4  | 0,00841438 | -1,22581 |
| Cpeb4         | NM_026252 // Cpeb4 // cytoplasmic polyadenylation element binding protein 4 // 1 | 0,00842209 | -1,27045 |



|               |                                                                                  |            |          |
|---------------|----------------------------------------------------------------------------------|------------|----------|
| Pltp          | NM_011125 // Pltp // phospholipid transfer protein // 2 H3 2 93.0 cM // 18830 // | 0,00843383 | -1,28807 |
| Kcnip4        | NM_030265 // Kcnip4 // Kv channel interacting protein 4 // 5 B3 // 80334 // ENS  | 0,00844016 | -1,23715 |
| Gne           | NM_015828 // Gne // glucosamine // 4 B1 // 50798 // ENSMUST0000030201 // Gne /   | 0,00846753 | -1,21643 |
| Plxna3        | NM_008883 // Plxna3 // plexin A3 // X B-C1 X 29.86 cM // 18846 // ENSMUST000000  | 0,00850076 | -1,32048 |
| Pkmyt1        | NM_023058 // Pkmyt1 // protein kinase, membrane associated tyrosine/threonine 1  | 0,00852193 | -1,21372 |
| Tns3          | NM_001083587 // Tns3 // tensin 3 // 11 A1 // 319939 // ENSMUST0000020695 // Tn   | 0,00853183 | -1,2326  |
| Man2b2        | NM_008550 // Man2b2 // mannosidase 2, alpha B2 // 5 B2 // 17160 // ENSMUST00000  | 0,0085377  | -1,22839 |
| Itgb8         | NM_177290 // Itgb8 // integrin beta 8 // 12 F2 // 320910 // ENSMUST0000026360    | 0,00857069 | -1,2743  |
| Nipbl         | NM_201232 // Nipbl // Nipped-B homolog (Drosophila) // 15 A2 // 71175 // NM_027  | 0,00862177 | -1,20549 |
| Snx18         | NM_130796 // Snx18 // sorting nexin 18 // 13 D2.2 // 170625 // ENSMUST000001092  | 0,00864949 | -1,24082 |
| Fam163a       | NM_177838 // Fam163a // family with sequence similarity 163, member A // 1 G3 // | 0,00871561 | -1,36956 |
| Pla2g5        | NM_001122954 // Pla2g5 // phospholipase A2, group V // 4 D3 4 68.0 cM // 18784 / | 0,00876406 | -1,27575 |
| Phactr3       | NM_028806 // Phactr3 // phosphatase and actin regulator 3 // 2 H4 // 74189 // N  | 0,00878915 | -1,21866 |
| Fgd1          | NM_008001 // Fgd1 // FYVE, RhoGEF and PH domain containing 1 // X F3 X 64.0 cM / | 0,00880769 | -1,24974 |
| Zc3hav1       | NM_172467 // Zc3hav1 // zinc finger CCCH-type, antiviral 1-like // 6 B1 // 2090  | 0,00882858 | -1,21216 |
| Mtss1         | NM_198625 // Mtss1 // metastasis suppressor 1-like // 8 E1 // 244654 // ENSMUS   | 0,00886847 | -1,35147 |
| Syne2         | NM_001005510 // Syne2 // synaptic nuclear envelope 2 // 12 C3 // 319565 // BC08  | 0,00886999 | -1,20538 |
| Nup62         | NM_053074 // Nup62 // nucleoporin 62 // 7 B4 7 23.1 cM // 18226 // ENSMUST00000  | 0,00887023 | -1,23256 |
| Chd7          | NM_001081417 // Chd7 // chromodomain helicase DNA binding protein 7 // 4 A1 4 1. | 0,0088823  | -1,37116 |
| Celf1         | NM_017368 // Celf1 // CUGBP, Elav-like family member 1 // 2 E1 2 47.5 cM // 1304 | 0,00888363 | -1,20705 |
| C130039O16Rik | NM_001163502 // C130039O16Rik // RIKEN cDNA C130039O16 gene // 12 D1 // 238317 / | 0,00888399 | -1,27503 |
| Tpp1          | NM_009906 // Tpp1 // tripeptidyl peptidase 1 // 7 E3 7 50.0 cM // 12751 // ENSM  | 0,00888469 | -1,30809 |
| Xpo4          | NM_020506 // Xpo4 // exportin 4 // 14 C3 // 57258 // ENSMUST00000089482 // Xpo4  | 0,00896783 | -1,24157 |
| Slc1a5        | NM_009201 // Slc1a5 // solute carrier family 1 (neutral amino acid transporter), | 0,0089777  | -1,26528 |
| D10Bwg1379e   | NM_001033258 // D10Bwg1379e // DNA segment, Chr 10, Brigham & Women's Genetics 1 | 0,00899726 | -1,28471 |
| Axl           | NM_009465 // Axl // AXL receptor tyrosine kinase // 7 A3-B1 7 6.0 cM // 26362 // | 0,00901071 | -1,33908 |
| Rad54l2       | NM_030730 // Rad54l2 // RAD54 like 2 (S. cerevisiae) // --- // 81000 // ENSMUST  | 0,00902016 | -1,28433 |
| Gpr12         | NM_001010941 // Gpr12 // G-protein coupled receptor 12 // 5 G3 // 14738 // NM_0  | 0,00902619 | -1,22046 |
| Dpf1          | NM_013874 // Dpf1 // D4, zinc and double PHD fingers family 1 // 7 B1 // 29861 / | 0,00904505 | -1,29262 |
| Slc27a1       | NM_011977 // Slc27a1 // solute carrier family 27 (fatty acid transporter), membe | 0,00907744 | -1,31278 |
| Smox          | NM_001177833 // Smox // spermine oxidase // 2 F1 // 228608 // NM_145533 // Smox  | 0,00908172 | -1,24026 |
| Htt           | NM_010414 // Htt // huntingtin // 5 B2 5 20.0 cM // 15194 // ENSMUST00000080036  | 0,00909822 | -1,24986 |
| Ctdsp2        | NM_001113470 // Ctdsp2 // CTD (carboxy-terminal domain, RNA polymerase II, polyp | 0,00917138 | -1,25437 |
| Lama2         | NM_008481 // Lama2 // laminin, alpha 2 // 10 A4-B1 10 20.0 cM // 16773 // ENSMU  | 0,00918019 | -1,22294 |
| Gm9776        | ENSMUST00000059598 // Gm9776 // predicted gene 9776 // 13 D1 13 // 328309        | 0,00918913 | -1,20969 |
| Tle3          | NM_001083927 // Tle3 // transducin-like enhancer of split 3, homolog of Drosophi | 0,00920133 | -1,32437 |
| Nr2e1         | NM_152229 // Nr2e1 // nuclear receptor subfamily 2, group E, member 1 // 10 B2 1 | 0,00920852 | -1,24171 |
| Twf1          | NM_008971 // Twf1 // twinfilin, actin-binding protein, homolog 1 (Drosophila) // | 0,009226   | -1,22257 |
| Zfp462        | NM_172867 // Zfp462 // zinc finger protein 462 // 4 B3 // 242466 // ENSMUST00000 | 0,00923247 | -1,3353  |
| Tbc1d9        | NM_001111304 // Tbc1d9 // TBC1 domain family, member 9 // 8 C3 // 71310 // NM_0  | 0,00925122 | -1,25789 |
| 8430419L09Rik | NM_028982 // 8430419L09Rik // RIKEN cDNA 8430419L09 gene // 6 G1 // 74525 // EN  | 0,00928407 | -1,21745 |
| Tanc2         | NM_181071 // Tanc2 // tetratricopeptide repeat, ankyrin repeat and coiled-coil c | 0,00928672 | -1,30648 |
| Giyd2         | NR_033446 // Giyd2 // GIY-YIG domain containing 2 // 7 F3 // 75764 // NM_029420  | 0,00930975 | -1,25369 |
| Tmem170b      | NM_001163572 // Tmem170b // transmembrane protein 170B // 13 A4 // 621976        | 0,00933926 | -1,20613 |
| Cln6          | NM_001033175 // Cln6 // ceroid-lipofuscinosis, neuronal 6 // 9 B // 76524 // EN  | 0,00934719 | -1,2305  |

|               |                                                                                  |            |          |
|---------------|----------------------------------------------------------------------------------|------------|----------|
| Mtor          | NM_020009 // Mtor // mechanistic target of rapamycin (serine/threonine kinase) / | 0,0093637  | -1,27862 |
| Ash1l         | NM_138679 // Ash1l // ash1 (absent, small, or homeotic)-like (Drosophila) // 3 F | 0,0093743  | -1,23139 |
| 4933407C03Rik | NM_001163262 // 4933407C03Rik // RIKEN cDNA 4933407C03 gene // 8 E1 // 74440 /// | 0,00937901 | -1,2559  |
| Apln          | NM_013912 // Apln // apelin // X A3.2 // 30878 /// ENSMUST00000039026 // Apln // | 0,00937946 | -1,31279 |
| Mapkbp1       | NM_011941 // Mapkbp1 // mitogen-activated protein kinase binding protein 1 // 2  | 0,00944529 | -1,29625 |
| Car4          | NM_007607 // Car4 // carbonic anhydrase 4 // 11 C // 12351 /// ENSMUST0000010319 | 0,00946151 | -1,20842 |
| Adamts3       | NM_177872 // Adamts3 // a disintegrin-like and metallopeptidase (reprolysin type | 0,00946306 | -1,20696 |
| Ubash3b       | NM_176860 // Ubash3b // ubiquitin associated and SH3 domain containing, B // 9 A | 0,009478   | -1,25519 |
| Apc2          | NM_011789 // Apc2 // adenomatosis polyposis coli 2 // 10 B5-C2 // 23805 /// ENSM | 0,00947974 | -1,26482 |
| Slc39a13      | NM_026721 // Slc39a13 // solute carrier family 39 (metal ion transporter), membe | 0,00948193 | -1,27628 |
| Wasf2         | NM_153423 // Wasf2 // WAS protein family, member 2 // 4 D2.3 // 242687 /// ENSMU | 0,00951097 | -1,27552 |
| Kcnc2         | NM_001025581 // Kcnc2 // potassium voltage gated channel, Shaw-related subfamily | 0,00951571 | -1,20729 |
| Rnf125        | NM_026301 // Rnf125 // ring finger protein 125 // 18 A2 // 67664 /// ENSMUST0000 | 0,00953814 | -1,26053 |
| Ptprg         | NM_008981 // Ptprg // protein tyrosine phosphatase, receptor type, G // 14 A2 14 | 0,00959021 | -1,27434 |
| Rbms2         | NM_001039080 // Rbms2 // RNA binding motif, single stranded interacting protein  | 0,00959565 | -1,31823 |
| Wdr6          | NM_031392 // Wdr6 // WD repeat domain 6 // 9 F2 // 83669 /// ENSMUST0000068700   | 0,00961845 | -1,38015 |
| Tnrc18        | NM_001122730 // Tnrc18 // trinucleotide repeat containing 18 // 5 G2 // 231861 / | 0,00962918 | -1,27656 |
| Rgs5          | NM_009063 // Rgs5 // regulator of G-protein signaling 5 // 1 H2 1 86.5 cM // 197 | 0,00965362 | -1,20171 |
| Fam65b        | NM_029679 // Fam65b // family with sequence similarity 65, member B // 13 A3.2 / | 0,0096686  | -1,20493 |
| Zfp407        | NM_001033341 // Zfp407 // zinc finger protein 407 // 18 E4 // 240476 /// ENSMUST | 0,0096768  | -1,20662 |
| Sez6l         | NM_019982 // Sez6l // seizure related 6 homolog like // 5 F // 56747 /// ENSMUST | 0,00971213 | -1,24493 |
| C230055K05Rik | NM_001039231 // C230055K05Rik // RIKEN cDNA C230055K05 gene // 5 E5 // 626391 // | 0,00972526 | -1,21064 |
| Ildr2         | NM_001164528 // Ildr2 // immunoglobulin-like domain containing receptor 2 // 1 H | 0,00974931 | -1,40526 |
| Fads1         | NM_146094 // Fads1 // fatty acid desaturase 1 // 19 A // 76267 /// ENSMUST000000 | 0,00975257 | -1,21492 |
| Ilkap         | NM_023343 // Ilkap // integrin-linked kinase-associated serine/threonine phospho | 0,00976373 | -1,21855 |
| Fn1           | NM_010233 // Fn1 // fibronectin 1 // 1 C1-C5 1 36.1 cM // 14268 /// ENSMUST00000 | 0,00977977 | -1,27541 |
| Zfp827        | NM_178267 // Zfp827 // zinc finger protein 827 // 8 C1-C2 // 622675 /// ENSMUST0 | 0,00978417 | -1,2972  |
| Itsn1         | NM_010587 // Itsn1 // intersectin 1 (SH3 domain protein 1A) // 16 C3.3-C4 // 164 | 0,00978889 | -1,2637  |
| Bbs1          | NM_001033128 // Bbs1 // Bardet-Biedl syndrome 1 (human) // 19 A // 52028 /// ENS | 0,00979933 | -1,24913 |
| Ranbp17       | NM_023146 // Ranbp17 // RAN binding protein 17 // --- // 66011 /// ENSMUST000001 | 0,00980859 | -1,2062  |
| Megf10        | NM_001001979 // Megf10 // multiple EGF-like-domains 10 // 18 D3 // 70417 /// ENS | 0,00984076 | -1,28064 |
| Macf1         | NM_009600 // Macf1 // microtubule-actin crosslinking factor 1 // 4 D2.2 4 57.4 c | 0,00984646 | -1,27458 |
| Mbtps1        | NM_019709 // Mbtps1 // membrane-bound transcription factor peptidase, site 1 //  | 0,00986879 | -1,20858 |
| Nbas          | NM_027706 // Nbas // neuroblastoma amplified sequence // 12 A3 // 71169 /// BC05 | 0,00987507 | -1,22944 |
| Drp2          | NM_010078 // Drp2 // dystrophin related protein 2 // X E3 // 13497 /// ENSMUST00 | 0,00991186 | -1,28739 |
| Phf2          | NM_011078 // Phf2 // PHD finger protein 2 // 13 A3-A4 13 10.0 cM // 18676 /// EN | 0,00992616 | -1,36716 |
| Dennd2a       | NM_172477 // Dennd2a // DENN/MADD domain containing 2A // 6 B1 // 209773 /// ENS | 0,00992813 | -1,23546 |
| Ppapdc1a      | NM_001080963 // Ppapdc1a // phosphatidic acid phosphatase type 2 domain containi | 0,00994723 | -1,31334 |
| Cacng7        | NM_133189 // Cacng7 // calcium channel, voltage-dependent, gamma subunit 7 // 7  | 0,00995788 | -1,34233 |
| Itpr2         | NM_019923 // Itpr2 // inositol 1,4,5-triphosphate receptor 2 // 6 G3 6 73.0 cM / | 0,00997905 | -1,23922 |
| 1700021K19Rik | BC060601 // 1700021K19Rik // RIKEN cDNA 1700021K19 gene // 16 B3 // 224118 /// B | 0,0100295  | -1,21539 |
| Ralgs1        | NM_175211 // Ralgs1 // Ral GEF with PH domain and SH3 binding motif 1 // 2 B //  | 0,0100303  | -1,23758 |
| Cttnbp2       | NM_080285 // Cttnbp2 // cortactin binding protein 2 // 6 A2 // 30785 /// ENSMUST | 0,0100624  | -1,28291 |
| Rab5b         | NM_177411 // Rab5b // RAB5B, member RAS oncogene family // 10 D3 // 19344 /// EN | 0,0100677  | -1,2107  |
| Chd3          | NM_146019 // Chd3 // chromodomain helicase DNA binding protein 3 // 11 B3 // 216 | 0,0101157  | -1,25544 |

|               |                                                                                   |           |          |
|---------------|-----------------------------------------------------------------------------------|-----------|----------|
| Chi311        | NM_007695 // Chi311 // chitinase 3-like 1 // 1 E4 1 72.3 cM // 12654 /// ENSMUST  | 0,0101349 | -1,26933 |
| Zfp236        | NM_177832 // Zfp236 // zinc finger protein 236 // 18 E3 18 57.0 cM // 329002 ///  | 0,0101527 | -1,29255 |
| Aup1          | NM_007517 // Aup1 // ancient ubiquitous protein 1 // 6 C3 6 34.77 cM // 11993 /// | 0,0101877 | -1,21389 |
| Ddah1         | NM_026993 // Ddah1 // dimethylarginine dimethylaminohydrolase 1 // 3 H3 // 69219  | 0,0102053 | -1,26123 |
| Sdhc          | NM_025321 // Sdhc // succinate dehydrogenase complex, subunit C, integral membra  | 0,0102332 | -1,27342 |
| Unc80         | NM_175510 // Unc80 // unc-80 homolog (C. elegans) // 1 C3 // 329178 /// ENSMUSTO  | 0,0102437 | -1,30234 |
| Mtap1s        | NM_173013 // Mtap1s // microtubule-associated protein 1S // 8 B3.3 // 270058 ///  | 0,0102642 | -1,24977 |
| Tmem38a       | NM_144534 // Tmem38a // transmembrane protein 38A // 8 B3.3 // 74166 /// NM_1769  | 0,0102838 | -1,42274 |
| Med13l        | NM_172424 // Med13l // mediator complex subunit 13-like // 5 F // 76199 /// ENSM  | 0,010294  | -1,33436 |
| Gpatch1       | NM_026181 // Gpatch1 // G patch domain containing 1 // 7 B1 // 67471 /// ENSMUST  | 0,0103071 | -1,23549 |
| Ddr1          | NM_007584 // Ddr1 // discoidin domain receptor family, member 1 // 17 C 17 21.5   | 0,0103153 | -1,28303 |
| 2610507B11Rik | NM_001002004 // 2610507B11Rik // RIKEN cDNA 2610507B11 gene // 11 B5 11 44.93 cM  | 0,0103345 | -1,22232 |
| Stk11         | NM_011492 // Stk11 // serine/threonine kinase 11 // 10 C1 // 20869 /// ENSMUST00  | 0,0103367 | -1,21645 |
| Zfp652        | NM_201609 // Zfp652 // zinc finger protein 652 // 11 D // 268469 /// ENSMUST0000  | 0,0103622 | -1,24801 |
| Tie1          | NM_011587 // Tie1 // tyrosine kinase with immunoglobulin-like and EGF-like domai  | 0,0103635 | -1,25852 |
| Ncor2         | NM_011424 // Ncor2 // nuclear receptor co-repressor 2 // --- // 20602 /// ENSMUS  | 0,0103934 | -1,29218 |
| Ap3d1         | NM_007460 // Ap3d1 // adaptor-related protein complex 3, delta 1 subunit // 10 C  | 0,0104072 | -1,22106 |
| BC052040      | NM_001145898 // BC052040 // cDNA sequence BC052040 // 2 E4 // 399568 /// NM_2072  | 0,0104198 | -1,248   |
| Pitpnm2       | NM_011256 // Pitpnm2 // phosphatidylinositol transfer protein, membrane-associat  | 0,0104317 | -1,31835 |
| Nt5dc2        | NM_027289 // Nt5dc2 // 5'-nucleotidase domain containing 2 // 14 B // 70021 ///   | 0,0104495 | -1,33012 |
| Bnip3         | NM_009760 // Bnip3 // BCL2/adenovirus E1B interacting protein 3 // 7 F5 // 12176  | 0,0105156 | -1,22984 |
| Kcnk9         | NM_001033876 // Kcnk9 // potassium channel, subfamily K, member 9 // 15 D3 // 22  | 0,010516  | -1,35954 |
| Sesn2         | NM_144907 // Sesn2 // sestrin 2 // 4 D2.3 // 230784 /// ENSMUST00000030724 // Se  | 0,0105231 | -1,29021 |
| Zfp618        | NM_028326 // Zfp618 // zinc fingerprotein 618 // 4 B3 // 72701 /// ENSMUST0000000 | 0,0105902 | -1,24836 |
| Slc9a5        | NM_001081332 // Slc9a5 // solute carrier family 9 (sodium/hydrogen exchanger), m  | 0,0106199 | -1,22267 |
| Stx17         | NM_026343 // Stx17 // syntaxin 17 // 4 B1 // 67727 /// ENSMUST00000107720 // Stx  | 0,0106296 | -1,24299 |
| Btbd7         | NM_172806 // Btbd7 // BTB (POZ) domain containing 7 // 12 E // 238386 /// ENSMUS  | 0,0106353 | -1,29067 |
| Kcnc1         | NM_008421 // Kcnc1 // potassium voltage gated channel, Shaw-related subfamily, m  | 0,0106579 | -1,30173 |
| Ncoa1         | NM_010881 // Ncoa1 // nuclear receptor coactivator 1 // 12 A2-A3 // 17977 /// EN  | 0,0106969 | -1,2785  |
| Slc12a2       | NM_009194 // Slc12a2 // solute carrier family 12, member 2 // 18 D3 18 32.0 cM /  | 0,0107156 | -1,20665 |
| Jph1          | NM_020604 // Jph1 // junctophilin 1 // 1 A4 // 57339 /// ENSMUST00000038382 // J  | 0,0107233 | -1,2523  |
| Akap6         | NM_198111 // Akap6 // A kinase (PRKA) anchor protein 6 // 12 C1 // 238161 /// EN  | 0,0107296 | -1,22876 |
| Cdh5          | NM_009868 // Cdh5 // cadherin 5 // 8 D3 8 51.0 cM // 12562 /// ENSMUST0000003433  | 0,0107325 | -1,23506 |
| Ncan          | NM_007789 // Ncan // neurocan // 8 B3.3 8 33.5 cM // 13004 /// ENSMUST0000000241  | 0,0107396 | -1,354   |
| 2310021P13Rik | BC151046 // 2310021P13Rik // RIKEN cDNA 2310021P13 gene // 14 A3 // 268721 /// N  | 0,0107411 | -1,29534 |
| Adamts3       | NM_177872 // Adamts3 // a disintegrin-like and metallopeptidase (reprolysin type  | 0,0107511 | -1,22792 |
| Dio2          | NM_010050 // Dio2 // deiodinase, iodothyronine, type II // 12 D3 // 13371 /// EN  | 0,0107887 | -1,33622 |
| Lgr4          | NM_172671 // Lgr4 // leucine-rich repeat-containing G protein-coupled receptor 4  | 0,0107951 | -1,21586 |
| Eepd1         | NM_026189 // Eepd1 // endonuclease/exonuclease/phosphatase family domain contain  | 0,0108023 | -1,24612 |
| Chst1         | NM_023850 // Chst1 // carbohydrate (keratan sulfate Gal-6) sulfotransferase 1 //  | 0,0108045 | -1,21393 |
| Fbxl18        | NM_001033312 // Fbxl18 // F-box and leucine-rich repeat protein 18 // 5 G2 5 ///  | 0,0108332 | -1,29711 |
| Tex261        | NM_009357 // Tex261 // testis expressed gene 261 // 6 C3 6 35.15 cM // 21766 ///  | 0,0108397 | -1,28332 |
| Lrp10         | NM_022993 // Lrp10 // low-density lipoprotein receptor-related protein 10 // 14   | 0,0108528 | -1,26419 |
| Gli3          | NM_008130 // Gli3 // GLI-Kruppel family member GLI3 // 13 A2 13 14.0 cM // 14634  | 0,0108622 | -1,30692 |
| Bag3          | NM_013863 // Bag3 // BCL2-associated athanogene 3 // 7 F3 // 29810 /// ENSMUST00  | 0,0108669 | -1,23054 |

|               |                                                                                  |           |          |
|---------------|----------------------------------------------------------------------------------|-----------|----------|
| Vaultrc5      | NR_027885 // Vaultrc5 // vault RNA component 5 // --- // 378472                  | 0,0108913 | -1,3095  |
| Tbc1d1        | NM_019636 // Tbc1d1 // TBC1 domain family, member 1 // 5 C3.1 // 57915 // ENSMU  | 0,0108952 | -1,27705 |
| Ddr2          | NM_022563 // Ddr2 // discoidin domain receptor family, member 2 // 1 H1-H5 1 90. | 0,0109274 | -1,25849 |
| Aqr           | NM_009702 // Aqr // aquarius // 2 E5-F2 2 65.0 cM // 11834 // ENSMUST0000004316  | 0,0109353 | -1,219   |
| Cd93          | NM_010740 // Cd93 // CD93 antigen // 2 G3 2 84.0 cM // 17064 // ENSMUST000000099 | 0,0109529 | -1,26733 |
| Apbb2         | NM_009686 // Apbb2 // amyloid beta (A4) precursor protein-binding, family B, mem | 0,0109695 | -1,23935 |
| Vac14         | NM_146216 // Vac14 // Vac14 homolog (S. cerevisiae) // 8 E1 // 234729 // ENSMUS  | 0,010977  | -1,2571  |
| Setd1b        | ENSMUST00000100731 // Setd1b // SET domain containing 1B // 5 F // 208043        | 0,0109927 | -1,30245 |
| Sirt6         | NM_181586 // Sirt6 // sirtuin 6 (silent mating type information regulation 2, ho | 0,0109963 | -1,25533 |
| Slc13a4       | NM_172892 // Slc13a4 // solute carrier family 13 (sodium/sulfate symporters), me | 0,0110162 | -1,48279 |
| Gm3002        | NR_033388 // Gm3002 // alpha-takusan pseudogene // 14 A1 14 // 100040852 // NR_  | 0,0110335 | -1,20814 |
| Csrnp2        | NM_153407 // Csrnp2 // cysteine-serine-rich nuclear protein 2 // 15 F1 // 207785 | 0,0110362 | -1,24495 |
| Mmp15         | NM_008609 // Mmp15 // matrix metalloproteinase 15 // 8 D1 8 45.5 cM // 17388 //  | 0,0110382 | -1,23229 |
| Ppm1m         | NM_198931 // Ppm1m // protein phosphatase 1M // 9 F1 // 67905 // NM_026447 // P  | 0,0110589 | -1,21317 |
| Fbxl17        | NM_015794 // Fbxl17 // F-box and leucine-rich repeat protein 17 // 17 E1.2 // 50 | 0,0110703 | -1,22425 |
| Rab11b        | NM_008997 // Rab11b // RAB11B, member RAS oncogene family // 17 B1 17 18.3 cM // | 0,0111033 | -1,26963 |
| Rela          | NM_009045 // Rela // v-rel reticuloendotheliosis viral oncogene homolog A (avian | 0,0111111 | -1,23518 |
| Cdc34         | NM_177613 // Cdc34 // cell division cycle 34 homolog (S. cerevisiae) // 10 C1 10 | 0,0111272 | -1,24976 |
| Frm4a         | NM_172475 // Frm4a // FERM domain containing 4A // 2 A1 // 209630 // NM_001177   | 0,0111408 | -1,31059 |
| Eif2c2        | NM_153178 // Eif2c2 // eukaryotic translation initiation factor 2C, 2 // 15 D3 / | 0,0111481 | -1,24424 |
| R3hcc1        | NM_001146012 // R3hcc1 // R3H domain and coiled-coil containing 1 // 14 D2 14 32 | 0,0111588 | -1,22638 |
| Hsd17b11      | NM_053262 // Hsd17b11 // hydroxysteroid (17-beta) dehydrogenase 11 // 5 E4 // 11 | 0,0111659 | -1,28364 |
| Ywhaq         | NM_011739 // Ywhaq // tyrosine 3-monooxygenase/tryptophan 5-monooxygenase activa | 0,0111855 | -1,23321 |
| Pknox2        | NM_001029838 // Pknox2 // Pbx/knotted 1 homeobox 2 // 9 A4 // 208076 // NM_1489  | 0,0111923 | -1,29134 |
| Zfp361        | NM_007564 // Zfp361 // zinc finger protein 36, C3H type-like 1 // 12 C3 // 1219  | 0,0112059 | -1,45208 |
| Farp1         | NM_134082 // Farp1 // FERM, RhoGEF (Arhgef) and pleckstrin domain protein 1 (cho | 0,0112399 | -1,31555 |
| Znf512b       | NM_001164597 // Znf512b // zinc finger protein 512B // 2 H4 // 269401 // ENSMUS  | 0,0112524 | -1,22977 |
| Crebzf        | NM_145151 // Crebzf // CREB/ATF bZIP transcription factor // 7 E1 // 233490 //   | 0,0112562 | -1,22929 |
| Zfp687        | NM_030074 // Zfp687 // zinc finger protein 687 // 3 F2 // 78266 // ENSMUST00000  | 0,0112687 | -1,31564 |
| B4galt2       | NM_017377 // B4galt2 // UDP-Gal:betaGlcNAc beta 1,4- galactosyltransferase, poly | 0,0113326 | -1,27337 |
| Kifc2         | NM_010630 // Kifc2 // kinesin family member C2 // 15 D-E 15 43.4 cM // 16581 //  | 0,0113481 | -1,25317 |
| Syt7          | NM_173068 // Syt7 // synaptotagmin VII // 19 B // 54525 // NM_173067 // Syt7 //  | 0,0114087 | -1,28205 |
| Apc           | NM_007462 // Apc // adenomatosis polyposis coli // 18 B1 18 15.0 cM // 11789 //  | 0,0114228 | -1,26047 |
| Pfas          | NM_001159519 // Pfas // phosphoribosylformylglycinamide synthase (FGAR amidotr   | 0,0114234 | -1,21783 |
| Socs7         | NM_138657 // Socs7 // suppressor of cytokine signaling 7 // 11 D // 192157 // E  | 0,0114731 | -1,26278 |
| 2410002F23Rik | NM_025880 // 2410002F23Rik // RIKEN cDNA 2410002F23 gene // 7 B4 // 668661 // E  | 0,0114989 | -1,20451 |
| Parva         | NM_020606 // Parva // parvin, alpha // 7 F1 // 57342 // ENSMUST00000033030 // P  | 0,011555  | -1,26791 |
| Kirrel3       | NM_026324 // Kirrel3 // kin of IRRE like 3 (Drosophila) // 9 A4 // 67703 // ENS  | 0,0115679 | -1,30498 |
| Zfp248        | NM_028335 // Zfp248 // zinc finger protein 248 // 6 F1 // 72720 // ENSMUST00000  | 0,0116072 | -1,21624 |
| Sipa11        | NM_001167983 // Sip11 // signal-induced proliferation-associated 1 like 1 // 1   | 0,0116647 | -1,23928 |
| Gna12         | NM_010302 // Gna12 // guanine nucleotide binding protein, alpha 12 // 5 G2 5 82. | 0,0117557 | -1,32503 |
| Ankrd43       | NM_183173 // Ankrd43 // ankyrin repeat domain 43 // 11 B1.3 // 237761 // ENSMUS  | 0,0117756 | -1,25059 |
| Ncoa3         | NM_008679 // Ncoa3 // nuclear receptor coactivator 3 // 2 H2-H4 // 17979 // ENS  | 0,0117771 | -1,25754 |
| Ptplb         | NM_023587 // Ptplb // protein tyrosine phosphatase-like (proline instead of cata | 0,0118056 | -1,2778  |
| Tll1          | NM_178869 // Tll1 // tubulin tyrosine ligase-like 1 // 15 E1 // 319953 // ENSM   | 0,0118141 | -1,23001 |

|          |                                                                                   |           |          |
|----------|-----------------------------------------------------------------------------------|-----------|----------|
| Hipk2    | NM_010433 // Hipk2 // homeodomain interacting protein kinase 2 // 6 B // 15258 /  | 0,0118366 | -1,33711 |
| Ssh1     | NM_198109 // Ssh1 // slingshot homolog 1 (Drosophila) // 5 F // 231637 /// ENSMU  | 0,0118489 | -1,23383 |
| Lmf1     | NM_029624 // Lmf1 // lipase maturation factor 1 // 17 A3.3 // 76483 /// ENSMUST0  | 0,011856  | -1,34892 |
| Dnm2     | NM_001039520 // Dnm2 // dynamin 2 // 9 A3 9 7.0 cM // 13430 /// NM_010744 // Tme  | 0,0118735 | -1,20652 |
| Epb4.9   | NM_013514 // Epb4.9 // erythrocyte protein band 4.9 // 14 D2 14 38.0 cM // 13829  | 0,0118814 | -1,24645 |
| Helz     | NM_198298 // Helz // helicase with zinc finger domain // 11 E1 // 78455 /// ENSM  | 0,011886  | -1,30404 |
| Rnf10    | NM_016698 // Rnf10 // ring finger protein 10 // 5 F 5 62.0 cM // 50849 /// ENSMU  | 0,0118883 | -1,20294 |
| Ccm2     | NM_146014 // Ccm2 // cerebral cavernous malformation 2 homolog (human) // 11 A1   | 0,0119401 | -1,20111 |
| Ddx17    | NM_199080 // Ddx17 // DEAD (Asp-Glu-Ala-Asp) box polypeptide 17 // 15 E1 // 6704  | 0,0119705 | -1,21414 |
| Glg1     | NM_009149 // Glg1 // golgi apparatus protein 1 // 8 E1 8 53.5 cM // 20340 /// EN  | 0,0119844 | -1,21737 |
| Sik2     | NM_178710 // Sik2 // salt inducible kinase 2 // 9 A5.3 // 235344 /// NM_00103408  | 0,0119895 | -1,24595 |
| Unc13c   | NM_001081153 // Unc13c // unc-13 homolog C (C. elegans) // 9 D // 208898 /// ENS  | 0,0120027 | -1,2806  |
| Chchd5   | NM_025395 // Chchd5 // coiled-coil-helix-coiled-coil-helix domain containing 5 /  | 0,0121083 | -1,20908 |
| Prdm11   | NM_001177536 // Prdm11 // PR domain containing 11 // 2 E1 // 100042784 /// ENSMU  | 0,0121125 | -1,22377 |
| Heatr5b  | NM_001081179 // Heatr5b // HEAT repeat containing 5B // 17 E3 // 320473 /// ENSM  | 0,0121216 | -1,25205 |
| Arrb2    | NM_145429 // Arrb2 // arrestin, beta 2 // 11 B3 11 45.0 cM // 216869 /// ENSMUST  | 0,0121267 | -1,22159 |
| Cspg4    | NM_139001 // Cspg4 // chondroitin sulfate proteoglycan 4 // 9 B // 121021 /// EN  | 0,0121416 | -1,26561 |
| Dapk1    | NM_029653 // Dapk1 // death associated protein kinase 1 // 13 B2 13 40.0 cM // 6  | 0,0121467 | -1,24678 |
| Fam108a  | NM_145421 // Fam108a // family with sequence similarity 108, member A // 10 C1 1  | 0,0121545 | -1,21084 |
| Mgat5b   | NM_172948 // Mgat5b // mannoside acetylglucosaminyltransferase 5, isoenzyme B //  | 0,012155  | -1,2363  |
| Bmp6     | NM_007556 // Bmp6 // bone morphogenetic protein 6 // 13 A3.3 13 20.0 cM // 12161  | 0,0121695 | -1,40591 |
| Pkn1     | NM_177262 // Pkn1 // protein kinase N1 // 8 C2 // 320795 /// ENSMUST00000005616   | 0,0122057 | -1,25936 |
| Ank      | NM_020332 // Ank // progressive ankylosis // 15 B1 15 14.4 cM // 11732 /// ENSMU  | 0,0122549 | -1,21171 |
| Fam120c  | NM_198105 // Fam120c // family with sequence similarity 120, member C // X F2 //  | 0,0122634 | -1,29082 |
| Cdk16    | NM_011049 // Cdk16 // cyclin-dependent kinase 16 // X A1.3 X 5.7 cM // 18555 ///  | 0,012272  | -1,21876 |
| Nfia     | NM_010905 // Nfia // nuclear factor I/A // 4 C4-C6 4 45.8 cM // 18027 /// NM_001  | 0,0122746 | -1,29809 |
| 09-mars  | NM_001033262 // March9 // membrane-associated ring finger (C3HC4) 9 // 10 D3 //   | 0,0122808 | -1,25545 |
| Ppap2b   | NM_080555 // Ppap2b // phosphatidic acid phosphatase type 2B // 4 C6 4 52.7 cM /  | 0,0122976 | -1,28885 |
| Ldb1     | NM_010697 // Ldb1 // LIM domain binding 1 // 19 C3 19 46.0 cM // 16825 /// NM_00  | 0,0123006 | -1,21323 |
| Ppp1r12b | NM_001081307 // Ppp1r12b // protein phosphatase 1, regulatory (inhibitor) subuni  | 0,0123076 | -1,3337  |
| Sorbs1   | NM_178362 // Sorbs1 // sorbin and SH3 domain containing 1 // 19 C3 19 36.5 cM //  | 0,0123283 | -1,2946  |
| Tcf7l2   | NM_001142918 // Tcf7l2 // transcription factor 7-like 2, T-cell specific, HMG-bo  | 0,0123401 | -1,26046 |
| Stim1    | NM_009287 // Stim1 // stromal interaction molecule 1 // 7 E3 7 50.0 cM // 20866   | 0,0123595 | -1,22185 |
| Chrd1    | NM_001114385 // Chrd1 // chordin-like 1 // --- // 83453 /// NM_031258 // Chrd1    | 0,0123633 | -1,26065 |
| Gab1     | NM_021356 // Gab1 // growth factor receptor bound protein 2-associated protein 1  | 0,012377  | -1,24647 |
| Aph1a    | NM_146104 // Aph1a // anterior pharynx defective 1a homolog (C. elegans) // 3 F2  | 0,0123805 | -1,26559 |
| Celf5    | NM_176954 // Celf5 // CUGBP, Elav-like family member 5 // 10 C1 // 319586 /// EN  | 0,0123955 | -1,2483  |
| Dlg5     | NM_001163513 // Dlg5 // discs, large homolog 5 (Drosophila) // 14 A3 // 71228 //  | 0,0124218 | -1,3375  |
| Phc2     | NM_018774 // Phc2 // polyhomeotic-like 2 (Drosophila) // 4 D2.2 4 61.0 cM // 543  | 0,0124307 | -1,21556 |
| Ece1     | NM_199307 // Ece1 // endothelin converting enzyme 1 // 4 D3 // 230857 /// ENSMUS  | 0,0124337 | -1,20207 |
| Chd7     | NM_001081417 // Chd7 // chromodomain helicase DNA binding protein 7 // 4 A1 4 1.  | 0,0124346 | -1,23055 |
| Rreb1    | NR_033218 // Rreb1 // ras responsive element binding protein 1 // 13 A3.3 // 687  | 0,0124437 | -1,23462 |
| Mmp14    | NM_008608 // Mmp14 // matrix metalloproteinase 14 (membrane-inserted) // 14 C2 14 | 0,0124725 | -1,29207 |
| Ankrd13a | NM_026718 // Ankrd13a // ankyrin repeat domain 13a // 5 F // 68420 /// NR_027872  | 0,0124867 | -1,21499 |
| Syngap1  | XM_985548 // Syngap1 // synaptic Ras GTPase activating protein 1 homolog (rat) /  | 0,0124894 | -1,2425  |

|               |                                                                                  |           |          |
|---------------|----------------------------------------------------------------------------------|-----------|----------|
| Mtmr10        | NM_172742 // Mtmr10 // myotubularin related protein 10 // 7 C // 233315 /// ENSM | 0,0125278 | -1,22725 |
| Slc35e1       | NM_177766 // Slc35e1 // solute carrier family 35, member E1 // 8 B3.3 // 270066  | 0,0125925 | -1,22121 |
| Tpra1         | NM_011906 // Tpra1 // transmembrane protein, adipocyte associated 1 // 6 D2 //   | 0,01261   | -1,22953 |
| Slc44a2       | NM_152808 // Slc44a2 // solute carrier family 44, member 2 // 9 A3 // 68682 ///  | 0,0126488 | -1,20516 |
| Aqp4          | NM_009700 // Aqp4 // aquaporin 4 // 18 A1 18 6.0 cM // 11829 /// ENSMUST00000079 | 0,0126576 | -1,21    |
| Akt2          | NM_007434 // Akt2 // thymoma viral proto-oncogene 2 // 7 B1 7 6.5 cM // 11652 // | 0,0126608 | -1,24211 |
| Tcf4          | NM_013685 // Tcf4 // transcription factor 4 // --- // 21413 /// NM_001083967 //  | 0,0126892 | -1,23105 |
| Tmem127       | NM_175145 // Tmem127 // transmembrane protein 127 // 2 F1 2 62.4 cM // 69470 /// | 0,0127181 | -1,22713 |
| 3110082D06Rik | NM_028474 // 3110082D06Rik // RIKEN cDNA 3110082D06 gene // 17 B3 // 627626 ///  | 0,0127205 | -1,28879 |
| Abl1          | NM_001112703 // Abl1 // c-abl oncogene 1, receptor tyrosine kinase // 2 B 2 21.0 | 0,0127538 | -1,32623 |
| Map3k7        | NM_009316 // Map3k7 // mitogen-activated protein kinase kinase kinase 7 // 4 A5  | 0,012769  | -1,24701 |
| Dpagt1        | NM_007875 // Dpagt1 // dolichyl-phosphate (UDP-N-acetylglucosamine) acetylglucos | 0,0127801 | -1,20022 |
| Atp5g3        | NM_175015 // Atp5g3 // ATP synthase, H+ transporting, mitochondrial F0 complex,  | 0,0127959 | -1,21689 |
| Stk24         | NM_145465 // Stk24 // serine/threonine kinase 24 (STE20 homolog, yeast) // 14 E5 | 0,0127979 | -1,20744 |
| Gas2l1        | NM_030228 // Gas2l1 // growth arrest-specific 2 like 1 // 11 A1 // 78926 ///     | 0,0128055 | -1,2138  |
| Tpcn1         | NM_145853 // Tpcn1 // two pore channel 1 // 5 F // 252972 /// ENSMUST0000046426  | 0,0128332 | -1,30254 |
| Ligl1         | NM_008502 // Lig1 // lethal giant larvae homolog 1 (Drosophila) // 11 B2 11 34.  | 0,0128517 | -1,24797 |
| Scap          | NM_001001144 // Scap // SREBF chaperone // 9 F2 // 235623 /// NM_001103162 // Sc | 0,01288   | -1,27412 |
| Zfp704        | NM_133218 // Zfp704 // zinc finger protein 704 // 3 A1 // 170753 /// ENSMUST0000 | 0,0129012 | -1,21126 |
| Nck2          | NM_010879 // Nck2 // non-catalytic region of tyrosine kinase adaptor protein 2 / | 0,0129335 | -1,20938 |
| Ccnj          | NM_172839 // Ccnj // cyclin J // 19 C3 // 240665 /// ENSMUST00000025983 // Ccnj  | 0,012961  | -1,22661 |
| Ptdss2        | NM_013782 // Ptdss2 // phosphatidylserine synthase 2 // 7 F5 // 27388 /// ENSMUS | 0,0129622 | -1,23109 |
| Serinc5       | NM_172588 // Serinc5 // serine incorporator 5 // 13 C3 // 218442 /// ENSMUST0000 | 0,0129637 | -1,22288 |
| 5730469M10Rik | BC056635 // 5730469M10Rik // RIKEN cDNA 5730469M10 gene // 14 B // 70564 ///     | 0,0129687 | -1,23352 |
| Maz           | NM_010772 // Maz // MYC-associated zinc finger protein (purine-binding transcrip | 0,0129835 | -1,21888 |
| Bahcc1        | NM_198423 // Bahcc1 // BAH domain and coiled-coil containing 1 // 11 E2 // 26851 | 0,0130425 | -1,2757  |
| Sik3          | NM_027498 // Sik3 // SIK family kinase 3 // 9 A5.2 // 70661 /// ENSMUST000000786 | 0,0130711 | -1,28121 |
| Abhd2         | NM_018811 // Abhd2 // abhydrolase domain containing 2 // 7 D2 // 54608 /// ENSMU | 0,0130736 | -1,31536 |
| Maml3         | NM_001004176 // Maml3 // mastermind like 3 (Drosophila) // 3 C // 433586 /// ENS | 0,0130772 | -1,31509 |
| Dhdh          | NM_027903 // Dhdh // dihydrodiol dehydrogenase (dimeric) // 7 B2 // 71755 /// EN | 0,0130852 | -1,29085 |
| Trak1         | NM_175114 // Trak1 // trafficking protein, kinesin binding 1 // 9 F4 9 71.0 cM / | 0,0130897 | -1,23009 |
| Ammecr1       | NM_019496 // Ammecr1 // Alport syndrome, mental retardation, midface hypoplasia  | 0,0131484 | -1,21467 |
| Dennd4b       | NM_201407 // Dennd4b // DENN/MADD domain containing 4B // 3 F1 // 229541 /// ENS | 0,0131961 | -1,21948 |
| Sp4           | NM_009239 // Sp4 // trans-acting transcription factor 4 // 12 F2 12 60.0 cM // 2 | 0,0132305 | -1,2305  |
| Tmem209       | NM_178625 // Tmem209 // transmembrane protein 209 // 6 A3.3 // 72649 /// ENSMUST | 0,0132368 | -1,28482 |
| Tmem229b      | NM_178745 // Tmem229b // transmembrane protein 229B // 12 C3 // 268567 /// NM_00 | 0,0132718 | -1,22782 |
| Wdr81         | NM_138950 // Wdr81 // WD repeat domain 81 // 11 B5 // 192652 /// ENSMUST00000117 | 0,0132889 | -1,2572  |
| Chrm1         | NM_001112697 // Chrm1 // cholinergic receptor, muscarinic 1, CNS // 19 A // 1266 | 0,0132916 | -1,24422 |
| Snora3        | NR_028079 // Snora3 // small nucleolar RNA, H/ACA box 3 // --- // 100302499      | 0,0133103 | -1,42571 |
| Ulk1          | NM_009469 // Ulk1 // Unc-51 like kinase 1 (C. elegans) // 5 F // 22241 /// ENSMU | 0,0133249 | -1,27545 |
| Cpne4         | NM_028719 // Cpne4 // copine IV // 9 F1 // 74020 /// ENSMUST00000057742 // Cpne4 | 0,0133329 | -1,33314 |
| Plip          | NM_026385 // Plip // plasma membrane proteolipid // 8 C5 // 67801 /// ENSMUST000 | 0,0133475 | -1,2103  |
| Hnmpul1       | NM_144922 // Hnmpul1 // heterogeneous nuclear ribonucleoprotein U-like 1 // 7 A  | 0,0133485 | -1,26994 |
| Nit2          | NM_023175 // Nit2 // nitrilase family, member 2 // 16 C1.1 16 38.0 cM // 52633 / | 0,0133487 | -1,25164 |
| Myst3         | NM_001081149 // Myst3 // MYST histone acetyltransferase (monocytic leukemia) 3 / | 0,0133686 | -1,21833 |

|               |                                                                                  |           |          |
|---------------|----------------------------------------------------------------------------------|-----------|----------|
| Gpr27         | NM_008158 // Gpr27 // G protein-coupled receptor 27 // 6 E1 // 14761 // ENSMUST  | 0,0133958 | -1,26402 |
| Sox9          | NM_011448 // Sox9 // SRY-box containing gene 9 // 11 E2[11 69.5 cM // 20682 //   | 0,013398  | -1,27259 |
| Arhgef6       | NM_152801 // Arhgef6 // Rac/Cdc42 guanine nucleotide exchange factor (GEF) 6 //  | 0,0134188 | -1,2323  |
| Aco1          | NM_007386 // Aco1 // aconitase 1 // 4 A5[4 20.9 cM // 11428 // ENSMUST00001029   | 0,0134322 | -1,21331 |
| Map4k4        | NM_008696 // Map4k4 // mitogen-activated protein kinase kinase kinase 4 /        | 0,0134421 | -1,24745 |
| Sreb2         | NM_033218 // Sreb2 // sterol regulatory element binding factor 2 // 15 E1 // 20  | 0,0134468 | -1,23752 |
| Fut10         | NM_134161 // Fut10 // fucosyltransferase 10 // 8 A3 // 171167 // NM_001012517 /  | 0,0134569 | -1,22341 |
| Add2          | NM_013458 // Add2 // adducin 2 (beta) // 6 D1[6 35.0 cM // 11519 // ENSMUST0000  | 0,0134617 | -1,28054 |
| St3gal3       | NM_009176 // St3gal3 // ST3 beta-galactoside alpha-2,3-sialyltransferase 3 // 4  | 0,0134724 | -1,21722 |
| Tenc1         | NM_153533 // Tenc1 // tensin like C1 domain-containing phosphatase // 15 F3[15 5 | 0,0134733 | -1,24663 |
| Scamp3        | NM_011886 // Scamp3 // secretory carrier membrane protein 3 // 3 F2 // 24045 //  | 0,013482  | -1,25992 |
| Ppp1r11       | NM_029632 // Ppp1r11 // protein phosphatase 1, regulatory (inhibitor) subunit 11 | 0,0134934 | -1,2523  |
| Sync          | NM_023485 // Sync // syncollin // 4 D2.2[4 60.0 cM // 68828 // ENSMUST000001025  | 0,0135231 | -1,23681 |
| Trerf1        | NM_001097623 // Trerf1 // transcriptional regulating factor 1 // 17 C // 224829  | 0,0135598 | -1,30653 |
| Pvr13         | NM_021496 // Pvr13 // poliovirus receptor-related 3 // 16 B5 // 58998 // NM_021  | 0,0135651 | -1,2875  |
| Herpud2       | NM_020586 // Herpud2 // HERPUD family member 2 // 9 A4 // 80517 // ENSMUST00000  | 0,0135686 | -1,22401 |
| Fam59a        | NM_001033445 // Fam59a // family with sequence similarity 59, member A // 18 A2  | 0,0135741 | -1,25162 |
| Auts2         | NM_177047 // Auts2 // autism susceptibility candidate 2 // 5 G2 // 319974 // EN  | 0,0136592 | -1,32309 |
| Apeh          | NM_146226 // Apeh // acylpeptide hydrolase // 9 F2 // 235606 // ENSMUST000000081 | 0,0137275 | -1,20006 |
| Pias3         | NM_146135 // Pias3 // protein inhibitor of activated STAT 3 // 3 F2.1 // 229615  | 0,0137807 | -1,22108 |
| Dlgap3        | NM_198618 // Dlgap3 // discs, large (Drosophila) homolog-associated protein 3 // | 0,0138115 | -1,23359 |
| Csrp1         | NM_007791 // Csrp1 // cysteine and glycine-rich protein 1 // 1 E4 // 13007 // E  | 0,0138146 | -1,21014 |
| Lef1          | NM_010703 // Lef1 // lymphoid enhancer binding factor 1 // 3 G3[3 61.6 cM // 168 | 0,0138298 | -1,21325 |
| D430042O09Rik | BC158019 // D430042O09Rik // RIKEN cDNA D430042O09 gene // 7 F3 // 233865 // BC  | 0,0138498 | -1,26568 |
| Irak2         | NM_172161 // Irak2 // interleukin-1 receptor-associated kinase 2 // 6 E3[6 49.5  | 0,013852  | -1,20922 |
| Rere          | NM_001085492 // Rere // arginine glutamic acid dipeptide (RE) repeats // 4 E2[4  | 0,0138523 | -1,33662 |
| Zxdb          | NM_001081473 // Zxdb // zinc finger, X-linked, duplicated B // X C3 // 668166 // | 0,0138806 | -1,21328 |
| Dock6         | NM_177030 // Dock6 // dedicator of cytokinesis 6 // 9 A3 // 319899 // ENSMUST00  | 0,0138996 | -1,30938 |
| Tbc1d9b       | NM_029745 // Tbc1d9b // TBC1 domain family, member 9B // 11 B1.3 // 76795 // EN  | 0,0139094 | -1,24472 |
| Osbp2         | NM_152818 // Osbp2 // oxysterol binding protein 2 // 11 A1 // 74309 // ENSMUST0  | 0,0139375 | -1,2042  |
| Kcng2         | ENSMUST00000077962 // Kcng2 // potassium voltage-gated channel, subfamily G, mem | 0,0139692 | -1,31192 |
| Nt5c1a        | NM_001085502 // Nt5c1a // 5'-nucleotidase, cytosolic 1A // 4 D2.2 // 230718 //   | 0,013985  | -1,20933 |
| Gnl1          | NM_008136 // Gnl1 // guanine nucleotide binding protein-like 1 // 17 C-D[17 19.7 | 0,0139862 | -1,21176 |
| Sipa1l2       | NM_001081337 // Sipal12 // signal-induced proliferation-associated 1 like 2 // 8 | 0,0139968 | -1,22715 |
| Trim46        | NM_183037 // Trim46 // tripartite motif-containing 46 // 3 F1 // 360213 // NM_0  | 0,0140086 | -1,24868 |
| Mex3d         | NM_198615 // Mex3d // mex3 homolog D (C. elegans) // 10 C1 // 237400 // ENSMUST  | 0,0140214 | -1,23416 |
| Parvb         | NM_133167 // Parvb // parvin, beta // 15 E3 // 170736 // ENSMUST00000023072 //   | 0,0140838 | -1,32497 |
| Mast1         | NM_019945 // Mast1 // microtubule associated serine/threonine kinase 1 // 8 C3[8 | 0,0141027 | -1,41127 |
| Neur1B        | NM_001081656 // Neur1B // neuralized homolog 1B (Drosophila) // 17 A3.3[17 // 2  | 0,0141069 | -1,3193  |
| Olf1r1134     | NM_147030 // Olf1r1134 // olfactory receptor 1134 // --- // 259032 // ENSMUST000 | 0,0141227 | -1,28598 |
| Decr2         | NM_011933 // Decr2 // 2,4-dienoyl-Coenzyme A reductase 2, peroxisomal // 17 B1[1 | 0,0141366 | -1,27344 |
| Abcg1         | NM_009593 // Abcg1 // ATP-binding cassette, sub-family G (WHITE), member 1 // -- | 0,01416   | -1,2461  |
| Stau1         | NM_001109906 // Stau1 // staufer (RNA binding protein) homolog 1 (Drosophila) // | 0,0141627 | -1,20196 |
| Clstn3        | NM_153508 // Clstn3 // calyntenin 3 // 6 F2 // 232370 // ENSMUST00000008297 //   | 0,0141798 | -1,20602 |
| Grin1         | NM_008169 // Grin1 // glutamate receptor, ionotropic, NMDA1 (zeta 1) // 2 A3[2 1 | 0,0141898 | -1,20836 |

|               |                                                                                  |           |          |
|---------------|----------------------------------------------------------------------------------|-----------|----------|
| Cyfp1         | NM_001164661 // Cyfp1 // cytoplasmic FMR1 interacting protein 1 // 7 B5 // 2043  | 0,0141987 | -1,23425 |
| Epb4.11l      | NM_013510 // Epb4.11l // erythrocyte protein band 4.1-like 1 // 2 H1 2 88.0 cM / | 0,0142094 | -1,23606 |
| Ubp2          | NM_026872 // Ubp2 // ubiquitin-associated protein 2 // 4 A5 // 68926 // ENSMUS   | 0,0142367 | -1,28219 |
| Epb4.14b      | NM_019427 // Epb4.14b // erythrocyte protein band 4.1-like 4b // 4 B3 4 26.0 cM  | 0,0142602 | -1,25487 |
| Rnf144b       | NM_146042 // Rnf144b // ring finger protein 144B // 13 A5 // 218215 // NM_00117  | 0,0142758 | -1,30892 |
| 300002C10Rik  | NR_033215 // 300002C10Rik // glyceraldehyde-3-phosphate dehydrogenase pseudogen  | 0,0142779 | -1,21905 |
| Eml6          | NM_146016 // Eml6 // echinoderm microtubule associated protein like 6 // 11 A3.3 | 0,0143006 | -1,24854 |
| Psen2         | NM_011183 // Psen2 // presenilin 2 // 1 H4 1 101.0 cM // 19165 // NM_001128605   | 0,0143084 | -1,22733 |
| Gm13931       | XM_001003833 // Gm13931 // predicted gene 13931 // 2 E3 // 668825                | 0,0143197 | -1,26884 |
| Spen          | NM_019763 // Spen // SPEN homolog, transcriptional regulator (Drosophila) // --- | 0,0143208 | -1,22703 |
| Ggps1         | NM_010282 // Ggps1 // geranylgeranyl diphosphate synthase 1 // 13 A1 13 8.0 cM / | 0,0143484 | -1,21855 |
| Cd2ap         | NM_009847 // Cd2ap // CD2-associated protein // 17 B3 // 12488 // ENSMUST000000  | 0,0143761 | -1,23713 |
| Fads2         | NM_019699 // Fads2 // fatty acid desaturase 2 // 19 B // 56473 // ENSMUST000000  | 0,0143874 | -1,27534 |
| Aldh11        | NM_027406 // Aldh11 // aldehyde dehydrogenase 1 family, member L1 // 6 D1 // 10  | 0,0143944 | -1,23285 |
| Syde1         | NM_027875 // Syde1 // synapse defective 1, Rho GTPase, homolog 1 (C. elegans) // | 0,0144545 | -1,28261 |
| Sec14l1       | NM_001166506 // Sec14l1 // SEC14-like 1 (S. cerevisiae) // 11 E2 // 74136 // NM  | 0,0144869 | -1,22423 |
| Plcg1         | NM_021280 // Plcg1 // phospholipase C, gamma 1 // 2 H2 2 92.0 cM // 18803 // EN  | 0,014517  | -1,2374  |
| Erbp2ip       | NM_001005868 // Erbp2ip // Erbb2 interacting protein // 13 D1 // 59079 // NM_02  | 0,0145204 | -1,38655 |
| Tatdn2        | NM_001033463 // Tatdn2 // TatD DNase domain containing 2 // 6 E3 6 49.6 cM // 38 | 0,0145357 | -1,20857 |
| Atg2a         | NM_194348 // Atg2a // ATG2 autophagy related 2 homolog A (S. cerevisiae) // 19 A | 0,0145512 | -1,31091 |
| Adipor1       | NM_028320 // Adipor1 // adiponectin receptor 1 // 1 E4 // 72674 // ENSMUST000000 | 0,0145797 | -1,22273 |
| Slc25a30      | NM_026232 // Slc25a30 // solute carrier family 25, member 30 // 14 D2 // 67554 / | 0,0145871 | -1,23167 |
| Dusp10        | NM_022019 // Dusp10 // dual specificity phosphatase 10 // 1 H5 // 63953 // ENSM  | 0,0146074 | -1,20787 |
| Srgap3        | NM_080448 // Srgap3 // SLIT-ROBO Rho GTPase activating protein 3 // 6 E3 // 2593 | 0,0146078 | -1,30412 |
| Cyp2d22       | NM_001163472 // Cyp2d22 // cytochrome P450, family 2, subfamily d, polypeptide 2 | 0,0146123 | -1,23793 |
| Arhgef2       | NM_008487 // Arhgef2 // rho/rac guanine nucleotide exchange factor (GEF) 2 // 3  | 0,0146223 | -1,24753 |
| Jmjd8         | NM_028101 // Jmjd8 // jumonji domain containing 8 // 17 B1 // 72106 // NM_01971  | 0,014627  | -1,30899 |
| Stat5b        | NM_001113563 // Stat5b // signal transducer and activator of transcription 5B // | 0,01463   | -1,21516 |
| Bcas3         | NM_138681 // Bcas3 // breast carcinoma amplified sequence 3 // 11 C // 192197 // | 0,0146416 | -1,21194 |
| Extl1         | NM_019578 // Extl1 // exostosin (multiple)-like 1 // 4 D3 4 60.0 cM // 56219 //  | 0,014656  | -1,31182 |
| Inpp4a        | NM_030266 // Inpp4a // inositol polyphosphate-4-phosphatase, type I // 1 B 1 19. | 0,0146776 | -1,23907 |
| Immp1         | NM_028260 // Immp1 // IMP1 inner mitochondrial membrane peptidase-like (S. cere  | 0,0147032 | -1,23002 |
| Top3b         | NM_011624 // Top3b // topoisomerase (DNA) III beta // 16 B1 // 21976 // ENSMUST  | 0,0147035 | -1,22526 |
| Efemp2        | NM_021474 // Efemp2 // epidermal growth factor-containing fibulin-like extracell | 0,014714  | -1,21157 |
| Esyt1         | NM_011843 // Esyt1 // extended synaptotagmin-like protein 1 // 10 D3 // 23943 // | 0,0147163 | -1,2608  |
| Dock6         | NM_177030 // Dock6 // dedicator of cytokinesis 6 // 9 A3 // 319899 // ENSMUST00  | 0,0147424 | -1,28066 |
| Cpsf7         | NM_172302 // Cpsf7 // cleavage and polyadenylation specific factor 7 // 19 A //  | 0,0147439 | -1,24775 |
| Usp20         | NM_028846 // Usp20 // ubiquitin specific peptidase 20 // 2 B // 74270 // ENSMUS  | 0,0147588 | -1,21274 |
| Zfp516        | NM_183033 // Zfp516 // zinc finger protein 516 // 18 E3 // 329003 // NM_0011774  | 0,0147811 | -1,27432 |
| Syngap1       | ENSMUST00000081285 // Syngap1 // synaptic Ras GTPase activating protein 1 homolo | 0,0147895 | -1,25099 |
| Igdcc4        | NM_020043 // Igdcc4 // immunoglobulin superfamily, DCC subclass, member 4 // 9 C | 0,0148381 | -1,29151 |
| Tmem63a       | NM_144794 // Tmem63a // transmembrane protein 63a // 1 H4 // 208795 // ENSMUST0  | 0,0148774 | -1,23822 |
| Zxdc          | NM_173002 // Zxdc // ZXD family zinc finger C // 6 D1 6 // 80292 // NM_030260 /  | 0,014901  | -1,20376 |
| Brd1          | NM_001033274 // Brd1 // bromodomain containing 1 // 15 E3 // 223770 // BC130273  | 0,0149655 | -1,20748 |
| B230208H17Rik | NM_001024616 // B230208H17Rik // RIKEN cDNA B230208H17 gene // 2 A3 // 227624 // | 0,0150041 | -1,23458 |



|               |                                                                                  |           |          |
|---------------|----------------------------------------------------------------------------------|-----------|----------|
| Ctnnd2        | NM_008729 // Ctnnd2 // catenin (cadherin associated protein), delta 2 // 15 B2 / | 0,0150047 | -1,23104 |
| Adrbk2        | NM_177078 // Adrbk2 // adrenergic receptor kinase, beta 2 // 5 FJ5 60.0 cM // 32 | 0,0150127 | -1,23803 |
| Hdac5         | NM_001077696 // Hdac5 // histone deacetylase 5 // 11 D // 15184 /// NM_010412 // | 0,0150844 | -1,27094 |
| 9930021J03Rik | NM_172836 // 9930021J03Rik // RIKEN cDNA 9930021J03 gene // 19 C1 // 240613      | 0,0150987 | -1,25836 |
| Agpat2        | NM_026212 // Agpat2 // 1-acylglycerol-3-phosphate O-acyltransferase 2 (lysophosp | 0,0151133 | -1,21571 |
| Pigq          | NM_011822 // Pigq // phosphatidylinositol glycan anchor biosynthesis, class Q // | 0,0151301 | -1,28472 |
| Kcnj8         | NM_008428 // Kcnj8 // potassium inwardly-rectifying channel, subfamily J, member | 0,0151559 | -1,20296 |
| Sbf2          | NM_177324 // Sbf2 // SET binding factor 2 // 7 F2 // 319934 /// ENSMUST000000330 | 0,0151668 | -1,25543 |
| Scyl1         | NM_023912 // Scyl1 // SCY1-like 1 (S. cerevisiae) // 19 A // 78891 /// ENSMUST00 | 0,0151677 | -1,21332 |
| Map4k2        | NM_009006 // Map4k2 // mitogen-activated protein kinase kinase kinase 2 /        | 0,0151962 | -1,25036 |
| Atn1          | NM_007881 // Atn1 // atrophin 1 // 6 F2J6 60.21 cM // 13498 /// NR_024201 // Rnu | 0,0152359 | -1,34003 |
| Snora3        | NR_028079 // Snora3 // small nucleolar RNA, H/ACA box 3 // --- // 100302499      | 0,0152713 | -1,42689 |
| Ptprt         | NM_021464 // Ptprt // protein tyrosine phosphatase, receptor type, T // 2 H2J2 9 | 0,0152951 | -1,27696 |
| Pemt          | NM_008819 // Pemt // phosphatidylethanolamine N-methyltransferase // 11 B1.3J11  | 0,0153015 | -1,21191 |
| Cherp         | NM_138585 // Cherp // calcium homeostasis endoplasmic reticulum protein // 8 B3. | 0,0154166 | -1,26654 |
| Dopey2        | NM_027293 // Dopey2 // dopey family member 2 // 16 C4 // 70028 /// NM_026700 //  | 0,0154589 | -1,261   |
| Ints5         | NM_176843 // Ints5 // integrator complex subunit 5 // 19 A // 109077 /// ENSMUST | 0,0154666 | -1,22665 |
| Slc6a20a      | NM_139142 // Slc6a20a // solute carrier family 6 (neurotransmitter transporter), | 0,0155223 | -1,41354 |
| Pkd2          | NM_008861 // Pkd2 // polycystic kidney disease 2 // 5 E5J5 55.0 cM // 18764 ///  | 0,0155479 | -1,24216 |
| Meis2         | NM_001136072 // Meis2 // Meis homeobox 2 // 2 E4-E5J2 64.0 cM // 17536 /// NM_00 | 0,0155546 | -1,27765 |
| Fzd3          | NM_021458 // Fzd3 // frizzled homolog 3 (Drosophila) // 14 D1J14 27.0 cM // 1436 | 0,0155732 | -1,28213 |
| Serp1         | NM_030685 // Serp1 // stress-associated endoplasmic reticulum protein 1 // 3 DJ3 | 0,0156022 | -1,22158 |
| Tln2          | NM_001081242 // Tln2 // talin 2 // 9 C // 70549 /// ENSMUST00000040025 // Tln2 / | 0,0156165 | -1,25177 |
| Arid1a        | NM_001080819 // Arid1a // AT rich interactive domain 1A (SWI-like) // 4 D3 // 93 | 0,0156167 | -1,31074 |
| Fxr2          | NM_011814 // Fxr2 // fragile X mental retardation, autosomal homolog 2 // 11 B3J | 0,0156231 | -1,21334 |
| Pdgfra        | NM_011058 // Pdgfra // platelet derived growth factor receptor, alpha polypeptid | 0,0156345 | -1,24325 |
| Wfikkn2       | NM_181819 // Wfikkn2 // WAP, follistatin/kazal, immunoglobulin, kunitz and netri | 0,0156548 | -1,20316 |
| Raver2        | NM_183024 // Raver2 // ribonucleoprotein, PTB-binding 2 // 4 C6 // 242570 /// EN | 0,015673  | -1,29358 |
| Shroom1       | NM_027917 // Shroom1 // shroom family member 1 // 11 B1.3 // 71774 /// ENSMUST00 | 0,0156981 | -1,28064 |
| Abat          | NM_172961 // Abat // 4-aminobutyrate aminotransferase // 16 A3 // 268860 /// NM_ | 0,0157071 | -1,27016 |
| Phc1          | NM_007905 // Phc1 // polyhomeotic-like 1 (Drosophila) // 6 F3J6 57.0 cM // 13619 | 0,0157369 | -1,26755 |
| Hipk4         | NM_001033315 // Hipk4 // homeodomain interacting protein kinase 4 // 7 A3 // 233 | 0,0157477 | -1,23166 |
| Phc3          | NM_001165954 // Phc3 // polyhomeotic-like 3 (Drosophila) // 3 A3 // 241915 /// N | 0,015753  | -1,27343 |
| Baz2b         | NM_001001182 // Baz2b // bromodomain adjacent to zinc finger domain, 2B // 2 C1. | 0,015759  | -1,20723 |
| Gdf11         | NM_010272 // Gdf11 // growth differentiation factor 11 // --- // 14561 /// ENSMU | 0,0158021 | -1,30681 |
| Hdac6         | NM_010413 // Hdac6 // histone deacetylase 6 // X A1.1X 2.0 cM // 15185 /// NM_0  | 0,0158259 | -1,25006 |
| Atp6v0a2      | NM_011596 // Atp6v0a2 // ATPase, H+ transporting, lysosomal V0 subunit A2 // 5 F | 0,0158513 | -1,21068 |
| Srrm4         | NM_026886 // Srrm4 // serine/arginine repetitive matrix 4 // 5 F // 68955 /// EN | 0,0158831 | -1,31869 |
| Rmi1          | NR_031761 // Rmi1 // RMI1, RecQ mediated genome instability 1, homolog (S. cerev | 0,0158954 | -1,2772  |
| Trps1         | NM_032000 // Trps1 // trichorhinophalangeal syndrome I (human) // 15 CJ15 30.1 c | 0,0159303 | -1,23354 |
| Kcnt1         | NM_175462 // Kcnt1 // potassium channel, subfamily T, member 1 // 2 A3 // 227632 | 0,0159442 | -1,21742 |
| Zswim5        | NM_001029912 // Zswim5 // zinc finger, SWIM domain containing 5 // 4 D1 // 74464 | 0,0159726 | -1,30769 |
| Pch2          | NM_175556 // Pch2 // phospholipase C, eta 2 // 4 E2 // 269615 /// NM_001113360   | 0,0159749 | -1,22417 |
| Furin         | NM_011046 // Furin // furin (paired basic amino acid cleaving enzyme) // 7 D1-E2 | 0,0159825 | -1,21887 |
| Sec24b        | NM_207209 // Sec24b // Sec24 related gene family, member B (S. cerevisiae) // 3  | 0,016004  | -1,2232  |

|               |                                                                                  |           |          |
|---------------|----------------------------------------------------------------------------------|-----------|----------|
| Pld2          | NM_008876 // Pld2 // phospholipase D2 // 11 B3 11 39.0 cM // 18806 /// ENSMUST00 | 0,0160247 | -1,2832  |
| Fam123c       | NM_213727 // Fam123c // family with sequence similarity 123, member C // 1 B //  | 0,016036  | -1,2911  |
| 1810037117Rik | NM_024461 // 1810037117Rik // RIKEN cDNA 1810037117 gene // 3 G1 // 67704 /// EN | 0,0160471 | -1,27016 |
| Adamts3       | NM_177872 // Adamts3 // a disintegrin-like and metallopeptidase (reprolysin type | 0,0160606 | -1,24967 |
| Ncoa2         | NM_008678 // Ncoa2 // nuclear receptor coactivator 2 // 1 A3-A5 1 1.0 cM // 1797 | 0,0160646 | -1,20532 |
| Gng12         | NM_001177560 // Gng12 // guanine nucleotide binding protein (G protein), gamma 1 | 0,0160794 | -1,25797 |
| Wdr48         | NM_026236 // Wdr48 // WD repeat domain 48 // 9 F4 // 67561 /// NM_028976 // Gora | 0,0160814 | -1,2299  |
| Magi1         | NM_001029850 // Magi1 // membrane associated guanylate kinase, WW and PDZ domain | 0,016092  | -1,22694 |
| Lama3         | NM_010680 // Lama3 // laminin, alpha 3 // 18 A 18 3.0 cM // 16774 /// ENSMUST000 | 0,0161204 | -1,26371 |
| Zfp202        | NM_030713 // Zfp202 // zinc finger protein 202 // 9 B // 80902 /// ENSMUST000000 | 0,0161286 | -1,23049 |
| Fam63a        | BC094388 // Fam63a // family with sequence similarity 63, member A // 3 F2 // 75 | 0,0161302 | -1,25376 |
| Eif2c1        | NM_153403 // Eif2c1 // eukaryotic translation initiation factor 2C, 1 // 4 D2.2  | 0,0161324 | -1,2332  |
| Sox12         | NM_011438 // Sox12 // SRY-box containing gene 12 // 2 G3 // 20667 /// ENSMUST000 | 0,0162076 | -1,21844 |
| Fyn           | NM_001122893 // Fyn // Fyn proto-oncogene // 10 B1 10 25.0 cM // 14360 /// NM_00 | 0,0162157 | -1,25311 |
| Ankrd52       | NM_172790 // Ankrd52 // ankyrin repeat domain 52 // 10 D3 // 237615 /// ENSMUST0 | 0,016217  | -1,24837 |
| Rims1         | NM_053270 // Rims1 // regulating synaptic membrane exocytosis 1 // -- // 116837  | 0,0162471 | -1,21705 |
| Ppm1a         | NM_008910 // Ppm1a // protein phosphatase 1A, magnesium dependent, alpha isoform | 0,0162542 | -1,2357  |
| Adamts3       | NM_177872 // Adamts3 // a disintegrin-like and metallopeptidase (reprolysin type | 0,0162694 | -1,24024 |
| Ets1          | NM_011808 // Ets1 // E26 avian leukemia oncogene 1, 5' domain // 9 A4 9 15.0 cM  | 0,0162786 | -1,20746 |
| Plscr2        | NM_008880 // Plscr2 // phospholipid scramblase 2 // 9 E3.3 // 18828 /// ENSMUST0 | 0,0162798 | -1,25998 |
| Ep400         | NM_029337 // Ep400 // E1A binding protein p400 // 5 F // 75560 /// NM_173066 //  | 0,0162934 | -1,26955 |
| Gys1          | NM_030678 // Gys1 // glycogen synthase 1, muscle // 7 B4 7 23.0 cM // 14936 //   | 0,0163043 | -1,20116 |
| Wwc2          | NM_133791 // Wwc2 // WW, C2 and coiled-coil domain containing 2 // 8 B1.1 8 30.0 | 0,016337  | -1,24251 |
| Mlec          | NM_175403 // Mlec // malectin // 5 F 5 60.0 cM // 109154 /// ENSMUST00000112121  | 0,0163656 | -1,21639 |
| Enah          | NM_010135 // Enah // enabled homolog (Drosophila) // 1 H5 1 98.7 cM // 13800 //  | 0,016369  | -1,24058 |
| 1110018G07Rik | NM_178065 // 1110018G07Rik // RIKEN cDNA 1110018G07 gene // 12 D2 // 68497 /// E | 0,0164275 | -1,23888 |
| Arfgef2       | NM_001085495 // Arfgef2 // ADP-ribosylation factor guanine nucleotide-exchange f | 0,016449  | -1,22765 |
| Acox3         | NM_030721 // Acox3 // acyl-Coenzyme A oxidase 3, pristanoyl // -- // 80911 //    | 0,016463  | -1,20149 |
| Rasal2        | NM_177644 // Rasal2 // RAS protein activator like 2 // 1 H1 // 226525 /// ENSMUS | 0,0164841 | -1,21206 |
| Ptprs         | NM_011218 // Ptprs // protein tyrosine phosphatase, receptor type, S // 17 D 17  | 0,0165079 | -1,20971 |
| Srgap3        | NM_080448 // Srgap3 // SLIT-ROBO Rho GTPase activating protein 3 // 6 E3 // 2593 | 0,0165308 | -1,22057 |
| Agt           | NM_007428 // Agt // angiotensinogen (serpin peptidase inhibitor, clade A, member | 0,0165685 | -1,22549 |
| 4931428F04Rik | NM_028888 // 4931428F04Rik // RIKEN cDNA 4931428F04 gene // 8 D3 // 74356 /// NM | 0,0166397 | -1,28437 |
| Dab2          | NM_023118 // Dab2 // disabled homolog 2 (Drosophila) // 15 A 15 6.7 cM // 13132  | 0,0166438 | -1,37199 |
| Tmem8b        | NM_001085508 // Tmem8b // transmembrane protein 8B // 4 B1 // 242409 /// ENSMUST | 0,0166523 | -1,25748 |
| Cbx6-Nptxr    | NM_001013362 // Cbx6-Nptxr // Cbx6-Nptxr readthrough transcripts // 15E2 // 5041 | 0,0166827 | -1,24831 |
| Gm2a          | NM_010299 // Gm2a // GM2 ganglioside activator protein // 11 B1.3 11 29.0 cM //  | 0,0167066 | -1,20043 |
| Uggt1         | NM_198899 // Uggt1 // UDP-glucose glycoprotein glucosyltransferase 1 // 1 B // 3 | 0,0167135 | -1,20735 |
| Paqr8         | NM_028829 // Paqr8 // progestin and adipoQ receptor family member VIII // 1 A5 / | 0,0167188 | -1,21943 |
| Tiam1         | NM_009384 // Tiam1 // T-cell lymphoma invasion and metastasis 1 // 16 61.8 cM // | 0,0167204 | -1,38102 |
| Syng1         | NM_207708 // Syng1 // synaptogyrin 1 // 15 E1 // 20972 /// NM_009303 // Syng1    | 0,0167281 | -1,20064 |
| Trp53inp2     | NM_178111 // Trp53inp2 // transformation related protein 53 inducible nuclear pr | 0,0167285 | -1,3121  |
| Tek           | NM_013690 // Tek // endothelial-specific receptor tyrosine kinase // 4 C5 4 43.6 | 0,0167322 | -1,20679 |
| Ubiad1        | NM_027873 // Ubiad1 // UbiA prenyltransferase domain containing 1 // 4 E1 // 717 | 0,016756  | -1,23122 |
| Stc1          | NM_009285 // Stc1 // stanniocalcin 1 // 14 D2 // 20855 /// ENSMUST00000014957 // | 0,0167723 | -1,27294 |

|               |                                                                                   |           |          |
|---------------|-----------------------------------------------------------------------------------|-----------|----------|
| Gpx8          | NM_027127 // Gpx8 // glutathione peroxidase 8 (putative) // 13 D2.2 // 69590 ///  | 0,0167804 | -1,2497  |
| Leng8         | NM_172736 // Leng8 // leukocyte receptor cluster (LRC) member 8 // 7 A1 // 23279  | 0,0167806 | -1,22388 |
| Vangl2        | NM_033509 // Vangl2 // vang-like 2 (van gogh, Drosophila) // 1 H3 1 93.4 cM // 9  | 0,0168095 | -1,26112 |
| Rab11fip5     | NM_001003955 // Rab11fip5 // RAB11 family interacting protein 5 (class I) // 6 C  | 0,0168104 | -1,25565 |
| C530028O21Rik | NM_175696 // C530028O21Rik // RIKEN cDNA C530028O21 gene // 6 F2 // 319352 /// N  | 0,0168232 | -1,312   |
| Crmp1         | NM_007765 // Crmp1 // collapsin response mediator protein 1 // 5 B3 5 21.0 cM //  | 0,0168277 | -1,308   |
| Myst4         | NM_017479 // Myst4 // MYST histone acetyltransferase monocytic leukemia 4 // 14   | 0,016828  | -1,22675 |
| Fam102a       | NM_153560 // Fam102a // family with sequence similarity 102, member A // 2 B //   | 0,0168564 | -1,3276  |
| Sec11a        | NM_019951 // Sec11a // SEC11 homolog A (S. cerevisiae) // 7 D3 // 56529 /// ENSM  | 0,0168876 | -1,20956 |
| Ntng2         | NM_133501 // Ntng2 // netrin G2 // 2 B 2 18.0 cM // 171171 /// NM_133500 // Ntng  | 0,0169013 | -1,22194 |
| Cbx4          | NM_007625 // Cbx4 // chromobox homolog 4 (Drosophila Pc class) // 11 E2 11 79.5   | 0,0169052 | -1,21974 |
| Gm5039        | NR_003647 // Gm5039 // eukaryotic translation initiation factor 1A pseudogene //  | 0,0169099 | -1,21648 |
| Ppm1d         | NM_016910 // Ppm1d // protein phosphatase 1D magnesium-dependent, delta isoform   | 0,0169107 | -1,20164 |
| Sema6a        | NM_018744 // Sema6a // sema domain, transmembrane domain (TM), and cytoplasmic d  | 0,0169131 | -1,48302 |
| Wnk2          | NM_029361 // Wnk2 // WNK lysine deficient protein kinase 2 // 13 B1 // 75607 ///  | 0,0169325 | -1,26796 |
| Shank3        | NM_021423 // Shank3 // SH3/ankyrin domain gene 3 // 15 E3 // 58234 /// ENSMUST00  | 0,0169467 | -1,26917 |
| Slc7a10       | NM_017394 // Slc7a10 // solute carrier family 7 (cationic amino acid transporter  | 0,0169522 | -1,28334 |
| Jph4          | NM_177049 // Jph4 // junctophilin 4 // 14 C3 // 319984 /// NM_001003829 // Jph4   | 0,016957  | -1,30373 |
| Adarb1        | NR_004429 // Adarb1 // adenosine deaminase, RNA-specific, B1 // 10 41.4 cM // 11  | 0,0169635 | -1,21612 |
| Fam120a       | NM_001033268 // Fam120a // family with sequence similarity 120, member A // 13 A  | 0,0169712 | -1,32272 |
| Otud7a        | NM_130880 // Otud7a // OTU domain containing 7A // 7 C // 170711 /// ENSMUST0000  | 0,0169824 | -1,22561 |
| Hipk3         | NM_010434 // Hipk3 // homeodomain interacting protein kinase 3 // 2 E2 // 15259   | 0,0170069 | -1,22424 |
| Pip4k2b       | NM_054051 // Pip4k2b // phosphatidylinositol-5-phosphate 4-kinase, type II, beta  | 0,0170888 | -1,24011 |
| Prrt3         | NM_172487 // Prrt3 // proline-rich transmembrane protein 3 // 6 E3 // 210673 ///  | 0,0170907 | -1,2127  |
| Wwp2          | NM_025830 // Wwp2 // WW domain containing E3 ubiquitin protein ligase 2 // 8 D3   | 0,0170945 | -1,22574 |
| Mtap1a        | NM_032393 // Mtap1a // microtubule-associated protein 1 A // 2 E5 2 67.5 cM // 1  | 0,0171004 | -1,23608 |
| Csf2ra        | NM_009970 // Csf2ra // colony stimulating factor 2 receptor, alpha, low-affinity  | 0,0171053 | -1,31727 |
| Sez6l2        | NM_144926 // Sez6l2 // seizure related 6 homolog like 2 // 7 F3 // 233878 /// EN  | 0,0171287 | -1,25457 |
| Fbxo21        | NM_145564 // Fbxo21 // F-box protein 21 // 5 F // 231670 /// ENSMUST00000035579   | 0,0171474 | -1,25082 |
| Gtf3c1        | NM_207239 // Gtf3c1 // general transcription factor III C 1 // 7 F3 // 233863 //  | 0,0171596 | -1,22357 |
| Arhgef10l     | NM_172415 // Arhgef10l // Rho guanine nucleotide exchange factor (GEF) 10-like /  | 0,0171602 | -1,20498 |
| Plexna1       | NM_008881 // Plexna1 // plexin A1 // --- // 18844 /// ENSMUST0000049845 // Plexna | 0,0172099 | -1,3538  |
| Adat2         | NM_025748 // Adat2 // adenosine deaminase, tRNA-specific 2, TAD2 homolog (S. cer  | 0,0172107 | -1,21237 |
| Tnfaip1       | NM_009395 // Tnfaip1 // tumor necrosis factor, alpha-induced protein 1 (endothel  | 0,0172171 | -1,21982 |
| Prr12         | NM_175022 // Prr12 // proline rich 12 // 7 B4 // 233210 /// ENSMUST0000057293 /   | 0,0173134 | -1,43537 |
| Cachd1        | NM_198037 // Cachd1 // cache domain containing 1 // 4 C6 // 320508 /// BC058676   | 0,0173225 | -1,26939 |
| Ttc28         | NM_024477 // Ttc28 // tetratricopeptide repeat domain 28 // 5 F // 209683 /// BC  | 0,0173296 | -1,35517 |
| Slc39a12      | NM_001012305 // Slc39a12 // solute carrier family 39 (zinc transporter), member   | 0,0173325 | -1,25059 |
| Wdr13         | NR_029428 // Wdr13 // WD repeat domain 13 // X A1.1 X 2.05 cM // 73447 /// NM_02  | 0,0173461 | -1,23439 |
| Mknk2         | NM_021462 // Mknk2 // MAP kinase-interacting serine/threonine kinase 2 // 10 C1   | 0,0173607 | -1,20767 |
| Nipa1         | NM_153578 // Nipa1 // non imprinted in Prader-Willi/Angelman syndrome 1 homolog   | 0,017383  | -1,2271  |
| Zcchc14       | NM_080855 // Zcchc14 // zinc finger, CCHC domain containing 14 // 8 E1 // 142682  | 0,0173877 | -1,31034 |
| Slc39a9       | NM_026244 // Slc39a9 // solute carrier family 39 (zinc transporter), member 9 //  | 0,0173913 | -1,23609 |
| Tnpo1         | NM_178716 // Tnpo1 // transportin 1 // 13 D1 13 53.0 cM // 238799 /// NM_0010482  | 0,0174037 | -1,30997 |
| Fmc1          | NM_025363 // Fmc1 // formation of mitochondrial complexes 1 homolog (S. cerevisi  | 0,0174305 | -1,21745 |

|               |                                                                                   |           |          |
|---------------|-----------------------------------------------------------------------------------|-----------|----------|
| 1110003E01Rik | BC009097 // 1110003E01Rik // RIKEN cDNA 1110003E01 gene // 5 C3.1 // 68552 /// N  | 0,0174447 | -1,21523 |
| Sbf1          | NM_001170561 // Sbf1 // SET binding factor 1 // 15 F1 // 77980 /// NM_001081030   | 0,0174521 | -1,24161 |
| Dnmt1         | NM_010066 // Dnmt1 // DNA methyltransferase (cytosine-5) 1 // 9 A3 9 5.0 cM // 1  | 0,0174749 | -1,25087 |
| Tns1          | NM_027884 // Tns1 // tensin 1 // 1 C3 1 44.5 cM // 21961                          | 0,0174789 | -1,30021 |
| D430041D05Rik | NM_001033347 // D430041D05Rik // RIKEN cDNA D430041D05 gene // 2 E2 2 57.9 cM //  | 0,0174847 | -1,24756 |
| A630072M18Rik | NR_030699 // A630072M18Rik // RIKEN cDNA A630072M18 gene // --- // 320770         | 0,0175082 | -1,2383  |
| Dock6         | NM_177030 // Dock6 // dedicator of cytokinesis 6 // 9 A3 // 319899 /// ENSMUST00  | 0,0175234 | -1,31593 |
| Cacng4        | NM_019431 // Cacng4 // calcium channel, voltage-dependent, gamma subunit 4 // 11  | 0,017538  | -1,26491 |
| Gin1          | NM_026250 // Gin1 // gypsy retrotransposon integrase 1 // 1 D // 252876 /// ENSM  | 0,0175819 | -1,20297 |
| Bace1         | NM_011792 // Bace1 // beta-site APP cleaving enzyme 1 // 9 A5.2 // 23821 /// NM_  | 0,0175831 | -1,2706  |
| Tcn2          | NM_015749 // Tcn2 // transcobalamin 2 // 11 A1 11 3.0 cM // 21452 /// NM_00111304 | 0,017651  | -1,2513  |
| Hmgxb3        | ENSMUST00000025524 // Hmgxb3 // HMG box domain containing 3 // 18 E1 // 106894 /  | 0,0176842 | -1,23821 |
| Kctd16        | NM_026135 // Kctd16 // potassium channel tetramerisation domain containing 16 //  | 0,0177005 | -1,20939 |
| Btf3l4        | NM_027453 // Btf3l4 // basic transcription factor 3-like 4 // 4 C7 // 70533 ///   | 0,0177008 | -1,23401 |
| Iqsec2        | NM_001005475 // Iqsec2 // IQ motif and Sec7 domain 2 // X F3 X 64.0 cM // 245666  | 0,0177546 | -1,37985 |
| Lss           | NM_146006 // Lss // lanosterol synthase // 10 C1 10 41.1 cM // 16987 /// ENSMUST  | 0,0177548 | -1,31118 |
| Gm996         | NM_001005424 // Gm996 // predicted gene 996 // 2 A3 // 381353 /// ENSMUST0000011  | 0,0178421 | -1,24155 |
| Prdm16        | NM_027504 // Prdm16 // PR domain containing 16 // 4 E2 // 70673 /// NM_001177995  | 0,0178746 | -1,20983 |
| Lgals4        | NM_010706 // Lgals4 // lectin, galactose binding, soluble 4 // 7 A3 7 4.0 cM //   | 0,0179131 | -1,20397 |
| Chd7          | NM_001081417 // Chd7 // chromodomain helicase DNA binding protein 7 // 4 A1 4 1.  | 0,0179136 | -1,29982 |
| Svil          | NM_153153 // Svil // supervillin // 18 A1 // 225115 /// ENSMUST00000025079 // Sv  | 0,0179241 | -1,20204 |
| Dci           | NM_010023 // Dci // dodecenoyl-Coenzyme A delta isomerase (3,2 trans-enoyl-Coeny  | 0,0179241 | -1,20086 |
| Dlgap4        | NM_146128 // Dlgap4 // discs, large homolog-associated protein 4 (Drosophila) //  | 0,0180324 | -1,2389  |
| Wnk1          | NM_198703 // Wnk1 // WNK lysine deficient protein kinase 1 // 6 F1 // 232341 ///  | 0,0180331 | -1,25951 |
| Tmem45a       | NM_019631 // Tmem45a // transmembrane protein 45a // 16 C1.1 // 56277 /// ENSMUS  | 0,0180488 | -1,23367 |
| Ppif          | NM_134084 // Ppif // peptidylprolyl isomerase F (cyclophilin F) // 14 A3 // 1056  | 0,0180615 | -1,21334 |
| Pdpx          | NM_020271 // Pdpx // pyridoxal (pyridoxine, vitamin B6) phosphatase // 15 E1 //   | 0,0180665 | -1,26476 |
| Zmynd8        | NM_027230 // Zmynd8 // zinc finger, MYND-type containing 8 // 2 H3 // 228880 ///  | 0,0180746 | -1,22281 |
| Stard13       | NM_001163493 // Stard13 // STAR-related lipid transfer (START) domain containing  | 0,0180749 | -1,25058 |
| Zic2          | NM_009574 // Zic2 // zinc finger protein of the cerebellum 2 // 14 E5 14 62.0 cM  | 0,018075  | -1,27569 |
| Syngap1       | ENSMUST000000081285 // Syngap1 // synaptic Ras GTPase activating protein 1 homolo | 0,0180856 | -1,33734 |
| Slc4a4        | NM_018760 // Slc4a4 // solute carrier family 4 (anion exchanger), member 4 // 5   | 0,0180878 | -1,4406  |
| Slc35a4       | NM_026404 // Slc35a4 // solute carrier family 35, member A4 // 18 B3 // 67843 //  | 0,0181006 | -1,26234 |
| Rasgrf2       | NM_009027 // Rasgrf2 // RAS protein-specific guanine nucleotide-releasing factor  | 0,0181219 | -1,21274 |
| P2ry13        | NM_028808 // P2ry13 // purinergic receptor P2Y, G-protein coupled 13 // 3 D // 7  | 0,0181962 | -1,20061 |
| Plce1         | NM_019588 // Plce1 // phospholipase C, epsilon 1 // 19 D1 // 74055 /// ENSMUST00  | 0,0182009 | -1,38323 |
| Mif4gd        | NR_029442 // Mif4gd // MIF4G domain containing // 11 E2 // 69674 /// NM_027162 /  | 0,0182056 | -1,24143 |
| Ipo4          | NM_024267 // Ipo4 // importin 4 // 14 C3 14 20.0 cM // 75751 /// ENSMUST000000047 | 0,0182558 | -1,23663 |
| Ccnj1         | NM_001045530 // Ccnj1 // cyclin J-like // 11 B1.1 // 380694 /// ENSMUST000000505  | 0,0182584 | -1,20435 |
| Scyl3         | NM_028776 // Scyl3 // SCY1-like 3 (S. cerevisiae) // 1 H2.2 // 240880 /// ENSMUS  | 0,0182606 | -1,24733 |
| Ptbp1         | NM_001077363 // Ptbp1 // polypyrimidine tract binding protein 1 // 10 C1 10 43.0  | 0,018275  | -1,20671 |
| Dlg4          | NM_007864 // Dlg4 // discs, large homolog 4 (Drosophila) // 11 B4 // 13385 /// N  | 0,018294  | -1,24212 |
| Gbf1          | NM_178930 // Gbf1 // golgi-specific brefeldin A-resistance factor 1 // 19 C3 //   | 0,0182943 | -1,25946 |
| Caskin1       | NM_027937 // Caskin1 // CASK interacting protein 1 // 17 A3.3 // 268932 /// ENSM  | 0,0182943 | -1,24613 |
| Pcdhb17       | NM_053142 // Pcdhb17 // protocadherin beta 17 // 18 B3 // 93888 /// ENSMUST00000  | 0,0183251 | -1,27722 |

|               |                                                                                   |           |          |
|---------------|-----------------------------------------------------------------------------------|-----------|----------|
| Lrrc58        | NM_177093 // Lrrc58 // leucine rich repeat containing 58 // 16 B3 // 320184 ///   | 0,0183309 | -1,23492 |
| Phf1          | NM_009343 // Phf1 // PHD finger protein 1 // 17 A3.3 17 15.15 cM // 21652 // EN   | 0,0183343 | -1,24686 |
| Adra2a        | NM_007417 // Adra2a // adrenergic receptor, alpha 2a // 19 D2 19 50.0 cM // 1155  | 0,0183377 | -1,25228 |
| Spep          | NM_007463 // Spep // SPEG complex locus // 1 C4 1 41.0 cM // 11790 // NM_001085   | 0,0183537 | -1,24023 |
| Skiv2l        | NM_021337 // Skiv2l // superkiller viralicidic activity 2-like (S. cerevisiae) /  | 0,0184002 | -1,27491 |
| Bend4         | NM_001164806 // Bend4 // BEN domain containing 4 // 5 C3.1 5 // 666938            | 0,0184231 | -1,20438 |
| Trp53bp2      | NM_173378 // Trp53bp2 // transformation related protein 53 binding protein 2 //   | 0,0184725 | -1,21885 |
| Gpc6          | NM_001079844 // Gpc6 // glypican 6 // 14 E4 // 23888 // NM_011821 // Gpc6 // gl   | 0,0184867 | -1,22473 |
| Lyn           | NM_001111096 // Lyn // Yamaguchi sarcoma viral (v-yes-1) oncogene homolog // 4 A  | 0,0185024 | -1,30778 |
| Zfp592        | NM_178707 // Zfp592 // zinc finger protein 592 // 7 D3 // 233410 // ENSMUST0000   | 0,0185178 | -1,30891 |
| Tcf12         | NM_011544 // Tcf12 // transcription factor 12 // 9 D 9 42.0 cM // 21406 // ENSM   | 0,0185421 | -1,21536 |
| Dnmt3a        | NM_007872 // Dnmt3a // DNA methyltransferase 3A // 12 A2-A3 // 13435 // NM_1537   | 0,0185701 | -1,23071 |
| Plcd3         | NM_152813 // Plcd3 // phospholipase C, delta 3 // 11 E1 11 63.0 cM // 72469 //    | 0,0185829 | -1,25001 |
| Cryz          | NM_009968 // Cryz // crystallin, zeta // 3 H4 // 12972 // ENSMUST00000029850 //   | 0,0186078 | -1,20681 |
| Map3k11       | NM_022012 // Map3k11 // mitogen-activated protein kinase kinase kinase 11 // 19   | 0,0186165 | -1,2438  |
| Mrrf          | NM_026422 // Mrrf // mitochondrial ribosome recycling factor // 2 B // 67871 //   | 0,0186178 | -1,25787 |
| Megf9         | NM_172694 // Megf9 // multiple EGF-like-domains 9 // 4 C2 // 230316 // ENSMUST0   | 0,0186224 | -1,21131 |
| Fbrs1         | NM_001142642 // Fbrs1 // fibrosin-like 1 // 5 F // 381668 // NM_028596 // Fbrs    | 0,0186375 | -1,30897 |
| Abhd4         | NM_134076 // Abhd4 // abhydrolase domain containing 4 // 14 C2 // 105501 // ENS   | 0,0187683 | -1,20564 |
| Srgap1        | NM_001081037 // Srgap1 // SLIT-ROBO Rho GTPase activating protein 1 // 10 D3 //   | 0,0187718 | -1,2968  |
| Fam20c        | NM_030565 // Fam20c // family with sequence similarity 20, member C // 5 G2 // 8  | 0,0187897 | -1,40381 |
| Ldlrad3       | NM_178886 // Ldlrad3 // low density lipoprotein receptor class A domain containi  | 0,0188559 | -1,20365 |
| P2rx7         | NM_011027 // P2rx7 // purinergic receptor P2X, ligand-gated ion channel, 7 // --  | 0,0188586 | -1,22911 |
| Jarid2        | NM_021878 // Jarid2 // jumonji, AT rich interactive domain 2 // 13 A5 13 27.0 cM  | 0,0188906 | -1,23006 |
| Zfyve1        | NM_183154 // Zfyve1 // zinc finger, FYVE domain containing 1 // 12 D1 // 217695   | 0,0188988 | -1,20384 |
| Apba1         | NM_177034 // Apba1 // amyloid beta (A4) precursor protein binding, family A, mem  | 0,0188997 | -1,2391  |
| Foxk1         | NM_199068 // Foxk1 // forkhead box K1 // 5 G2 5 82.0 cM // 17425 // ENSMUST0000   | 0,0189397 | -1,23774 |
| Camta2        | NM_178116 // Camta2 // calmodulin binding transcription activator 2 // 11 B3 11   | 0,0189426 | -1,30242 |
| Sh2b1         | NM_011363 // Sh2b1 // SH2B adaptor protein 1 // 7 F3 7 61.0 cM // 20399 // NM_0   | 0,0190172 | -1,25176 |
| Ubr4          | NM_001160319 // Ubr4 // ubiquitin protein ligase E3 component n-recognin 4 // 4   | 0,0190548 | -1,28828 |
| Gramd1b       | NM_172768 // Gramd1b // GRAM domain containing 1B // 9 B // 235283 // ENSMUST00   | 0,0190608 | -1,2573  |
| Zmiz2         | NM_028601 // Zmiz2 // zinc finger, MIZ-type containing 2 // 11 A1 11 25.0 cM //   | 0,0191061 | -1,30251 |
| Cspp1         | NM_026493 // Cspp1 // centrosome and spindle pole associated protein 1 // 1 A2 /  | 0,0191086 | -1,22301 |
| Slc12a4       | NM_009195 // Slc12a4 // solute carrier family 12, member 4 // 8 D3 8 53.0 cM //   | 0,0191154 | -1,20226 |
| Ctbp1         | NM_013502 // Ctbp1 // C-terminal binding protein 1 // 5 B1 5 19.0 cM // 13016 //  | 0,0191625 | -1,22597 |
| Sox10         | NM_011437 // Sox10 // SRY-box containing gene 10 // 15 E1 15 46.6 cM // 20665 //  | 0,0191692 | -1,23814 |
| Nploc4        | NM_199469 // Nploc4 // nuclear protein localization 4 homolog (S. cerevisiae) //  | 0,019178  | -1,25385 |
| Dync1h1       | NM_030238 // Dync1h1 // dynein cytoplasmic 1 heavy chain 1 // 12 F1 12 55.0 cM /  | 0,0192058 | -1,24886 |
| 9430008C03Rik | AK079109 // 9430008C03Rik // RIKEN cDNA 9430008C03 gene // 2 H1 // 68108 // AK0   | 0,0192103 | -1,20893 |
| Dync2h1       | NM_029851 // Dync2h1 // dynein cytoplasmic 2 heavy chain 1 // 9 A1 9 1.0 cM // 1  | 0,0192736 | -1,20516 |
| Ski           | NM_011385 // Ski // ski sarcoma viral oncogene homolog (avian) // 4 E2 4 78.9 cM  | 0,0192741 | -1,32746 |
| Map3k10       | NM_001081292 // Map3k10 // mitogen-activated protein kinase kinase kinase 10 //   | 0,0192788 | -1,31751 |
| Capn2         | NM_009794 // Capn2 // calpain 2 // 1 H5 // 12334 // ENSMUST00000068505 // Capn2   | 0,0192796 | -1,21243 |
| Flot2         | NM_008028 // Flot2 // flotillin 2 // 11 B5 11 46.0 cM // 14252 // NM_001040403    | 0,0192923 | -1,2333  |
| Entpd1        | NM_009848 // Entpd1 // ectionucleoside triphosphate diphosphohydrolase 1 // 19 C3 | 0,0193108 | -1,22753 |

|               |                                                                                  |           |          |
|---------------|----------------------------------------------------------------------------------|-----------|----------|
| Gm4876        | ENSMUST00000067679 // Gm4876 // predicted gene 4876 // 6 A2 6 // 232599          | 0,0193142 | -1,24405 |
| Nfatc3        | NM_010901 // Nfatc3 // nuclear factor of activated T-cells, cytoplasmic, calcine | 0,0193288 | -1,27054 |
| Emr1          | NM_010130 // Emr1 // EGF-like module containing, mucin-like, hormone receptor-li | 0,0193344 | -1,2189  |
| Slimo1        | NM_144867 // Slimo1 // slowmo homolog 1 (Drosophila) // 18 E1 // 225655 // ENSMU | 0,0193395 | -1,32212 |
| Ssbp4         | NM_133772 // Ssbp4 // single stranded DNA binding protein 4 // --- // 76900 //   | 0,0193573 | -1,32    |
| Slc35f2       | NM_028060 // Slc35f2 // solute carrier family 35, member F2 // 9 A5.3 // 72022 / | 0,0193904 | -1,20487 |
| Dgcr2         | NM_010048 // Dgcr2 // DiGeorge syndrome critical region gene 2 // 16 A-B1 16 10. | 0,0193967 | -1,22839 |
| Gramd3        | NM_026240 // Gramd3 // GRAM domain containing 3 // 18 D2 // 107022 // ENSMUST00  | 0,0194259 | -1,21366 |
| Akap1         | NM_009648 // Akap1 // A kinase (PRKA) anchor protein 1 // 11 C // 11640 // NM_0  | 0,0194365 | -1,2321  |
| Ston2         | NM_175367 // Ston2 // stonin 2 // 12 D3 // 108800 // ENSMUST00000052969 // Ston  | 0,0194424 | -1,22223 |
| Gng7          | NM_001038655 // Gng7 // guanine nucleotide binding protein (G protein), gamma 7  | 0,0194592 | -1,27856 |
| Man2a2        | NM_172903 // Man2a2 // mannosidase 2, alpha 2 // 7 D2 // 140481 // ENSMUST000000 | 0,0194877 | -1,42522 |
| Agap1         | NM_178119 // Agap1 // ArfGAP with GTPase domain, ankyrin repeat and PH domain 1  | 0,0195026 | -1,31114 |
| Paps2         | NM_011864 // Paps2 // 3'-phosphoadenosine 5'-phosphosulfate synthase 2 // 19 C1  | 0,0195047 | -1,32706 |
| Chd7          | NM_001081417 // Chd7 // chromodomain helicase DNA binding protein 7 // 4 A1 4 1. | 0,0195248 | -1,2729  |
| Max           | NM_008558 // Max // Max protein // 12 D1-D3 12 32.0 cM // 17187 // NM_001146176  | 0,0195374 | -1,26103 |
| Mast2         | NM_001042743 // Mast2 // microtubule associated serine/threonine kinase 2 // 4 C | 0,0195531 | -1,26028 |
| Alg1          | NM_145362 // Alg1 // asparagine-linked glycosylation 1 homolog (yeast, beta-1,4- | 0,0195547 | -1,21485 |
| Clic4         | NM_013885 // Clic4 // chloride intracellular channel 4 (mitochondrial) // 4 D3 / | 0,0195778 | -1,26066 |
| Cytsa         | NM_153406 // Cytsa // cytosin A // 10 C1 // 74392 // NM_001145826 // Cytsa //    | 0,0196075 | -1,20524 |
| Arhgef11      | NM_001003912 // Arhgef11 // Rho guanine nucleotide exchange factor (GEF) 11 // 3 | 0,0196132 | -1,23134 |
| Tln1          | NM_011602 // Tln1 // talin 1 // 4 B1 // 21894 // ENSMUST00000030187 // Tln1 //   | 0,0196449 | -1,20424 |
| AI854703      | NR_027236 // AI854703 // expressed sequence AI854703 // 6 B2.3 // 243373 // ENS  | 0,0196824 | -1,20155 |
| Plekhh2       | NM_177606 // Plekhh2 // pleckstrin homology domain containing, family H (with My | 0,019684  | -1,28946 |
| Mecp2         | NM_010788 // Mecp2 // methyl CpG binding protein 2 // X A7.3 X 29.6 cM // 17257  | 0,0196856 | -1,26898 |
| Arnt          | NM_001037737 // Arnt // aryl hydrocarbon receptor nuclear translocator // 3 F2.1 | 0,0196901 | -1,21893 |
| Usp31         | NM_001033173 // Usp31 // ubiquitin specific peptidase 31 // 7 F2 // 76179        | 0,0196983 | -1,28474 |
| Rbm7          | NM_144948 // Rbm7 // RNA binding motif protein 7 // 9 A5.3 // 67010 // ENSMUST0  | 0,0197075 | -1,24023 |
| Zc3h12c       | NM_001162921 // Zc3h12c // zinc finger CCH type containing 12C // 9 A5.3 // 244  | 0,0197297 | -1,22698 |
| Dact1         | NM_021532 // Dact1 // dapper homolog 1, antagonist of beta-catenin (xenopus) //  | 0,0197324 | -1,23458 |
| Snora73b      | NR_028513 // Snora73b // small nucleolar RNA, H/ACA box 73b // 4 D2.3 // 1003069 | 0,0197383 | -1,32092 |
| Bcl9l         | NM_030256 // Bcl9l // B-cell CLL/lymphoma 9-like // 9 B // 80288 // ENSMUST0000  | 0,0197711 | -1,32487 |
| Eid2b         | NM_001177427 // Eid2b // EP300 interacting inhibitor of differentiation 2B // 7  | 0,0197876 | -1,2292  |
| Lrp8          | NR_033496 // Lrp8 // low density lipoprotein receptor-related protein 8, apolipo | 0,0197994 | -1,29504 |
| Fasn          | NM_007988 // Fasn // fatty acid synthase // 11 E2 11 72.0 cM // 14104 // ENSMUS  | 0,0198134 | -1,33101 |
| Trdn          | NM_029726 // Trdn // triadin // 10 A4 // 76757                                   | 0,0198605 | -1,49427 |
| Smad3         | NM_016769 // Smad3 // MAD homolog 3 (Drosophila) // --- // 17127 // ENSMUST0000  | 0,0198741 | -1,23466 |
| Dhtkd1        | NM_001081131 // Dhtkd1 // dehydrogenase E1 and transketolase domain containing 1 | 0,0198759 | -1,2317  |
| Lbh           | NM_029999 // Lbh // limb-bud and heart // --- // 77889 // BC052470 // Lbh // li  | 0,0198962 | -1,21619 |
| Atrn          | NM_009730 // Atrn // attractin // 2 F1 2 73.9 cM // 11990 // ENSMUST00000028781  | 0,0199478 | -1,24853 |
| 2510039O18Rik | NM_029841 // 2510039O18Rik // RIKEN cDNA 2510039O18 gene // 4 E1 // 77034 // EN  | 0,0199916 | -1,22475 |
| Ulk2          | NM_013881 // Ulk2 // Unc-51 like kinase 2 (C. elegans) // 11 B2 // 29869 // ENS  | 0,0200149 | -1,22036 |
| Mtap7d1       | NM_144941 // Mtap7d1 // microtubule-associated protein 7 domain containing 1 //  | 0,0200214 | -1,29175 |
| Pcyox1l       | NM_172832 // Pcyox1l // prenylcysteine oxidase 1 like // 18 E1 // 240334 // ENS  | 0,020027  | -1,23673 |
| Akap10        | NM_019921 // Akap10 // A kinase (PRKA) anchor protein 10 // 11 B2 // 56697 // E  | 0,0200347 | -1,22838 |

|               |                                                                                   |           |          |
|---------------|-----------------------------------------------------------------------------------|-----------|----------|
| Tac2          | NM_009312 // Tac2 // tachykinin 2 // 10 D3 // 21334 // ENSMUST0000026466 // Ta    | 0,0200782 | -1,23448 |
| Adam11        | NM_001110778 // Adam11 // a disintegrin and metallopeptidase domain 11 // 11 E1   | 0,020115  | -1,2016  |
| Hira          | NM_010435 // Hira // histone cell cycle regulation defective homolog A (S. cerev  | 0,0201354 | -1,2322  |
| Cadps         | NM_012061 // Cadps // Ca2+-dependent secretion activator // 14 A2 // 27062 // N   | 0,0201583 | -1,21541 |
| Cep350        | NM_001039184 // Cep350 // centrosomal protein 350 // 1 G3 // 74081                | 0,0201627 | -1,24483 |
| Pnrc2         | NM_026383 // Pnrc2 // proline-rich nuclear receptor coactivator 2 // 4 D3J4 66.7  | 0,0201808 | -1,22883 |
| Cux1          | NM_009986 // Cux1 // cut-like homeobox 1 // 5 G2J5 78.0 cM // 13047 // NM_19860   | 0,0201907 | -1,22393 |
| Foxf2         | NM_010225 // Foxf2 // forkhead box F2 // 13 A4 // 14238 // ENSMUST0000042054 //   | 0,0202093 | -1,2139  |
| Sun1          | NM_024451 // Sun1 // Sad1 and UNC84 domain containing 1 // 5 G1 // 77053 // ENS   | 0,0202523 | -1,20384 |
| Nova2         | NM_001029877 // Nova2 // neuro-oncological ventral antigen 2 // 7 A3 // 384569 // | 0,0202657 | -1,2173  |
| 1200009O22Rik | NM_025817 // 1200009O22Rik // RIKEN cDNA 1200009O22 gene // 6 B3 // 66873 // BC   | 0,0202892 | -1,29841 |
| Rassf2        | NM_175445 // Rassf2 // Ras association (RalGDS/AF-6) domain family member 2 // 2  | 0,0202956 | -1,22305 |
| Paqr4         | NM_023824 // Paqr4 // progesterin and adipoQ receptor family member IV // 17 A3.3 | 0,0203287 | -1,23896 |
| Atxn1         | NM_001080930 // Atxn1 // ataxin 1-like // 8 D3J8 53.0 cM // 52335 // ENSMUST00    | 0,0203818 | -1,28262 |
| 6430526N21Rik | NM_001033383 // 6430526N21Rik // RIKEN cDNA 6430526N21 gene // 7 A1 // 319748 //  | 0,0204376 | -1,29107 |
| Map6d1        | NM_198599 // Map6d1 // MAP6 domain containing 1 // 16 A3 // 208158 // ENSMUST00   | 0,020481  | -1,23679 |
| Slc19a3       | NM_030556 // Slc19a3 // solute carrier family 19 (sodium/hydrogen exchanger), me  | 0,0204898 | -1,2533  |
| Tmem132b      | ENSMUST00000031446 // Tmem132b // transmembrane protein 132B // 5 G1.1 // 208151  | 0,0204943 | -1,20931 |
| Nrxn3         | NM_172544 // Nrxn3 // neuroligin III // 12D2J12 45.0 cM // 18191 // ENSMUST000000 | 0,0205132 | -1,21468 |
| Robo1         | NM_019413 // Robo1 // roundabout homolog 1 (Drosophila) // 16 C3.1 // 19876 //    | 0,0205578 | -1,25456 |
| Gab2          | NM_010248 // Gab2 // growth factor receptor bound protein 2-associated protein 2  | 0,0205725 | -1,28459 |
| Dazap2        | NM_011873 // Dazap2 // DAZ associated protein 2 // 15 F1J15 60.0 cM // 23994 //   | 0,0205811 | -1,2174  |
| Unc13a        | NM_001029873 // Unc13a // unc-13 homolog A (C. elegans) // 8 B3.3 // 382018 //    | 0,0205815 | -1,22607 |
| Amigo1        | NM_146137 // Amigo1 // adhesion molecule with Ig like domain 1 // 3 F2.3 // 2297  | 0,0205903 | -1,25188 |
| Msn           | NM_010833 // Msn // moesin // X C3 // 17698 // ENSMUST00000117399 // Msn // moe   | 0,0205916 | -1,21008 |
| 9430020K01Rik | NM_001081963 // 9430020K01Rik // RIKEN cDNA 9430020K01 gene // 18 A1 // 240185 // | 0,0206559 | -1,31418 |
| Chd7          | NM_001081417 // Chd7 // chromodomain helicase DNA binding protein 7 // 4 A1J4 1.  | 0,0206755 | -1,2692  |
| Dip2b         | NM_001159361 // Dip2b // DIP2 disco-interacting protein 2 homolog B (Drosophila)  | 0,0206994 | -1,2012  |
| Ppard         | NM_011145 // Ppard // peroxisome proliferator activator receptor delta // 17 A3.  | 0,0207568 | -1,29848 |
| Heg1          | NM_175256 // Heg1 // HEG homolog 1 (zebrafish) // 16 B3 // 77446 // ENSMUST0000   | 0,0207842 | -1,25115 |
| Plekhm1       | NM_183034 // Plekhm1 // pleckstrin homology domain containing, family M (with RU  | 0,0207846 | -1,27966 |
| Zfp275        | NM_031494 // Zfp275 // zinc finger protein 275 // X A7.3JX 29.21 cM // 27081 //   | 0,0207861 | -1,20497 |
| Atg9a         | NM_001003917 // Atg9a // autophagy-related 9A (yeast) // 1 C3 // 245860 // ENSM   | 0,0208087 | -1,2127  |
| Tecpr2        | NM_001081057 // Tecpr2 // tectonin beta-propeller repeat containing 2 // 12 F1 // | 0,0208265 | -1,31461 |
| Imp4          | NM_178601 // Imp4 // IMP4, U3 small nucleolar ribonucleoprotein, homolog (yeast)  | 0,0208346 | -1,24143 |
| Atad2b        | NM_001099628 // Atad2b // ATPase family, AAA domain containing 2B // 12 A1.1 //   | 0,0209097 | -1,2204  |
| Tmem214       | NM_144525 // Tmem214 // transmembrane protein 214 // 5 B1 // 68796 // ENSMUST00   | 0,0209111 | -1,21376 |
| Tnik          | NM_026910 // Tnik // TRAF2 and NCK interacting kinase // 3 A3 // 665113 // NM_0   | 0,0209199 | -1,20514 |
| Dock7         | NM_026082 // Dock7 // dedicator of cytokinesis 7 // 4 C6 // 67299 // ENSMUST000   | 0,0209508 | -1,2014  |
| Fbxo41        | NM_001001160 // Fbxo41 // F-box protein 41 // 6 C3J6 35.5 cM // 330369 // ENSMU   | 0,020966  | -1,25098 |
| Phf21a        | NM_001109691 // Phf21a // PHD finger protein 21A // 2 E1 // 192285 // NM_138755   | 0,021007  | -1,21604 |
| Ppfia3        | NM_029741 // Ppfia3 // protein tyrosine phosphatase, receptor type, f polypeptid  | 0,0210075 | -1,23083 |
| Abhd3         | NM_134130 // Abhd3 // abhydrolase domain containing 3 // 18 A1 // 106861 // ENS   | 0,0210426 | -1,20677 |
| Tmem223       | NM_025791 // Tmem223 // transmembrane protein 223 // 19 A // 66836 // ENSMUST00   | 0,021074  | -1,24972 |
| Arhgap23      | NM_021493 // Arhgap23 // Rho GTPase activating protein 23 // 11 D // 58996 // E   | 0,0210869 | -1,22259 |

|         |                                                                                  |           |          |
|---------|----------------------------------------------------------------------------------|-----------|----------|
| Taz     | NM_001173547 // Taz // tafazzin // X C1-C3 // 66826 /// NM_181516 // Taz // tafa | 0,0210955 | -1,2256  |
| Phkb    | NM_199446 // Phkb // phosphorylase kinase beta // 8 C3 8 38.6 cM // 102093 /// E | 0,0211396 | -1,20198 |
| Fermt2  | NM_146054 // Fermt2 // fermitin family homolog 2 (Drosophila) // 14 C1 // 218952 | 0,0211401 | -1,20916 |
| Hmgcs2  | NM_008256 // Hmgcs2 // 3-hydroxy-3-methylglutaryl-Coenzyme A synthase 2 // 3 F2. | 0,0211438 | -1,27913 |
| Slc38a3 | NM_023805 // Slc38a3 // solute carrier family 38, member 3 // 9 F1 9 63.0 cM //  | 0,0211543 | -1,30686 |
| Lrrn1   | NM_008516 // Lrrn1 // leucine rich repeat protein 1, neuronal // 6 E1 // 16979 / | 0,0211694 | -1,29592 |
| Eefsec  | NM_023060 // Eefsec // eukaryotic elongation factor, selenocysteine-tRNA-specifi | 0,0212024 | -1,22651 |
| Sec22c  | NM_178677 // Sec22c // SEC22 vesicle trafficking protein homolog C (S. cerevisia | 0,0212333 | -1,30185 |
| Slc6a13 | NM_144512 // Slc6a13 // solute carrier family 6 (neurotransmitter transporter, G | 0,0212494 | -1,41109 |
| Aph1a   | NM_146104 // Aph1a // anterior pharynx defective 1a homolog (C. elegans) // 3 F2 | 0,0212626 | -1,2749  |
| Slc46a1 | NM_026740 // Slc46a1 // solute carrier family 46, member 1 // 11 B5 11 45.0 cM / | 0,0213137 | -1,2037  |
| Ube2l3  | NM_009456 // Ube2l3 // ubiquitin-conjugating enzyme E2L 3 // 16 A3 16 10.2 cM // | 0,0213178 | -1,20483 |
| Dock6   | NM_177030 // Dock6 // dedicator of cytokinesis 6 // 9 A3 // 319899 /// ENSMUST00 | 0,021328  | -1,22181 |
| Szt2    | NM_198170 // Szt2 // seizure threshold 2 // 4 D2.1 // 230676 /// ENSMUST00000075 | 0,0213628 | -1,20615 |
| Asb1    | NM_001039126 // Asb1 // ankyrin repeat and SOCS box-containing 1 // 1 D 1 57.0 c | 0,0214293 | -1,20949 |
| Tbx3    | NM_011535 // Tbx3 // T-box 3 // 5 F 5 65.0 cM // 21386 /// NM_198052 // Tbx3 //  | 0,0214736 | -1,20865 |
| Setd1b  | BC038367 // Setd1b // SET domain containing 1B // 5 F // 208043                  | 0,021515  | -1,44379 |
| Zc3h12b | NM_001034907 // Zc3h12b // zinc finger CCCH-type containing 12B // X C3 // 54717 | 0,021517  | -1,20529 |
| Usp30   | NM_001033202 // Usp30 // ubiquitin specific peptidase 30 // 5 F 5 61.0 cM // 100 | 0,0215463 | -1,21198 |
| Idua    | NM_008325 // Idua // iduronidase, alpha-L- // 5 E5 5 57.0 cM // 15932 /// ENSMUS | 0,021571  | -1,37656 |
| Caskin2 | NM_080643 // Caskin2 // CASK-interacting protein 2 // 11 E2 // 140721 /// ENSMUS | 0,0215901 | -1,20005 |
| Zfc3h1  | NM_001033261 // Zfc3h1 // zinc finger, C3H1-type containing // 10 D2 // 216345 / | 0,0215983 | -1,20937 |
| Mfsd10  | NM_026660 // Mfsd10 // major facilitator superfamily domain containing 10 // 5 B | 0,0216072 | -1,21476 |
| Unc80   | NM_175510 // Unc80 // unc-80 homolog (C. elegans) // 1 C3 // 329178 /// ENSMUSTO | 0,0216081 | -1,40246 |
| Foxj2   | NM_021899 // Foxj2 // forkhead box J2 // 6 F2 // 60611 /// ENSMUST00000003238 // | 0,0217175 | -1,28993 |
| Lass4   | NM_026058 // Lass4 // LAG1 homolog, ceramide synthase 4 // 8 A1.2 // 67260 /// E | 0,0217351 | -1,22218 |
| Egln1   | NM_053207 // Egln1 // EGL nine homolog 1 (C. elegans) // 8 E2 // 112405 /// ENSM | 0,0217893 | -1,25455 |
| Hivep3  | NM_010657 // Hivep3 // human immunodeficiency virus type I enhancer binding prot | 0,0218169 | -1,24285 |
| Dgki    | NM_001081206 // Dgki // diacylglycerol kinase, iota // 6 B1 // 320127 /// ENSMUS | 0,0218385 | -1,20236 |
| Igf2r   | NM_010515 // Igf2r // insulin-like growth factor 2 receptor // 17 A-C 17 7.35 cM | 0,0218771 | -1,22103 |
| Tmem28  | NM_001081283 // Tmem28 // transmembrane protein 28 // X C3 // 620592 /// ENSMUST | 0,021907  | -1,39344 |
| Tox3    | NM_172913 // Tox3 // TOX high mobility group box family member 3 // 8 C4 8 40.0  | 0,0219825 | -1,27519 |
| Arfgef2 | NM_001085495 // Arfgef2 // ADP-ribosylation factor guanine nucleotide-exchange f | 0,0220112 | -1,26445 |
| Arhgap6 | NM_009707 // Arhgap6 // Rho GTPase activating protein 6 // X F5 // 11856 /// NM_ | 0,0220126 | -1,2982  |
| Csmd3   | NM_001081391 // Csmd3 // CUB and Sushi multiple domains 3 // 15 D1 // 239420 /// | 0,0220416 | -1,29265 |
| Cad     | NM_023525 // Cad // carbamoyl-phosphate synthetase 2, aspartate transcarbamylase | 0,0220454 | -1,23108 |
| Lmf2    | NM_178919 // Lmf2 // lipase maturation factor 2 // 15 E3 // 105847 /// ENSMUST00 | 0,0220552 | -1,27002 |
| Dlc1    | NM_015802 // Dlc1 // deleted in liver cancer 1 // 8 A4-B2 8 21.0 cM // 50768 /// | 0,0220797 | -1,20932 |
| Lhx2    | NM_010710 // Lhx2 // LIM homeobox protein 2 // 2 B // 16870 /// ENSMUST000000002 | 0,0220856 | -1,23458 |
| Uxs1    | NM_026430 // Uxs1 // UDP-glucuronate decarboxylase 1 // 1 C1.1 // 67883 /// ENSM | 0,0221084 | -1,21204 |
| Sytl2   | NM_001040085 // Sytl2 // synaptotagmin-like 2 // 7 E1 // 83671 /// NM_031394 //  | 0,0221122 | -1,24147 |
| Unc13c  | NM_001081153 // Unc13c // unc-13 homolog C (C. elegans) // 9 D // 208898 /// ENS | 0,0221153 | -1,28988 |
| 04-mars | NM_001045533 // March4 // membrane-associated ring finger (C3HC4) 4 // 1 C3 // 3 | 0,0221327 | -1,32409 |
| Dok4    | NM_053246 // Dok4 // docking protein 4 // 8 D1 // 114255 /// NM_009090 // Polr2c | 0,0221384 | -1,22352 |
| Foxn3   | NM_183186 // Foxn3 // forkhead box N3 // 12 E // 71375 /// ENSMUST00000046859 // | 0,0221389 | -1,20761 |



|               |                                                                                   |           |          |
|---------------|-----------------------------------------------------------------------------------|-----------|----------|
| Ank1          | NM_001110783 // Ank1 // ankyrin 1, erythroid // 8 A2 8 9.5 cM // 11733 /// NM_03  | 0,0221507 | -1,34033 |
| Zfp536        | NM_172385 // Zfp536 // zinc finger protein 536 // 7 B2 // 243937 /// ENSMUST0000  | 0,0221642 | -1,22337 |
| 4933407C03Rik | NM_028941 // 4933407C03Rik // RIKEN cDNA 4933407C03 gene // 8 E1 // 74440 /// NM  | 0,022176  | -1,20853 |
| Pum1          | NM_030722 // Pum1 // pumilio 1 (Drosophila) // 4 D2.2-D2.3 // 80912 /// NM_00115  | 0,0221766 | -1,21603 |
| Pcdh20        | NM_178685 // Pcdh20 // protocadherin 20 // 14 E1 // 219257 /// ENSMUST0000006162  | 0,0222197 | -1,29731 |
| Gm9938        | ENSMUST00000067077 // Gm9938 // predicted gene 9938 // --- // 791290              | 0,0222258 | -1,29066 |
| Ncor1         | NM_011308 // Ncor1 // nuclear receptor co-repressor 1 // 11 B2 // 20185 /// ENSM  | 0,0222269 | -1,25316 |
| 4732418C07Rik | BC059213 // 4732418C07Rik // RIKEN cDNA 4732418C07 gene // 4 D1 // 230648 /// EN  | 0,0222468 | -1,29457 |
| Bcl7b         | NM_009745 // Bcl7b // B-cell CLL/lymphoma 7B // 5 G2 // 12054 /// ENSMUST00000003 | 0,022258  | -1,2     |
| Ttk1          | NM_001162864 // Ttk1 // tau tubulin kinase 1 // 17 C // 106763 /// ENSMUST00000   | 0,0224373 | -1,2626  |
| Sntb1         | NM_016667 // Sntb1 // syntrophin, basic 1 // 15 D1 15 33.2 cM // 20649 /// ENSMU  | 0,0224812 | -1,40042 |
| Med13         | NM_001080931 // Med13 // mediator complex subunit 13 // 11 C // 327987 /// ENSMU  | 0,0224896 | -1,2558  |
| C330007P06Rik | NM_029951 // C330007P06Rik // RIKEN cDNA C330007P06 gene // X A3.3 // 77644 ///   | 0,0224939 | -1,20077 |
| Tie1          | NM_011599 // Tie1 // transducin-like enhancer of split 1, homolog of Drosophila   | 0,0224955 | -1,20732 |
| Sf1           | NM_001110791 // Sf1 // splicing factor 1 // 19 B // 22668 /// NM_011750 // Sf1 /  | 0,0224956 | -1,23246 |
| Nfkbib        | NM_010908 // Nfkbib // nuclear factor of kappa light polypeptide gene enhancer i  | 0,0225154 | -1,25158 |
| Pde4b         | NM_019840 // Pde4b // phosphodiesterase 4B, cAMP specific // 4 C6 4 46.8 cM // 1  | 0,0225172 | -1,20141 |
| Tnfsf18       | NM_183391 // Tnfsf18 // tumor necrosis factor (ligand) superfamily, member 18 //  | 0,0225382 | -1,21759 |
| Sap130        | NM_172965 // Sap130 // Sin3A associated protein // 18 B2 // 269003 /// ENSMUST00  | 0,0225583 | -1,24481 |
| Sec31a        | NM_026969 // Sec31a // Sec31 homolog A (S. cerevisiae) // 5 E3 // 69162 /// ENSM  | 0,0225905 | -1,22718 |
| Ptpn13        | NM_011204 // Ptpn13 // protein tyrosine phosphatase, non-receptor type 13 // 5 E  | 0,0225954 | -1,20374 |
| Dym           | NM_027727 // Dym // dymeclin // 18 E2 // 69190 /// ENSMUST00000039608 // Dym //   | 0,0226259 | -1,20621 |
| Rhbd1         | NM_144816 // Rhbd1 // rhomboid, veinlet-like 1 (Drosophila) // 17 A3.3 17 11.6    | 0,0226319 | -1,2061  |
| Klh29         | NM_001164493 // Klh29 // kelch-like 29 (Drosophila) // 12 A.1 // 208439 /// EN    | 0,0226572 | -1,23255 |
| Nicn1         | NM_025449 // Nicn1 // nicolin 1 // 9 F2 // 66257 /// ENSMUST00000035227 // Nicn1  | 0,0226775 | -1,21652 |
| A1464131      | BC137640 // A1464131 // expressed sequence A1464131 // 4 A5 // 329828 /// NM_001  | 0,0226841 | -1,35127 |
| Zfp384        | NM_175557 // Zfp384 // zinc finger protein 384 // 6 F2 // 269800 /// ENSMUST0000  | 0,0226868 | -1,23475 |
| Ncam1         | NM_001081445 // Ncam1 // neural cell adhesion molecule 1 // 9 A5.3 9 28.0 cM //   | 0,0226934 | -1,24011 |
| Vegfb         | NM_011697 // Vegfb // vascular endothelial growth factor B // 19 B // 22340 ///   | 0,0227455 | -1,21991 |
| 2310040G07Rik | ENSMUST00000101090 // 2310040G07Rik // RIKEN cDNA 2310040G07 gene // --- // 7028  | 0,0227668 | -1,25363 |
| Pou2f1        | NM_011137 // Pou2f1 // POU domain, class 2, transcription factor 1 // 1 H2.3 1 8  | 0,02278   | -1,21489 |
| Atf7ip        | NM_019426 // Atf7ip // activating transcription factor 7 interacting protein //   | 0,0228072 | -1,2112  |
| Ncoa6         | NM_019825 // Ncoa6 // nuclear receptor coactivator 6 // --- // 56406 /// ENSMUST  | 0,0228409 | -1,21885 |
| Nomo1         | NM_153057 // Nomo1 // nodal modulator 1 // 7 B4 7 23.2 cM // 211548 /// ENSMUST0  | 0,0228415 | -1,29723 |
| Unc79         | NM_001081017 // Unc79 // unc-79 homolog (C. elegans) // 12 E // 217843 /// ENSMU  | 0,0229022 | -1,20134 |
| Tnk2          | NM_016788 // Tnk2 // tyrosine kinase, non-receptor, 2 // 16 B3 // 51789 /// NM_0  | 0,0229025 | -1,27462 |
| Nlk           | NM_008702 // Nlk // nemo like kinase // 11 B5 // 18099 /// BC058652 // Nlk // ne  | 0,0229456 | -1,215   |
| Sf3b4         | NM_153053 // Sf3b4 // splicing factor 3b, subunit 4 // 3 F2.1 // 107701 /// ENSM  | 0,0229486 | -1,2012  |
| Gtf3c2        | NM_027901 // Gtf3c2 // general transcription factor IIIC, polypeptide 2, beta //  | 0,0229613 | -1,257   |
| Ptprz1        | NM_001081306 // Ptprz1 // protein tyrosine phosphatase, receptor type Z, polypep  | 0,0230071 | -1,39489 |
| Rlbp1         | NM_020599 // Rlbp1 // retinaldehyde binding protein 1 // 7 D3 7 39.0 cM // 19771  | 0,0230084 | -1,28055 |
| Nfe2l2        | NM_010902 // Nfe2l2 // nuclear factor, erythroid derived 2, like 2 // 2 C3 2 45.  | 0,0230207 | -1,22467 |
| Filip1        | NM_001081243 // Filip1 // filamin A interacting protein 1 // 9 E2 // 70598 /// E  | 0,0230627 | -1,20977 |
| Mllt10        | NM_010804 // Mllt10 // myeloid/lymphoid or mixed-lineage leukemia (trithorax hom  | 0,023087  | -1,21664 |
| Cdk5r2        | NM_009872 // Cdk5r2 // cyclin-dependent kinase 5, regulatory subunit 2 (p39) //   | 0,023112  | -1,22152 |

|               |                                                                                   |           |          |
|---------------|-----------------------------------------------------------------------------------|-----------|----------|
| Slitrk2       | NM_198863 // Slitrk2 // SLIT and NTRK-like family, member 2 // X A5 // 245450 //  | 0,0231121 | -1,24383 |
| Vat1          | NM_012037 // Vat1 // vesicle amine transport protein 1 homolog (T californica) /  | 0,0231217 | -1,29731 |
| Ints3         | NM_145540 // Ints3 // integrator complex subunit 3 // 3 F1 // 229543 /// NM_1788  | 0,0231386 | -1,29968 |
| Ube4a         | NM_145400 // Ube4a // ubiquitination factor E4A, UFD2 homolog (S. cerevisiae) //  | 0,0231479 | -1,24477 |
| Pomt2         | NM_153415 // Pomt2 // protein-O-mannosyltransferase 2 // 12 D2 // 217734 /// ENS  | 0,0231553 | -1,22421 |
| BC057022      | BC057022 // BC057022 // cDNA sequence BC057022 // 5 F // 433940 /// ENSMUST00000  | 0,0231626 | -1,20375 |
| Saps1         | NM_172894 // Saps1 // SAPS domain family, member 1 // 7 A1 // 243819 /// ENSMUST  | 0,0232678 | -1,24193 |
| Ptpm          | NM_008984 // Ptpm // protein tyrosine phosphatase, receptor type, M // 17 E1.1]   | 0,0233054 | -1,26372 |
| Tmem201       | NM_001025106 // Tmem201 // transmembrane protein 201 // 4 E2]4 76.4 cM // 230917  | 0,0233133 | -1,22218 |
| Slc13a3       | NM_054055 // Slc13a3 // solute carrier family 13 (sodium-dependent dicarboxylate  | 0,023318  | -1,38232 |
| Astn1         | NM_007495 // Astn1 // astrotactin 1 // 1 H1 // 11899 /// BC094666 // Astn1 // as  | 0,0233512 | -1,24465 |
| Cerk          | NM_145475 // Cerk // ceramide kinase // 15 E2 // 223753 /// ENSMUST00000044332 /  | 0,0234167 | -1,28243 |
| Cyfp2         | NM_133769 // Cyfp2 // cytoplasmic FMR1 interacting protein 2 // 11 B1.2 // 7688   | 0,0234214 | -1,22619 |
| Kcnd3         | NM_001039347 // Kcnd3 // potassium voltage-gated channel, Shal-related family, m  | 0,0234303 | -1,26451 |
| Alpl          | NM_007431 // Alpl // alkaline phosphatase, liver/bone/kidney // 4 D3]4 70.2 cM /  | 0,0234385 | -1,25967 |
| Wdfy3         | NM_172882 // Wdfy3 // WD repeat and FYVE domain containing 3 // 5 E4-E5]5 54.0 c  | 0,0234501 | -1,297   |
| Ube2q1        | NM_027315 // Ube2q1 // ubiquitin-conjugating enzyme E2Q (putative) 1 // 3 F2 //   | 0,0234529 | -1,21081 |
| Jag2          | NM_010588 // Jag2 // jagged 2 // 12 F1]12 57.9 cM // 16450 /// ENSMUST0000007582  | 0,0235038 | -1,21709 |
| Tmem184b      | NM_172608 // Tmem184b // transmembrane protein 184b // 15 E1 // 223693 /// ENSMU  | 0,0235056 | -1,23664 |
| Prmt5         | NM_013768 // Prmt5 // protein arginine N-methyltransferase 5 // --- // 27374 ///  | 0,0235219 | -1,25149 |
| Dcx           | NM_001110222 // Dcx // doublecortin // X F2 // 13193 /// NM_001110223 // Dcx //   | 0,0235287 | -1,41295 |
| Trrap         | NM_001081362 // Trrap // transformation/transcription domain-associated protein   | 0,0235296 | -1,29926 |
| 1300010F03Rik | NM_027906 // 1300010F03Rik // RIKEN cDNA 1300010F03 gene // 14 D3 // 2319189 ///  | 0,02353   | -1,22359 |
| Tmbim1        | NM_027154 // Tmbim1 // transmembrane BAX inhibitor motif containing 1 // 1 C3 //  | 0,0235393 | -1,20062 |
| Tmem132a      | NM_133804 // Tmem132a // transmembrane protein 132A // 19 A // 98170 /// ENSMUST  | 0,0235493 | -1,2629  |
| Ercc3         | NM_133658 // Ercc3 // excision repair cross-complementing rodent repair deficient | 0,0235672 | -1,21696 |
| Trim62        | NM_178110 // Trim62 // tripartite motif-containing 62 // 4 D2.2 // 67525 /// ENS  | 0,023635  | -1,21407 |
| Fhl1          | NM_001077361 // Fhl1 // four and a half LIM domains 1 // X A6-A7.1 // 14199 ///   | 0,0236498 | -1,20596 |
| Lrrc8a        | NM_177725 // Lrrc8a // leucine rich repeat containing 8A // 2 B // 241296 /// EN  | 0,0237219 | -1,24347 |
| Nynrin        | NM_001040072 // Nynrin // NYN domain and retroviral integrase containing // 14 C  | 0,0237317 | -1,26481 |
| Cul9          | NM_001081335 // Cul9 // cullin 9 // 17 C // 78309 /// ENSMUST00000066026 // Cul9  | 0,0237624 | -1,25725 |
| Sema3c        | NM_013657 // Sema3c // sema domain, immunoglobulin domain (Ig), short basic doma  | 0,0237662 | -1,35506 |
| Lrrk2         | NM_025730 // Lrrk2 // leucine-rich repeat kinase 2 // 15 F1 // 66725 /// ENSMUST  | 0,0238017 | -1,24841 |
| AW555464      | NM_001024602 // AW555464 // expressed sequence AW555464 // 12 F1]12 52.67 cM //   | 0,0238257 | -1,22271 |
| Pigt          | NM_133779 // Pigt // phosphatidylinositol glycan anchor biosynthesis, class T //  | 0,0238518 | -1,20793 |
| Zdhhc8        | NM_172151 // Zdhhc8 // zinc finger, DHHC domain containing 8 // 16 A3]16 10.83 c  | 0,0238563 | -1,27603 |
| Cmtm4         | NM_153582 // Cmtm4 // CKLF-like MARVEL transmembrane domain containing 4 // 8 D3  | 0,0238656 | -1,23966 |
| Zfp804a       | NM_175513 // Zfp804a // zinc finger protein 804A // 2 D // 241514 /// ENSMUST000  | 0,0238811 | -1,42902 |
| Srf           | NM_020493 // Srf // serum response factor // 17 C // 20807 /// ENSMUST0000001574  | 0,0238972 | -1,22858 |
| Aatk          | NM_007377 // Aatk // apoptosis-associated tyrosine kinase // 11 E2 // 11302 ///   | 0,0239387 | -1,24213 |
| Akt1          | NM_009652 // Akt1 // thymoma viral proto-oncogene 1 // 12 F1]12 57.0 cM // 11651  | 0,0239509 | -1,22917 |
| Chd7          | NM_001081417 // Chd7 // chromodomain helicase DNA binding protein 7 // 4 A1]4 1.  | 0,0239514 | -1,2488  |
| Fam189b       | BC088990 // Fam189b // family with sequence similarity 189, member B // 3 F1 //   | 0,0239663 | -1,25679 |
| Esyt2         | NM_028731 // Esyt2 // extended synaptotagmin-like protein 2 // 12 F2]12 59.2 cM   | 0,0239695 | -1,22618 |
| Dnajc13       | NM_001163026 // Dnajc13 // DnaJ (Hsp40) homolog, subfamily C, member 13 // 9 F1   | 0,0239971 | -1,33696 |

|               |                                                                                   |           |          |
|---------------|-----------------------------------------------------------------------------------|-----------|----------|
| Tns1          | NM_027884 // Tns1 // tensin 1 // 1 C3 1 44.5 cM // 21961                          | 0,0240239 | -1,30325 |
| Ajap1         | NM_001099299 // Ajap1 // adherens junction associated protein 1 // 4 E2 // 23095  | 0,0240242 | -1,3595  |
| Btbd2         | NM_145361 // Btbd2 // BTB (POZ) domain containing 2 // 10 C1 // 208198 // ENSMU   | 0,0240284 | -1,28473 |
| Cnot1         | NM_153164 // Cnot1 // CCR4-NOT transcription complex, subunit 1 // 8 D1 // 23459  | 0,0240725 | -1,22772 |
| 3110056O03Rik | NM_175195 // 3110056O03Rik // RIKEN cDNA 3110056O03 gene // 10 C1 // 73218 // E   | 0,0240785 | -1,20919 |
| Rexo1         | NM_025852 // Rexo1 // REX1, RNA exonuclease 1 homolog (S. cerevisiae) // 10 C1 /  | 0,0241141 | -1,29831 |
| Msi1          | NM_008629 // Msi1 // Musashi homolog 1 (Drosophila) // --- // 17690 // ENSMUST00  | 0,0241169 | -1,29355 |
| Zc3h4         | NM_198631 // Zc3h4 // zinc finger CCCH-type containing 4 // 7 A2 // 330474 // E   | 0,0241444 | -1,22607 |
| Zfp628        | NM_170759 // Zfp628 // zinc finger protein 628 // 7 A1 // 232816 // ENSMUST0000   | 0,0241538 | -1,23116 |
| Prkg2         | NM_008926 // Prkg2 // protein kinase, cGMP-dependent, type II // 5 E3 5 53.0 cM   | 0,0241549 | -1,22256 |
| Sreb1         | NM_011480 // Sreb1 // sterol regulatory element binding transcription factor 1    | 0,0242694 | -1,26894 |
| Shisa4        | NM_175259 // Shisa4 // shisa homolog 4 (Xenopus laevis) // 1 E4 // 77552 // ENS   | 0,0242811 | -1,20284 |
| Arhgap21      | NM_001128084 // Arhgap21 // Rho GTPase activating protein 21 // 2 A3 // 71435 //  | 0,0243115 | -1,22478 |
| Glud1         | NM_008133 // Glud1 // glutamate dehydrogenase 1 // 14 B 14 15.5 cM // 14661 //    | 0,0243238 | -1,23707 |
| Tcf3          | NM_001164147 // Tcf3 // transcription factor 3 // 10 C1 10 43.0 cM // 21423 //    | 0,0243614 | -1,23302 |
| Ppox          | NM_008911 // Ppox // protoporphyrinogen oxidase // --- // 19044 // ENSMUST00000   | 0,0243832 | -1,22841 |
| Dcc           | NM_007831 // Dcc // deleted in colorectal carcinoma // 18 E2 18 45.0 cM // 13176  | 0,0243899 | -1,34121 |
| Pou3f4        | NM_008901 // Pou3f4 // POU domain, class 3, transcription factor 4 // X E1 X 48.  | 0,0244021 | -1,2756  |
| Mll1          | NM_001081049 // Mll1 // myeloid/lymphoid or mixed-lineage leukemia 1 // 9 A5.2 /  | 0,0244061 | -1,30526 |
| Slc12a5       | NM_020333 // Slc12a5 // solute carrier family 12, member 5 // 2 G2-G3 // 57138 /  | 0,0244119 | -1,20294 |
| Sin3b         | NM_009188 // Sin3b // transcriptional regulator, SIN3B (yeast) // 8 C2 8 33.0 cM  | 0,0244514 | -1,20288 |
| Dusp8         | ENSMUST00000039926 // Dusp8 // dual specificity phosphatase 8 // 7 F5 7 69.0 cM   | 0,0245093 | -1,22475 |
| Glis2         | NM_031184 // Glis2 // GLIS family zinc finger 2 // 16 A1-B1 16 2.1 cM // 83396 /  | 0,0245094 | -1,24698 |
| Doc2b         | NM_007873 // Doc2b // double C2, beta // 11 B5 // 13447 // ENSMUST00000021209 /   | 0,0245218 | -1,32971 |
| Tbc1d2b       | NM_194334 // Tbc1d2b // TBC1 domain family, member 2B // 9 E3.1 // 67016 // ENS   | 0,0245616 | -1,24074 |
| Osbpl9        | NM_133885 // Osbpl9 // oxysterol binding protein-like 9 // 4 C7 // 100273 // NM   | 0,0245618 | -1,25342 |
| Abca1         | NM_013454 // Abca1 // ATP-binding cassette, sub-family A (ABC1), member 1 // 4 A  | 0,0245854 | -1,32459 |
| Adamts9       | NM_175314 // Adamts9 // a disintegrin-like and metalloproteinase (reprolysin type | 0,0245924 | -1,20548 |
| Pat1          | NM_172635 // Pat1 // protein associated with topoisomerase II homolog 1 (yeast)   | 0,0247096 | -1,28698 |
| Orai2         | NM_178751 // Orai2 // ORAI calcium release-activated calcium modulator 2 // 5 G2  | 0,024714  | -1,20351 |
| Med24         | NM_011869 // Med24 // mediator complex subunit 24 // 11 D 11 56.5 cM // 23989 //  | 0,0247201 | -1,24411 |
| Kcng3         | NM_153512 // Kcng3 // potassium voltage-gated channel, subfamily G, member 3 //   | 0,0247604 | -1,24596 |
| Arid2         | NM_175251 // Arid2 // AT rich interactive domain 2 (ARID, RFX-like) // 15 F1 //   | 0,0247617 | -1,28213 |
| Gm10125       | NR_033552 // Gm10125 // predicted gene 10125 // --- // 791318 // ENSMUST00000007  | 0,0247908 | -1,21392 |
| Sh2b2         | NM_018825 // Sh2b2 // SH2B adaptor protein 2 // 5 G1 // 23921 // ENSMUST00000000  | 0,0248149 | -1,23299 |
| Gm15800       | BC051044 // Gm15800 // predicted gene 15800 // 5 F // 269700 // ENSMUST00000119   | 0,024833  | -1,29245 |
| Hexim2        | NM_027658 // Hexim2 // hexamethylene bis-acetamide inducible 2 // 11 E1 // 71059  | 0,0248707 | -1,21439 |
| Mertk         | NM_008587 // Mertk // c-mer proto-oncogene tyrosine kinase // 2 F1 // 17289 //    | 0,024883  | -1,46586 |
| Cyb5r3        | NM_029787 // Cyb5r3 // cytochrome b5 reductase 3 // 15 45.2 cM // 109754 // ENS   | 0,0249032 | -1,25409 |
| Nbeal1        | NM_173444 // Nbeal1 // neurobeachin like 1 // 1 C2 // 269198                      | 0,0249082 | -1,24073 |
| Pak2          | NM_177326 // Pak2 // p21 protein (Cdc42/Rac)-activated kinase 2 // 16 B2 // 2241  | 0,0249168 | -1,20632 |
| Trdn          | NM_029726 // Trdn // triadin // 10 A4 // 76757                                    | 0,0249306 | -1,24274 |
| Ctsa          | NM_008906 // Ctsa // cathepsin A // 2 H3 2 96.0 cM // 19025 // NM_001038492 //    | 0,0249364 | -1,27573 |
| Gpr56         | NM_018882 // Gpr56 // G protein-coupled receptor 56 // 8 D1 8 45.0 cM // 14766 /  | 0,0249456 | -1,46097 |
| Ceacam1       | NM_001039185 // Ceacam1 // carcinoembryonic antigen-related cell adhesion molecu  | 0,0249531 | -1,2707  |

|               |                                                                                   |           |          |
|---------------|-----------------------------------------------------------------------------------|-----------|----------|
| Tmem39b       | NM_199305 // Tmem39b // transmembrane protein 39b // 4 D2.3 // 230770 /// ENSMUS  | 0,0249766 | -1,22832 |
| Gulp1         | NM_028450 // Gulp1 // GULP, engulfment adaptor PTB domain containing 1 // 1 C1 /  | 0,0249856 | -1,20103 |
| Grik5         | NM_008168 // Grik5 // glutamate receptor, ionotropic, kainate 5 (gamma 2) // 7 A  | 0,0250207 | -1,20914 |
| Polrmt        | NM_172551 // Polrmt // polymerase (RNA) mitochondrial (DNA directed) // 10 C1 //  | 0,0250259 | -1,20756 |
| Unc13c        | NM_001081153 // Unc13c // unc-13 homolog C (C. elegans) // 9 D // 208898 /// ENS  | 0,0250281 | -1,21452 |
| Sypl          | NM_013635 // Sypl // synaptophysin-like protein // 12 B2 12 15.0 cM // 19027 ///  | 0,0250508 | -1,2091  |
| Sod1          | NM_011434 // Sod1 // superoxide dismutase 1, soluble // 16 B5-C3 16 61.0 cM // 2  | 0,0250518 | -1,25868 |
| Szt2          | NM_198170 // Szt2 // seizure threshold 2 // 4 D2.1 // 230676 /// ENSMUST000000075 | 0,0251577 | -1,26996 |
| Sec24c        | NM_172596 // Sec24c // Sec24 related gene family, member C (S. cerevisiae) // 14  | 0,0251725 | -1,25898 |
| Dscam1        | NM_001081270 // Dscam1 // Down syndrome cell adhesion molecule-like 1 // 9 B //   | 0,0251981 | -1,33196 |
| Chd7          | NM_001081417 // Chd7 // chromodomain helicase DNA binding protein 7 // 4 A1 4 1.  | 0,0252298 | -1,21521 |
| Unc13a        | NM_001029873 // Unc13a // unc-13 homolog A (C. elegans) // 8 B3.3 // 382018 ///   | 0,0252574 | -1,2185  |
| Rgl2          | NM_009059 // Rgl2 // ral guanine nucleotide dissociation stimulator-like 2 // 17  | 0,0253074 | -1,22113 |
| Nfatc2        | NM_010899 // Nfatc2 // nuclear factor of activated T-cells, cytoplasmic, calcine  | 0,0253366 | -1,21695 |
| Smarca4       | NM_001174078 // Smarca4 // SWI/SNF related, matrix associated, actin dependent r  | 0,0253606 | -1,2629  |
| Gm1524        | ENSMUST00000103359 // Gm1524 // predicted gene 1524 // 6 C1 // 385253             | 0,0253914 | -1,23871 |
| Abca9         | NM_147220 // Abca9 // ATP-binding cassette, sub-family A (ABC1), member 9 // 11   | 0,0254175 | -1,23798 |
| Srcin1        | NM_018873 // Srcin1 // SRC kinase signaling inhibitor 1 // --- // 56013 /// ENSM  | 0,025447  | -1,23851 |
| Sorbs3        | NM_011366 // Sorbs3 // sorbin and SH3 domain containing 3 // 14 D2 14 34.5 cM //  | 0,0254555 | -1,22211 |
| Clvs1         | NM_028940 // Clvs1 // clavesin 1 // 4 A1 // 74438 /// NM_023066 // Asph // aspar  | 0,0254593 | -1,26855 |
| Acap2         | NM_030138 // Acap2 // ArfGAP with coiled-coil, ankyrin repeat and PH domains 2 /  | 0,0254602 | -1,23403 |
| Pcbp4         | NM_021567 // Pcbp4 // poly(rC) binding protein 4 // 9 F1-F2 // 59092 /// ENSMUST  | 0,0254692 | -1,35366 |
| Casp2         | NM_007610 // Casp2 // caspase 2 // 6 B2.1 6 20.5 cM // 12366 /// ENSMUST000000031 | 0,0254825 | -1,26514 |
| Cc2d2a        | NM_172274 // Cc2d2a // coiled-coil and C2 domain containing 2A // 5 B3 // 231214  | 0,0255039 | -1,25165 |
| Ndrp4         | NM_145602 // Ndrp4 // N-myc downstream regulated gene 4 // 8 D1 // 234593 /// EN  | 0,0255099 | -1,20134 |
| Zfyve26       | NM_001008550 // Zfyve26 // zinc finger, FYVE domain containing 26 // 12 C3 // 21  | 0,0255213 | -1,21153 |
| Armc5         | NM_146205 // Armc5 // armadillo repeat containing 5 // 7 F3 // 233912 /// ENSMUS  | 0,0255276 | -1,23352 |
| Zbtb4         | NM_029348 // Zbtb4 // zinc finger and BTB domain containing 4 // 11 B4 // 75580   | 0,0255411 | -1,22477 |
| Rad9          | NM_011237 // Rad9 // RAD9 homolog (S. pombe) // 19 A // 19367 /// ENSMUST00000002 | 0,0255481 | -1,2195  |
| Adamts1       | NM_009621 // Adamts1 // a disintegrin-like and metallopeptidase (reprolysin type  | 0,0255925 | -1,20028 |
| Hnrnpf        | NM_133834 // Hnrnpf // heterogeneous nuclear ribonucleoprotein F // 6 F1 // 9875  | 0,0256324 | -1,20578 |
| Tmcc2         | NM_178874 // Tmcc2 // transmembrane and coiled-coil domains 2 // 1 E4 // 68875 /  | 0,0256492 | -1,20634 |
| Slc5a2        | NM_133254 // Slc5a2 // solute carrier family 5 (sodium/glucose cotransporter), m  | 0,0256565 | -1,35044 |
| Elmo2         | NM_207706 // Elmo2 // engulfment and cell motility 2, ced-12 homolog (C. elegans  | 0,0256604 | -1,20931 |
| Hdac11        | NM_144919 // Hdac11 // histone deacetylase 11 // 6 D1 // 232232 /// ENSMUST000000 | 0,0256791 | -1,25847 |
| B930095G15Rik | BC096543 // B930095G15Rik // RIKEN cDNA B930095G15 gene // 14 E5 // 320268        | 0,0257367 | -1,34635 |
| Urgcp         | NM_178623 // Urgcp // upregulator of cell proliferation // 11 A1 // 72046 /// NM  | 0,025739  | -1,22144 |
| Aqp11         | NM_175105 // Aqp11 // aquaporin 11 // 7 E2 // 66333 /// ENSMUST0000084986 // Aq   | 0,0257523 | -1,25032 |
| Dock6         | NM_177030 // Dock6 // dedicator of cytokinesis 6 // 9 A3 // 319899 /// ENSMUST00  | 0,0258064 | -1,30068 |
| Ptch1         | NM_008957 // Ptch1 // patched homolog 1 // 13 B3 13 36.0 cM // 19206 /// ENSMUST  | 0,0258104 | -1,34125 |
| Sp1           | NM_013672 // Sp1 // trans-acting transcription factor 1 // 15 F3 // 20683 /// EN  | 0,0258509 | -1,21332 |
| Cacnb3        | NM_007581 // Cacnb3 // calcium channel, voltage-dependent, beta 3 subunit // 15   | 0,0258876 | -1,26771 |
| Btg2          | NM_007570 // Btg2 // B-cell translocation gene 2, anti-proliferative // 1 E4 1 7  | 0,0258883 | -1,30943 |
| Mapk8ip2      | NM_021921 // Mapk8ip2 // mitogen-activated protein kinase 8 interacting protein   | 0,0259765 | -1,28077 |
| Ephb4         | NM_001159571 // Ephb4 // Eph receptor B4 // 5 G2 // 13846 /// NM_010144 // Ephb4  | 0,0259924 | -1,22007 |

|               |                                                                                   |           |          |
|---------------|-----------------------------------------------------------------------------------|-----------|----------|
| Tyms          | NM_021288 // Tyms // thymidylate synthase // 5 B1 5 18.2 cM // 22171 /// NR_0334  | 0,0259933 | -1,21997 |
| Slc7a5        | NM_011404 // Slc7a5 // solute carrier family 7 (cationic amino acid transporter,  | 0,0260077 | -1,25352 |
| Tecpr1        | NM_027410 // Tecpr1 // tectonin beta-propeller repeat containing 1 // 5 G2 // 70  | 0,0260534 | -1,23681 |
| Cideb         | NM_009894 // Cideb // cell death-inducing DNA fragmentation factor, alpha subuni  | 0,0260807 | -1,24032 |
| Casp8         | NM_009812 // Casp8 // caspase 8 // 1 B 1 30.1 cM // 12370 /// NM_001080126 // Ca  | 0,0260943 | -1,24411 |
| Cox10         | NM_178379 // Cox10 // COX10 homolog, cytochrome c oxidase assembly protein, heme  | 0,0261275 | -1,29633 |
| Ptchd1        | NM_001093750 // Ptchd1 // patched domain containing 1 // X F3 // 211612 /// ENSM  | 0,026149  | -1,20046 |
| 5430417L22Rik | NR_030716 // 5430417L22Rik // RIKEN cDNA 5430417L22 gene // 2 E5 // 100043272     | 0,0261518 | -1,23425 |
| Amotl2        | NM_019764 // Amotl2 // angiostatin-like 2 // 9 F1 // 56332 /// ENSMUST00000035121 | 0,0261743 | -1,23398 |
| 2810046L04Rik | NM_173382 // 2810046L04Rik // RIKEN cDNA 2810046L04 gene // 3 C // 212127 /// EN  | 0,0261747 | -1,25871 |
| Rcan2         | NM_030598 // Rcan2 // regulator of calcineurin 2 // 17 C 17 22.0 cM // 53901 ///  | 0,0261789 | -1,21565 |
| A930017M01Rik | NR_033609 // A930017M01Rik // RIKEN cDNA A930017M01 gene // 15 B3.3 // 239410     | 0,0262012 | -1,20855 |
| Nat15         | NM_029090 // Nat15 // N-acetyltransferase 15 (GCN5-related, putative) // 16 A1 /  | 0,0262187 | -1,22925 |
| Cct5          | NM_007637 // Cct5 // chaperonin containing Tcp1, subunit 5 (epsilon) // 15 B3.2   | 0,0262385 | -1,2095  |
| Fam108c       | NM_133722 // Fam108c // family with sequence similarity 108, member C // 7 D3 //  | 0,026241  | -1,25008 |
| Taf1d         | AK161656 // Taf1d // TATA box binding protein (Tbp)-associated factor, RNA polym  | 0,0262571 | -1,26879 |
| Podn          | NM_172874 // Podn // podocan // 4 C7 // 242608 /// ENSMUST00000106709 // Podn //  | 0,0262872 | -1,27248 |
| Cyth3         | NM_011182 // Cyth3 // cytohesin 3 // 5 G2 5 82.0 cM // 19159 /// NM_001163548 //  | 0,0262976 | -1,20951 |
| Upf1          | NM_001122829 // Upf1 // UPF1 regulator of nonsense transcripts homolog (yeast) /  | 0,026376  | -1,2004  |
| Gxylt1        | NM_001033275 // Gxylt1 // glucoside xylosyltransferase 1 // 15 E3 // 223827 ///   | 0,0263851 | -1,23023 |
| Nrp2          | NM_001077403 // Nrp2 // neuropilin 2 // 1 C2 // 18187 /// NM_001077404 // Nrp2 /  | 0,0264409 | -1,25555 |
| Zfp773        | NM_029584 // Zfp773 // zinc finger protein 773 // 7 A1 // 76373 /// ENSMUST000000 | 0,0264726 | -1,23051 |
| Scamp5        | NM_020270 // Scamp5 // secretory carrier membrane protein 5 // 9 B // 56807 ///   | 0,0264976 | -1,21624 |
| Fam114a2      | NM_001168668 // Fam114a2 // family with sequence similarity 114, member A2 // 11  | 0,026527  | -1,23565 |
| Ubr5          | NM_001081359 // Ubr5 // ubiquitin protein ligase E3 component n-recogin 5 // 15   | 0,0265318 | -1,20954 |
| Rusc1         | NM_028188 // Rusc1 // RUN and SH3 domain containing 1 // 3 F2 // 72296 /// NM_00  | 0,0266624 | -1,29601 |
| Wnt5a         | NM_009524 // Wnt5a // wingless-related MMTV integration site 5A // 14 A3 14 7.8   | 0,0266807 | -1,30853 |
| Dab2ip        | NM_001114124 // Dab2ip // disabled homolog 2 (Drosophila) interacting protein //  | 0,0266837 | -1,22786 |
| Inpp5d        | NM_010566 // Inpp5d // inositol polyphosphate-5-phosphatase D // 1 C5 1 57.0 cM   | 0,0267429 | -1,20163 |
| Arhgef3       | NM_027871 // Arhgef3 // Rho guanine nucleotide exchange factor (GEF) 3 // 14 A3   | 0,0267632 | -1,22194 |
| Adamts9       | NM_175314 // Adamts9 // a disintegrin-like and metallopeptidase (reprolysin type  | 0,0267741 | -1,25783 |
| 9930013L23Rik | NM_030728 // 9930013L23Rik // RIKEN cDNA 9930013L23 gene // 7 D3 7 42.2 cM // 80  | 0,0268066 | -1,30634 |
| Parp6         | NM_029922 // Parp6 // poly (ADP-ribose) polymerase family, member 6 // 9 C // 67  | 0,0268263 | -1,21033 |
| Utrn          | NM_011682 // Utrn // utrophin // 10 A1 10 3.0 cM // 22288 /// ENSMUST00000076817  | 0,0268604 | -1,28642 |
| Urm1          | NM_026615 // Urm1 // ubiquitin related modifier 1 homolog (S. cerevisiae) // 2 B  | 0,0268636 | -1,2089  |
| Clasp1        | NM_001081276 // Clasp1 // CLIP associating protein 1 // 1 E2 // 76707 /// NM_177  | 0,0268974 | -1,25952 |
| Slain1        | NM_198014 // Slain1 // SLAIN motif family, member 1 // 14 E2.3 // 105439 /// ENS  | 0,0270668 | -1,27109 |
| Med12l        | NM_177855 // Med12l // mediator of RNA polymerase II transcription, subunit 12 h  | 0,027176  | -1,25716 |
| Plexn1        | NM_172775 // Plexn1 // plexin B1 // 9 F2 // 235611 /// ENSMUST00000072093 // Plx  | 0,0271868 | -1,26114 |
| Nfic          | NM_008688 // Nfic // nuclear factor // C // 10 C1 10 43.0 cM // 18029 /// NM_0267 | 0,0271965 | -1,35146 |
| Ankrd10       | NR_030779 // Ankrd10 // ankyrin repeat domain 10 // 8 A1.1 // 102334 /// NR_0307  | 0,0272044 | -1,22081 |
| 1110003O08Rik | ENSMUST00000059018 // 1110003O08Rik // RIKEN cDNA 1110003O08 gene // 8 E1 // 762  | 0,0272347 | -1,36583 |
| Vezf1         | NM_016686 // Vezf1 // vascular endothelial zinc finger 1 // 11 C // 22344 /// EN  | 0,0272518 | -1,2017  |
| Atp13a1       | NM_133224 // Atp13a1 // ATPase type 13A1 // 8 B3.3 // 170759 /// ENSMUST000000034 | 0,0272524 | -1,30015 |
| Ino80d        | NM_001114609 // Ino80d // INO80 complex subunit D // 1 C2 // 227195 /// NM_00108  | 0,0273649 | -1,24633 |

|               |                                                                                   |           |          |
|---------------|-----------------------------------------------------------------------------------|-----------|----------|
| Vim           | NM_011701 // Vim // vimentin // 2 A2 2 7.0 cM // 22352 /// ENSMUST0000028062 //   | 0,0274075 | -1,25831 |
| Trpm3         | NM_001035244 // Trpm3 // transient receptor potential cation channel, subfamily   | 0,0274184 | -1,32562 |
| Atp2b2        | NM_009723 // Atp2b2 // ATPase, Ca++ transporting, plasma membrane 2 // 6 E3 6 49  | 0,027429  | -1,21338 |
| Ascl1         | NM_008553 // Ascl1 // achaete-scute complex homolog 1 (Drosophila) // 10 C1 // 1  | 0,0274477 | -1,23661 |
| 8430427H17Rik | NM_001134300 // 8430427H17Rik // RIKEN cDNA 8430427H17 gene // 2 H1 // 329540 //  | 0,0274506 | -1,3291  |
| Ano1          | NM_178642 // Ano1 // anoctamin 1, calcium activated chloride channel // 7 F5 //   | 0,0274542 | -1,22755 |
| Psen1         | NM_008943 // Psen1 // presenilin 1 // 12 D1 12 37.0 cM // 19164 /// ENSMUST00000  | 0,0274581 | -1,20777 |
| Zc3h6         | NM_178404 // Zc3h6 // zinc finger CCCH type containing 6 // 2 F1 // 78751 /// EN  | 0,0274725 | -1,20818 |
| Celf3         | NM_172434 // Celf3 // VCUGBP, Elav-like family member 3 // 3 F2.1 // 78784 /// E  | 0,0274838 | -1,2675  |
| Mn1           | NM_001081235 // Mn1 // meningioma 1 // 5 F // 433938 /// ENSMUST0000094463 // M   | 0,0275043 | -1,3052  |
| Slit3         | NM_011412 // Slit3 // slit homolog 3 (Drosophila) // --- // 20564 /// ENSMUST000  | 0,0275078 | -1,31406 |
| Alkbh5        | NM_172943 // Alkbh5 // alkB, alkylation repair homolog 5 (E. coli) // 11 B2 // 2  | 0,0275602 | -1,21767 |
| Tet1          | NM_027384 // Tet1 // tet oncogene 1 // 10 B4 10 32.0 cM // 52463 /// ENSMUST00000 | 0,0275864 | -1,28344 |
| 583041710Rik  | NR_028359 // 583041710Rik // RIKEN cDNA 583041710 gene // 3 F1 // 100302730 //    | 0,0276604 | -1,29516 |
| Pygm          | NM_011224 // Pygm // muscle glycogen phosphorylase // 19 A 19 2.0 cM // 19309 //  | 0,0276628 | -1,2956  |
| Tnrc6a        | NM_144925 // Tnrc6a // trinucleotide repeat containing 6a // 7 F3 // 233833 ///   | 0,0277091 | -1,21539 |
| Crtc2         | NM_028881 // Crtc2 // CREB regulated transcription coactivator 2 // 3 F2 // 7434  | 0,0277454 | -1,29706 |
| Reep5         | NM_007874 // Reep5 // receptor accessory protein 5 // 18 B1 // 13476 /// ENSMUST  | 0,0277752 | -1,23138 |
| Cyp4f16       | NM_024442 // Cyp4f16 // cytochrome P450, family 4, subfamily f, polypeptide 16 /  | 0,0277872 | -1,22159 |
| Homer2        | NM_011983 // Homer2 // homer homolog 2 (Drosophila) // 7 D3 // 26557 /// NM_0011  | 0,0278322 | -1,42283 |
| Anpep         | NM_008486 // Anpep // alanyl (membrane) aminopeptidase // 7 D3 // 16790 /// ENSM  | 0,0278522 | -1,3327  |
| Slc35a4       | NM_026404 // Slc35a4 // solute carrier family 35, member A4 // 18 B3 // 67843 //  | 0,0278563 | -1,23392 |
| Tcf7l1        | NM_001079822 // Tcf7l1 // transcription factor 7-like 1 (T-cell specific, HMG bo  | 0,0278707 | -1,27553 |
| Fam70b        | NM_001143671 // Fam70b // family with sequence similarity 70, member B // 8 A1.1  | 0,0279366 | -1,2428  |
| Akt2          | NM_001110208 // Akt2 // thymoma viral proto-oncogene 2 // 7 B1 7 6.5 cM // 11652  | 0,0279449 | -1,22171 |
| Bat2          | NM_020027 // Bat2 // HLA-B associated transcript 2 // 17 B1 17 19.04 cM // 53761  | 0,0279822 | -1,26524 |
| 2310044H10Rik | NM_197991 // 2310044H10Rik // RIKEN cDNA 2310044H10 gene // 7 B4 // 69683 /// EN  | 0,0280027 | -1,25063 |
| Glx5          | NM_028419 // Glx5 // glutaredoxin 5 homolog (S. cerevisiae) // 12 E // 73046 //   | 0,0280123 | -1,21427 |
| Lrch1         | NM_001033439 // Lrch1 // leucine-rich repeats and calponin homology (CH) domain   | 0,0280181 | -1,29636 |
| Lrtm2         | NM_172492 // Lrtm2 // leucine-rich repeats and transmembrane domains 2 // 6 F1 /  | 0,0281219 | -1,30213 |
| Rfx4          | NM_001024918 // Rfx4 // regulatory factor X, 4 (influences HLA class II expressi  | 0,0281429 | -1,28309 |
| Adam15        | NM_001037722 // Adam15 // a disintegrin and metallopeptidase domain 15 (metargid  | 0,0281499 | -1,2302  |
| Trrap         | NM_001081362 // Trrap // transformation/transcription domain-associated protein   | 0,0281842 | -1,26738 |
| Ccdc115       | NM_027159 // Ccdc115 // coiled-coil domain containing 115 // 1 B // 69668 /// EN  | 0,0281929 | -1,20806 |
| Nudcd3        | NM_173748 // Nudcd3 // NudC domain containing 3 // 11 A1 // 209586 /// ENSMUST00  | 0,0282239 | -1,20289 |
| Mdga1         | NM_001081160 // Mdga1 // MAM domain containing glycosylphosphatidylinositol anch  | 0,028235  | -1,46188 |
| Agri          | NM_021604 // Agri // agrin // 4 E2 4 80.0 cM // 11603 /// ENSMUST00000075787 //   | 0,0282573 | -1,28046 |
| Scrt1         | NM_130893 // Scrt1 // scratch homolog 1, zinc finger protein (Drosophila) // 15   | 0,0282693 | -1,27373 |
| Cacna1e       | NM_009782 // Cacna1e // calcium channel, voltage-dependent, R type, alpha 1E sub  | 0,0282814 | -1,2708  |
| Nynrin        | NM_001040072 // Nynrin // NYN domain and retroviral integrase containing // 14 C  | 0,0282979 | -1,4146  |
| Pcif1         | NM_146129 // Pcif1 // PDX1 C-terminal inhibiting factor 1 // 2 H3 // 228866 ///   | 0,0283132 | -1,20696 |
| Ddx21         | NM_019553 // Ddx21 // DEAD (Asp-Glu-Ala-Asp) box polypeptide 21 // 10 B4-B5.1 //  | 0,0283385 | -1,20121 |
| Naa10         | NM_001177965 // Naa10 // N(alpha)-acetyltransferase 10, NatA catalytic subunitNa  | 0,0283611 | -1,21718 |
| Kcnb1         | NM_008420 // Kcnb1 // potassium voltage gated channel, Shab-related subfamily, m  | 0,0283636 | -1,27398 |
| Ebf1          | NM_007897 // Ebf1 // early B-cell factor 1 // 11 B1.1 11 20.0 cM // 13591 /// EN  | 0,0283731 | -1,3971  |

|               |                                                                                  |           |          |
|---------------|----------------------------------------------------------------------------------|-----------|----------|
| Mllt4         | NM_010806 // Mllt4 // myeloid/lymphoid or mixed-lineage leukemia (trithorax homo | 0,028445  | -1,2361  |
| Crebbp        | ENSMUST00000100216 // Crebbp // CREB binding protein // 16 A1 // 12914           | 0,0284858 | -1,29867 |
| Limk1         | NM_010717 // Limk1 // LIM-domain containing, protein kinase // 5 G2 5 75.0 cM // | 0,0284879 | -1,21557 |
| Sos2          | NM_001135559 // Sos2 // son of sevenless homolog 2 (Drosophila) // 12 C3-D 12 30 | 0,0285148 | -1,23179 |
| Zmym3         | NM_001177985 // Zmym3 // zinc finger, MYM-type 3 // X C-D X 57.0 cM // 56364 /// | 0,0285481 | -1,23522 |
| Nrxn2         | NM_020253 // Nrxn2 // neurexin II // 19 A 19 // 18190 /// ENSMUST00000113462 //  | 0,0285575 | -1,21206 |
| Tubgcp6       | NM_001163319 // Tubgcp6 // tubulin, gamma complex associated protein 6 // 15 E3  | 0,0285736 | -1,26816 |
| Ikzf2         | NM_011770 // Ikzf2 // IKAROS family zinc finger 2 // 1 C3 // 22779 /// ENSMUST00 | 0,0286054 | -1,20586 |
| Tmem189       | NM_145538 // Tmem189 // transmembrane protein 189 // 2 H3 // 407243 /// ENSMUSTO | 0,0286065 | -1,22414 |
| Arid1b        | NM_001085355 // Arid1b // AT rich interactive domain 1B (SWI-like) // 17 A1 // 2 | 0,0286552 | -1,27899 |
| Tsc22d1       | NM_207652 // Tsc22d1 // TSC22 domain family, member 1 // 14 D3 14 42.0 cM // 218 | 0,0286607 | -1,26282 |
| Opn3          | NM_010098 // Opn3 // opsin 3 // 1 H3 // 13603 /// ENSMUST00000027809 // Opn3 //  | 0,0287404 | -1,25595 |
| 3222401L13Rik | ENSMUST00000097608 // 3222401L13Rik // RIKEN cDNA 3222401L13 gene // 18 B3 // 32 | 0,0287506 | -1,24145 |
| Tcfe3         | NM_172472 // Tcfe3 // transcription factor E3 // X A2 // 209446 /// NM_001105196 | 0,0287637 | -1,21592 |
| Eif4g3        | NM_172703 // Eif4g3 // eukaryotic translation initiation factor 4 gamma, 3 // 4  | 0,0287654 | -1,22451 |
| Obfc2b        | NM_027257 // Obfc2b // oligonucleotide/oligosaccharide-binding fold containing 2 | 0,0288367 | -1,29218 |
| A130022J15Rik | BC048939 // A130022J15Rik // RIKEN cDNA A130022J15 gene // 6 D3 // 101351 /// NM | 0,0288566 | -1,29183 |
| Galnt2        | NM_139272 // Galnt2 // UDP-N-acetyl-alpha-D-galactosamine:polypeptide N-acetylga | 0,0288936 | -1,23082 |
| 6720456H20Rik | NM_172600 // 6720456H20Rik // RIKEN cDNA 6720456H20 gene // 14 C1 // 218989 ///  | 0,0288939 | -1,28975 |
| Mink1         | NM_001045959 // Mink1 // misshapen-like kinase 1 (zebrafish) // 11 B4 // 50932 / | 0,0289287 | -1,27775 |
| Nsd1          | NM_008739 // Nsd1 // nuclear receptor-binding SET-domain protein 1 // 13 B1 // 1 | 0,0289517 | -1,23004 |
| Adcy1         | NM_009622 // Adcy1 // adenylate cyclase 1 // 11 A2 // 432530 /// ENSMUST00000020 | 0,0289754 | -1,24535 |
| Sdf2l1        | NM_022324 // Sdf2l1 // stromal cell-derived factor 2-like 1 // 16 A3 // 64136 // | 0,0289787 | -1,22838 |
| Lmtk3         | NM_001005511 // Lmtk3 // lemur tyrosine kinase 3 // 7 B4 // 381983 /// ENSMUST00 | 0,0290348 | -1,26191 |
| Bcl9          | NM_029933 // Bcl9 // B-cell CLL/lymphoma 9 // 3 F2 // 77578 /// ENSMUST000000465 | 0,0290591 | -1,25785 |
| Ust           | NM_177387 // Ust // uronyl-2-sulfotransferase // 10 A1 // 338362 /// ENSMUST0000 | 0,0291984 | -1,30612 |
| Zfp746        | NM_001163475 // Zfp746 // zinc finger protein 746 // 6 B2.3 // 69228 /// ENSMUST | 0,0291992 | -1,20999 |
| Zfp87         | NM_133228 // Zfp87 // zinc finger protein 87 // 13 B3 13 43.0 cM // 170763 /// E | 0,0292431 | -1,25666 |
| Enpep         | NM_007934 // Enpep // glutamyl aminopeptidase // 3 G3 3 65.2 cM // 13809 /// ENS | 0,0292624 | -1,20471 |
| Lmtk2         | NM_001081109 // Lmtk2 // lemur tyrosine kinase 2 // 5 G2 // 231876 /// ENSMUST00 | 0,0292895 | -1,20834 |
| Ftl1          | NM_010240 // Ftl1 // ferritin light chain 1 // 7 B4 // 14325 /// BC150761 // Ftl | 0,0293177 | -1,20652 |
| Usp54         | NM_030180 // Usp54 // ubiquitin specific peptidase 54 // 14 A3 // 78787 /// ENSM | 0,0293316 | -1,29353 |
| Lpcat4        | NM_207206 // Lpcat4 // lysophosphatidylcholine acyltransferase 4 // 2 E3 // 9901 | 0,0293553 | -1,28991 |
| Wipf2         | NM_197940 // Wipf2 // WAS/WASL interacting protein family, member 2 // 11 D // 6 | 0,0293703 | -1,32032 |
| Klhl13        | NM_026167 // Klhl13 // kelch-like 13 (Drosophila) // X A2 // 67455 /// ENSMUST00 | 0,0293829 | -1,22741 |
| 2610034B18Rik | BC031379 // 2610034B18Rik // RIKEN cDNA 2610034B18 gene // 7 D2 // 70420 /// NM_ | 0,0293866 | -1,22434 |
| Cdon          | NM_021339 // Cdon // cell adhesion molecule-related/down-regulated by oncogenes  | 0,0293959 | -1,20751 |
| Iqsec1        | NM_001134384 // Iqsec1 // IQ motif and Sec7 domain 1 // 6 D1 6 38.0 cM // 232227 | 0,0294139 | -1,23925 |
| Hus1          | NM_008316 // Hus1 // Hus1 homolog (S. pombe) // 11 A1 11 3.0 cM // 15574 /// ENS | 0,0296364 | -1,24061 |
| Sqrdl         | NM_021507 // Sqrdl // sulfide quinone reductase-like (yeast) // 2 F2 // 59010 // | 0,0296458 | -1,2031  |
| Grm2          | NM_001160353 // Grm2 // glutamate receptor, metabotropic 2 // 9 F1 // 108068 /// | 0,0297208 | -1,28723 |
| Klf3          | NM_008453 // Klf3 // Kruppel-like factor 3 (basic) // 5 C3.1 // 16599 /// DQ9818 | 0,0297213 | -1,27845 |
| Serinc3       | NM_012032 // Serinc3 // serine incorporator 3 // 2 H3 // 26943 /// ENSMUST000000 | 0,029739  | -1,26383 |
| Pdlim5        | NM_019808 // Pdlim5 // PDZ and LIM domain 5 // 3 H3 // 56376 /// NM_019809 // Pd | 0,0298019 | -1,21137 |
| Sf3a1         | NM_026175 // Sf3a1 // splicing factor 3a, subunit 1 // 11 A1 // 67465 /// ENSMUS | 0,0298173 | -1,22971 |

|               |                                                                                   |           |          |
|---------------|-----------------------------------------------------------------------------------|-----------|----------|
| Cadm1         | NM_207675 // Cadm1 // cell adhesion molecule 1 // 9 B-C // 54725 /// NM_018770 /  | 0,029885  | -1,20595 |
| Gbe1          | NM_028803 // Gbe1 // glucan (1,4-alpha-), branching enzyme 1 // 16 C2 16 41.9 cM  | 0,0299185 | -1,22457 |
| Txndc12       | NM_025334 // Txndc12 // thioredoxin domain containing 12 (endoplasmic reticulum)  | 0,0299276 | -1,21361 |
| Fabp7         | NM_021272 // Fabp7 // fatty acid binding protein 7, brain // 10 B4 // 12140 ///   | 0,0299755 | -1,55418 |
| Usp31         | NM_001033173 // Usp31 // ubiquitin specific peptidase 31 // 7 F2 // 76179 /// EN  | 0,0299763 | -1,26951 |
| Smo           | NM_176996 // Smo // smoothened homolog (Drosophila) // 6 A3.3 // 319757 /// ENSM  | 0,029988  | -1,36982 |
| C630004H02Rik | BC024617 // C630004H02Rik // RIKEN cDNA C630004H02 gene // 11 E2 // 217310 /// E  | 0,0300132 | -1,22477 |
| A2bp1         | NM_021477 // A2bp1 // ataxin 2 binding protein 1 // 16 A1 16 7.2 cM // 268859 /// | 0,0300429 | -1,22907 |
| Rapgef2       | NM_001099624 // Rapgef2 // Rap guanine nucleotide exchange factor (GEF) 2 // 3 E  | 0,0300467 | -1,24901 |
| Card6         | NM_001163138 // Card6 // caspase recruitment domain family, member 6 // 15 A1 //  | 0,0301451 | -1,23737 |
| Yes1          | NM_009535 // Yes1 // Yamaguchi sarcoma viral (v-yes) oncogene homolog 1 // 5 B1   | 0,030183  | -1,20017 |
| Qpct          | NM_027455 // Qpct // glutaminyl-peptide cyclotransferase (glutaminyl cyclase) //  | 0,0301999 | -1,26673 |
| Nat8l         | NM_001001985 // Nat8l // N-acetyltransferase 8-like // 5 B2 // 269642 /// ENSMUS  | 0,0302022 | -1,34054 |
| Emp2          | NM_007929 // Emp2 // epithelial membrane protein 2 // 16 A1 16 2.4 cM // 13731 /  | 0,0302024 | -1,28695 |
| Adamts3       | NM_177872 // Adamts3 // a disintegrin-like and metallopeptidase (reprolysin type  | 0,0302969 | -1,24955 |
| Kcnh4         | NM_001081194 // Kcnh4 // potassium voltage-gated channel, subfamily H (eag-relat  | 0,0303421 | -1,22973 |
| Cdc42ep4      | NM_020006 // Cdc42ep4 // CDC42 effector protein (Rho GTPase binding) 4 // 11 E2   | 0,0303772 | -1,21352 |
| Wiz           | NR_033525 // Wiz // widely-interspaced zinc finger motifs // 17 B2 // 22404 ///   | 0,0304459 | -1,25555 |
| Clec2l        | NM_001101507 // Clec2l // C-type lectin domain family, member L // 6 B1 // 66518  | 0,0304629 | -1,20062 |
| Elavl3        | ENSMUST0000003501 // Elavl3 // ELAV (embryonic lethal, abnormal vision, Drosoph   | 0,0304694 | -1,24356 |
| Gjc3          | NM_080450 // Gjc3 // gap junction protein, gamma 3 // 5 G2 // 118446 /// ENSMUST  | 0,0304802 | -1,31581 |
| Josd1         | NM_028792 // Josd1 // Josephin domain containing 1 // 15 E1 // 74158 /// BC08676  | 0,0305145 | -1,27486 |
| Gdf10         | NM_145741 // Gdf10 // growth differentiation factor 10 // 14 B 14 13.0 cM // 145  | 0,0305273 | -1,22322 |
| 1700025G04Rik | NM_197990 // 1700025G04Rik // RIKEN cDNA 1700025G04 gene // 1 G2 // 69399 /// EN  | 0,0305536 | -1,27331 |
| Npdc1         | NM_008721 // Npdc1 // neural proliferation, differentiation and control gene 1 /  | 0,0305712 | -1,23576 |
| Lrba          | NM_030695 // Lrba // LPS-responsive beige-like anchor // -- // 80877 /// NM_001   | 0,0306028 | -1,21214 |
| Ddit3         | NM_007837 // Ddit3 // DNA-damage inducible transcript 3 // 10 D3 // 13198 /// NM  | 0,0306354 | -1,28945 |
| Vcan          | NM_001081249 // Vcan // versican // 13 C3 13 55.0 cM // 13003 /// NM_019389 // V  | 0,0306435 | -1,20745 |
| Aldh18a1      | NM_019698 // Aldh18a1 // aldehyde dehydrogenase 18 family, member A1 // 19 C3 //  | 0,0306436 | -1,20604 |
| Slc35b1       | NM_016752 // Slc35b1 // solute carrier family 35, member B1 // 11 D 11 55.5 cM /  | 0,0307295 | -1,21326 |
| Ints1         | NM_026748 // Ints1 // integrator complex subunit 1 // 5 G1 // 68510 /// ENSMUST0  | 0,0307652 | -1,32931 |
| Hs6st2        | NM_001077202 // Hs6st2 // heparan sulfate 6-O-sulfotransferase 2 // X A3.3 // 50  | 0,0307879 | -1,20946 |
| Thsd7a        | NM_001164805 // Thsd7a // thrombospondin, type I, domain containing 7A // 6 A1 /  | 0,0308021 | -1,29481 |
| Akap2         | ENSMUST00000107600 // Akap2 // A kinase (PRKA) anchor protein 2 // 4 B3 // 11641  | 0,0308124 | -1,30683 |
| Zfp30         | NM_013705 // Zfp30 // zinc finger protein 30 // 7 B1 7 7.0 cM // 22693 /// ENSMU  | 0,0308337 | -1,21502 |
| Gpld1         | NM_008156 // Gpld1 // glycosylphosphatidylinositol specific phospholipase D1 //   | 0,0308477 | -1,20435 |
| Map3k12       | NM_001163643 // Map3k12 // mitogen-activated protein kinase kinase kinase 12 //   | 0,0308578 | -1,22949 |
| Susd4         | NM_144796 // Susd4 // sushi domain containing 4 // 1 H5 // 96935 /// ENSMUST0000  | 0,0309063 | -1,21887 |
| E130203B14Rik | NM_178791 // E130203B14Rik // RIKEN cDNA E130203B14 gene // 14 B // 320736 /// E  | 0,0309403 | -1,23445 |
| Dpp9          | NM_172624 // Dpp9 // dipeptidylpeptidase 9 // 17 D // 224897 /// ENSMUST00000038  | 0,030941  | -1,25371 |
| Vrk3          | NM_133945 // Vrk3 // vaccinia related kinase 3 // 7 B4 // 101568 /// ENSMUST0000  | 0,030968  | -1,23739 |
| Tulp4         | NM_054040 // Tulp4 // tubby like protein 4 // 17 A1 17 3.2 cM // 68842 /// NM_00  | 0,0309789 | -1,27706 |
| Slc7a11       | NM_011990 // Slc7a11 // solute carrier family 7 (cationic amino acid transporter  | 0,0310337 | -1,32706 |
| Dchs1         | NM_001162943 // Dchs1 // dachsous 1 (Drosophila) // 7 E3 // 233651 /// ENSMUST00  | 0,0310452 | -1,3197  |
| Gsk3a         | NM_001031667 // Gsk3a // glycogen synthase kinase 3 alpha // 7 A3 // 606496 ///   | 0,0310514 | -1,2102  |



|           |                                                                                   |           |          |
|-----------|-----------------------------------------------------------------------------------|-----------|----------|
| Myo1c     | NM_008659 // Myo1c // myosin IC // 11 C-E1[11 44.13 cM // 17913 /// NM_001080775  | 0,0310659 | -1,20579 |
| Fchsd2    | NM_199012 // Fchsd2 // FCH and double SH3 domains 2 // 7 E3 // 207278 /// NM_001  | 0,031076  | -1,2107  |
| Lrp1      | NM_008512 // Lrp1 // low density lipoprotein receptor-related protein 1 // 10 B2  | 0,0311103 | -1,34808 |
| Slc41a1   | NM_173865 // Slc41a1 // solute carrier family 41, member 1 // 1 E4 // 98396 ///   | 0,0311776 | -1,37025 |
| Chsy1     | NM_001081163 // Chsy1 // chondroitin sulfate synthase 1 // 7 C // 269941 /// ENS  | 0,0311807 | -1,20269 |
| Tada3     | NM_133932 // Tada3 // transcriptional adaptor 3 // 6 E3 // 101206 /// ENSMUST000  | 0,0312304 | -1,20156 |
| Plod3     | NM_011962 // Plod3 // procollagen-lysine, 2-oxoglutarate 5-dioxygenase 3 // 5 G2  | 0,0312512 | -1,21592 |
| Hr        | NM_021877 // Hr // hairless // 14 D2 // 15460 /// ENSMUST00000022691 // Hr // ha  | 0,0312731 | -1,22384 |
| Fam59b    | NM_001167879 // Fam59b // family with sequence similarity 59, member B // 5 B1 /  | 0,031274  | -1,27977 |
| Tgfb2     | NM_009367 // Tgfb2 // transforming growth factor, beta 2 // 1 H5[1 101.5 cM // 2  | 0,0312853 | -1,28546 |
| Bcor1     | NM_178782 // Bcor1 // BCL6 co-repressor-like 1 // X A4 // 320376 /// ENSMUST000   | 0,0312934 | -1,2461  |
| Lhfp4     | NM_177763 // Lhfp4 // lipoma HMGIC fusion partner-like protein 4 // 6 E3 // 269   | 0,0313055 | -1,2488  |
| Heatr5a   | NM_177171 // Heatr5a // HEAT repeat containing 5A // 12 C1 // 320487 /// ENSMUST  | 0,0313675 | -1,25022 |
| Krtap10-4 | NM_001135991 // Krtap10-4 // keratin associated protein 10-4 // 10[10 // 1001910  | 0,0313775 | -1,32949 |
| Slc38a1   | NM_001166456 // Slc38a1 // solute carrier family 38, member 1 // 15 F1 // 105727  | 0,0314264 | -1,26231 |
| Tlcd1     | NM_026708 // Tlcd1 // TLC domain containing 1 // 11 B5 // 68385 /// ENSMUST00000  | 0,0314498 | -1,22591 |
| Nkrf      | NM_029891 // Nkrf // NF-kappaB repressing factor // X A3.3 // 77286 /// ENSMUST0  | 0,031456  | -1,21317 |
| Tmem8     | NM_021793 // Tmem8 // transmembrane protein 8 (five membrane-spanning domains) /  | 0,0314689 | -1,26638 |
| Tmem47    | NM_138751 // Tmem47 // transmembrane protein 47 // X A7.2 // 192216 /// ENSMUST0  | 0,0315397 | -1,271   |
| H13       | NM_001159551 // H13 // histocompatibility 13 // 2 H1[2 86.0 cM // 14950 /// NM_0  | 0,0315643 | -1,20671 |
| Elfn2     | NM_183141 // Elfn2 // leucine rich repeat and fibronectin type III, extracellular | 0,0315668 | -1,23879 |
| Csnk1g2   | NM_134002 // Csnk1g2 // casein kinase 1, gamma 2 // 10 C1 // 103236 /// NM_00115  | 0,0315697 | -1,21238 |
| Atp1b2    | NM_013415 // Atp1b2 // ATPase, Na+/K+ transporting, beta 2 polypeptide // 11 B3]  | 0,0316494 | -1,30104 |
| Clcn7     | NM_011930 // Clcn7 // chloride channel 7 // 17 A3.3[17 10.0 cM // 26373 /// ENSM  | 0,0317732 | -1,24368 |
| Mtrr      | NM_172480 // Mtrr // 5-methyltetrahydrofolate-homocysteine methyltransferase red  | 0,0317832 | -1,27829 |
| Dnajc14   | NM_028873 // Dnajc14 // DnaJ (Hsp40) homolog, subfamily C, member 14 // 10 D3 //  | 0,0318067 | -1,22484 |
| Snord53   | NR_028551 // Snord53 // small nucleolar RNA, C/D box 53 // 17[17 // 100217456     | 0,0318382 | -1,21243 |
| Neto2     | NM_001081324 // Neto2 // neuropilin (NRP) and tolloid (TLL)-like 2 // 8 C4 // 74  | 0,0318438 | -1,23462 |
| Bche      | NM_009738 // Bche // butyrylcholinesterase // 3 E3 // 12038 /// ENSMUST000000293  | 0,0319739 | -1,42509 |
| Mttr11    | NM_181409 // Mttr11 // myotubularin related protein 11 // 3 F2.1 // 194126 /// E  | 0,0319928 | -1,2238  |
| Scmh1     | NM_013883 // Scmh1 // sex comb on midleg homolog 1 // 4 D1-D2[4 56.5 cM // 29871  | 0,0319945 | -1,28408 |
| Msto1     | NM_144898 // Msto1 // misato homolog 1 (Drosophila) // 3 F1 // 229524 /// ENSMUS  | 0,0319957 | -1,22435 |
| Setd2     | NM_001081340 // Setd2 // SET domain containing 2 // 9 F2 // 235626 /// ENSMUST00  | 0,0320207 | -1,25557 |
| Gstm5     | NM_010360 // Gstm5 // glutathione S-transferase, mu 5 // 3 F2.3 // 14866 /// ENS  | 0,0320387 | -1,22805 |
| Hist3h2a  | NM_178218 // Hist3h2a // histone cluster 3, H2a // --- // 319162 /// ENSMUST0000  | 0,0320685 | -1,22367 |
| Epb4.113  | NM_013813 // Epb4.113 // erythrocyte protein band 4.1-like 3 // 17 E1.3[17 42.5   | 0,0320901 | -1,21979 |
| Tmtc1     | NM_198967 // Tmtc1 // transmembrane and tetratricopeptide repeat containing 1 //  | 0,0320936 | -1,20316 |
| Edem1     | NM_138677 // Edem1 // ER degradation enhancer, mannosidase alpha-like 1 // --- /  | 0,032139  | -1,21733 |
| Shc3      | NM_009167 // Shc3 // src homology 2 domain-containing transforming protein C3 //  | 0,0321938 | -1,22488 |
| Kcng1     | NM_001081134 // Kcng1 // potassium voltage-gated channel, subfamily G, member 1   | 0,0322021 | -1,39318 |
| Syt9      | NM_021889 // Syt9 // synaptotagmin IX // 7 F2 // 60510 /// ENSMUST00000073459 //  | 0,0322476 | -1,40169 |
| Nat6      | NM_019750 // Nat6 // N-acetyltransferase 6 // 9 F1[9 60.15 cM // 56441 /// ENSMU  | 0,0322583 | -1,21945 |
| Atg2b     | NM_029654 // Atg2b // ATG2 autophagy related 2 homolog B (S. cerevisiae) // 12 E  | 0,0322669 | -1,2271  |
| Neur14    | NM_001013414 // Neur14 // neuralized homolog 4 (Drosophila) // 11 B3 // 216860 /  | 0,0322806 | -1,2599  |
| Mtss1     | NM_001146180 // Mtss1 // metastasis suppressor 1 // 15 D1 // 211401 /// NM_14480  | 0,032401  | -1,23972 |

|          |                                                                                   |           |          |
|----------|-----------------------------------------------------------------------------------|-----------|----------|
| Tctn1    | NM_001039153 // Tctn1 // tectonic family member 1 // 5 F // 654470 /// NM_001042  | 0,0324523 | -1,25648 |
| Dock6    | NM_177030 // Dock6 // dedicator of cytokinesis 6 // 9 A3 // 319899 /// ENSMUST00  | 0,0324754 | -1,29127 |
| Shroom4  | NM_001040459 // Shroom4 // shroom family member 4 // X A1.1 // 208431 /// ENSMUS  | 0,0324825 | -1,20412 |
| Wdtdc1   | NM_199306 // Wdtdc1 // WD and tetratricopeptide repeats 1 // 4 D2.3 // 230796 /// | 0,0325433 | -1,23665 |
| Homer2   | NM_011983 // Homer2 // homer homolog 2 (Drosophila) // 7 D3 // 26557 /// NM_0011  | 0,032566  | -1,2762  |
| Peli2    | NM_033602 // Peli2 // pellino 2 // 14 C1 14 16.5 cM // 93834 /// ENSMUST00000073  | 0,032615  | -1,27503 |
| Ltpb3    | NM_008520 // Ltpb3 // latent transforming growth factor beta binding protein 3 /  | 0,0326221 | -1,27164 |
| Ssr3     | NM_026155 // Ssr3 // signal sequence receptor, gamma // 3 E1 // 67437 /// ENSMUS  | 0,0326414 | -1,23403 |
| Pabpc12b | XR_033707 // Pabpc12b // poly(A) binding protein, cytoplasmic 1-like 2B // X D    | 0,0326992 | -1,30087 |
| Pabpc12b | XR_033707 // Pabpc12b // poly(A) binding protein, cytoplasmic 1-like 2B // X D    | 0,0326996 | -1,30087 |
| Ranbp2   | NM_011240 // Ranbp2 // RAN binding protein 2 // 10 B4 10 30.0 cM // 19386 /// EN  | 0,0327121 | -1,20891 |
| Fem1a    | NM_010192 // Fem1a // feminization 1 homolog a (C. elegans) // 17 D 17 37.5 cM /  | 0,0327194 | -1,25871 |
| Zfx2     | NM_001039198 // Zfx2 // zinc finger homeobox 2 // 14 C3 // 239102 /// NR_004444   | 0,0327263 | -1,26912 |
| Nol6     | NM_139236 // Nol6 // nucleolar protein family 6 (RNA-associated) // 4 A5 // 2300  | 0,0327359 | -1,25414 |
| Tspan18  | NM_183180 // Tspan18 // tetraspanin 18 // 2 E1 // 241556 /// ENSMUST0000011265    | 0,0327818 | -1,37384 |
| Nrbp2    | NM_144847 // Nrbp2 // nuclear receptor binding protein 2 // 15 D3 // 223649 ///   | 0,0328742 | -1,36211 |
| Tceb3    | NM_013736 // Tceb3 // transcription elongation factor B (SIII), polypeptide 3 //  | 0,0328939 | -1,22029 |
| Slc22a6  | NM_008766 // Slc22a6 // solute carrier family 22 (organic anion transporter), me  | 0,0329263 | -1,3064  |
| Eil      | NM_007924 // Eil // elongation factor RNA polymerase II // --- // 13716 /// ENSM  | 0,0329708 | -1,22434 |
| L1cam    | NM_008478 // L1cam // L1 cell adhesion molecule // X A6-B X 29.51 cM // 16728 //  | 0,0329782 | -1,28486 |
| Grin2b   | NM_008171 // Grin2b // glutamate receptor, ionotropic, NMDA2B (epsilon 2) // 6 G  | 0,0329939 | -1,21167 |
| Cpne6    | NM_001136057 // Cpne6 // copine VI // 14 C3 // 12891 /// NM_001146183 // Cpne6 /  | 0,0329971 | -1,26875 |
| Gpr176   | NM_201367 // Gpr176 // G protein-coupled receptor 176 // 2 E5 // 381413 /// ENSM  | 0,0330054 | -1,20374 |
| Hs6st3   | NM_015820 // Hs6st3 // heparan sulfate 6-O-sulfotransferase 3 // 14 E4 // 50787   | 0,0330191 | -1,30683 |
| Slc35e3  | NM_029875 // Slc35e3 // solute carrier family 35, member E3 // 10 D2 // 215436 /  | 0,0331417 | -1,20386 |
| Kit      | NM_001122733 // Kit // kit oncogene // 5 C3.3 5 42.0 cM // 16590 /// NM_021099 /  | 0,0331654 | -1,24128 |
| Syne2    | NM_001005510 // Syne2 // synaptic nuclear envelope 2 // 12 C3 // 319565           | 0,0331951 | -1,21483 |
| G3bp1    | NM_013716 // G3bp1 // Ras-GTPase-activating protein SH3-domain binding protein 1  | 0,0332185 | -1,20489 |
| Apccd1   | NM_133237 // Apccd1 // adenomatous polyposis coli down-regulated 1 // 18 E1 //    | 0,0332377 | -1,31756 |
| Snora44  | AF357394 // Snora44 // small nucleolar RNA, H/ACA box 44 // 4 4 // 100217418      | 0,0332549 | -1,32446 |
| BC017647 | NM_145430 // BC017647 // cDNA sequence BC017647 // 11 B5 // 216971 /// ENSMUST00  | 0,0332803 | -1,2333  |
| Unc5c    | NM_009472 // Unc5c // unc-5 homolog C (C. elegans) // 3 H1 3 68.5 cM // 22253 //  | 0,0333225 | -1,21178 |
| Gltscr1  | NM_001081418 // Gltscr1 // glioma tumor suppressor candidate region gene 1 // 7   | 0,03333   | -1,34968 |
| Slc41a3  | NM_027868 // Slc41a3 // solute carrier family 41, member 3 // 6 D2 // 71699 ///   | 0,0333621 | -1,23958 |
| Gdf1     | NM_001163282 // Gdf1 // growth differentiation factor 1 // 8 B3.3 // 14559 /// N  | 0,0334102 | -1,21016 |
| Mcrs1    | NM_016766 // Mcrs1 // microspherule protein 1 // 15 F1 // 51812 /// NM_001164156  | 0,0334138 | -1,22046 |
| Grip1    | NM_028736 // Grip1 // glutamate receptor interacting protein 1 // 10 D2 10 77.0   | 0,0334181 | -1,21213 |
| Fkbp15   | NM_001045528 // Fkbp15 // FK506 binding protein 15 // 4 B3 // 338355 /// ENSMUST  | 0,0335142 | -1,29532 |
| Smpd2    | NM_009213 // Smpd2 // sphingomyelin phosphodiesterase 2, neutral // 10 B2 // 205  | 0,0335851 | -1,22722 |
| Wipf3    | NM_001167860 // Wipf3 // WAS/WASL interacting protein family, member 3 // 6 B3 /  | 0,0336057 | -1,2979  |
| Ppp2r5b  | NM_198168 // Ppp2r5b // protein phosphatase 2, regulatory subunit B (B56), beta   | 0,0336201 | -1,26135 |
| Dvl3     | NM_007889 // Dvl3 // dishevelled 3, dsh homolog (Drosophila) // 16 A3 16 13.7 cM  | 0,033666  | -1,44772 |
| Ube2r2   | NM_026275 // Ube2r2 // ubiquitin-conjugating enzyme E2R 2 // 4 B1 // 67615 /// E  | 0,0337099 | -1,23973 |
| Elfn1    | NM_175522 // Elfn1 // leucine rich repeat and fibronectin type III, extracellular | 0,0338574 | -1,23887 |
| Dock6    | NM_177030 // Dock6 // dedicator of cytokinesis 6 // 9 A3 // 319899 /// ENSMUST00  | 0,0339274 | -1,25469 |

|               |                                                                                   |           |          |
|---------------|-----------------------------------------------------------------------------------|-----------|----------|
| Anln          | NM_028390 // Anln // anillin, actin binding protein // 9 A4 // 68743 /// ENSMUST  | 0,0339425 | -1,21697 |
| 0610031J06Rik | NM_020003 // 0610031J06Rik // RIKEN cDNA 0610031J06 gene // 3 F1 // 56700 /// EN  | 0,0340024 | -1,20308 |
| Cpsf4         | NM_178576 // Cpsf4 // cleavage and polyadenylation specific factor 4 // 5 G2 //   | 0,0340456 | -1,22387 |
| Ptchd2        | NM_001083342 // Ptchd2 // patched domain containing 2 // 4 E2 // 242748 /// ENSM  | 0,0340625 | -1,22695 |
| Ttc28         | NM_024477 // Ttc28 // tetratricopeptide repeat domain 28 // 5 F // 209683 /// BC  | 0,0340877 | -1,44832 |
| Cadm2         | NM_178721 // Cadm2 // cell adhesion molecule 2 // 16 C1.3-C2 // 239857 /// NM_00  | 0,0341006 | -1,2304  |
| Npr2          | NM_173788 // Npr2 // natriuretic peptide receptor 2 // 4 B1 4 21.5 cM // 230103   | 0,0341039 | -1,27844 |
| Gatsl2        | NM_030719 // Gatsl2 // GATS protein-like 2 // 5 G1 // 80909 /// ENSMUST000000160  | 0,0341219 | -1,36099 |
| Tsc2          | NM_011647 // Tsc2 // tuberous sclerosis 2 // 17 A3.3 17 10.3 cM // 22084 /// NM_  | 0,0341273 | -1,26126 |
| Rars          | NM_025936 // Rars // arginyl-tRNA synthetase // 11 A4 // 104458 /// ENSMUST00000  | 0,0341702 | -1,23796 |
| Atp13a2       | NM_029097 // Atp13a2 // ATPase type 13A2 // 4 D3 // 74772 /// NM_001164366 // At  | 0,034217  | -1,24965 |
| 5430411K18Rik | NM_019587 // 5430411K18Rik // RIKEN cDNA 5430411K18 gene // 18 E3 // 71423 /// EN | 0,0342706 | -1,20864 |
| Syng          | NM_001115009 // Syng // synergin, gamma // 11 C // 217030 /// NM_194341 // Synr   | 0,0342759 | -1,21374 |
| Pcnx3         | NM_144868 // Pcnx3 // pecanex-like 3 (Drosophila) // 19 A // 104401 /// ENSMUST   | 0,0343037 | -1,37247 |
| Mkl1          | NM_001082536 // Mkl1 // MKL (megakaryoblastic leukemia)/myocardin-like 1 // 15 E  | 0,0343133 | -1,27813 |
| Dock10        | NM_175291 // Dock10 // dedicator of cytokinesis 10 // 1 C4 // 210293 /// ENSMUST  | 0,0343197 | -1,369   |
| Gm606         | BC086669 // Gm606 // predicted gene 606 // 16 B2 // 239789 /// ENSMUST0000008983  | 0,0343545 | -1,21137 |
| Plexb3        | NM_019587 // Plexb3 // plexin B3 // X A7.3 // 140571 /// ENSMUST0000002079 // P   | 0,0343788 | -1,2682  |
| Fbrs          | NM_010183 // Fbrs // fibrosin // 7 F4 // 14123 /// ENSMUST00000048896 // Fbrs //  | 0,0343923 | -1,30955 |
| Nrg1          | NM_178591 // Nrg1 // neuregulin 1 // 8 A3 // 211323 /// ENSMUST00000073884 // Nr  | 0,034414  | -1,20051 |
| Tgfb3         | NM_011578 // Tgfb3 // transforming growth factor, beta receptor III // 5 E5 //    | 0,0344867 | -1,26831 |
| Rbm33         | NM_028234 // Rbm33 // RNA binding motif protein 33 // 5 B1 // 381626 /// ENSMUST  | 0,034496  | -1,23373 |
| 4930471M23Rik | NM_175675 // 4930471M23Rik // RIKEN cDNA 4930471M23 gene // 5 B1 // 74919 /// EN  | 0,0345112 | -1,23786 |
| Adcy5         | NM_001012765 // Adcy5 // adenylate cyclase 5 // 16 B-5 // 224129 /// ENSMUST0000  | 0,0345558 | -1,26121 |
| Tprm          | NM_175286 // Tprm // taperin // 2 A3 // 97031 /// ENSMUST00000114336 // Tprm //   | 0,0346361 | -1,21378 |
| Trim9         | NM_053167 // Trim9 // tripartite motif-containing 9 // --- // 94090 /// NM_00111  | 0,0346433 | -1,30494 |
| Hist1h1c      | NM_015786 // Hist1h1c // histone cluster 1, H1c // 13 A2-A3 // 50708 /// ENSMUST  | 0,034663  | -1,2233  |
| 1300001I01Rik | BC072573 // 1300001I01Rik // RIKEN cDNA 1300001I01 gene // 11 B4 11 // 74148 ///  | 0,03467   | -1,2385  |
| Csf1          | NM_007778 // Csf1 // colony stimulating factor 1 (macrophage) // 3 F3 3 51.0 cM   | 0,0346855 | -1,26596 |
| Arfgef2       | NM_001085495 // Arfgef2 // ADP-ribosylation factor guanine nucleotide-exchange f  | 0,0347406 | -1,2063  |
| Hmcn1         | NM_001024720 // Hmcn1 // hemicentin 1 // 1 G1 // 545370 /// ENSMUST00000074783 // | 0,0347596 | -1,30118 |
| Il6st         | NM_010560 // Il6st // interleukin 6 signal transducer // 13 D2.2 13 67.0 cM // 1  | 0,0348631 | -1,26848 |
| Nr4a2         | NM_001139509 // Nr4a2 // nuclear receptor subfamily 4, group A, member 2 // 2 C1  | 0,0348685 | -1,51225 |
| Gm5488        | XM_001480385 // Gm5488 // predicted gene 5488 // 16 C1.3 16 // 433036             | 0,0349209 | -1,21922 |
| Dnahc7b       | NM_001160386 // Dnahc7b // dynein, axonemal, heavy chain 7B // 1 C1.1 // 227058   | 0,0349308 | -1,24241 |
| Hnmpf         | NM_133834 // Hnmpf // heterogeneous nuclear ribonucleoprotein F // 6 F1 // 9875   | 0,0349459 | -1,21715 |
| 1810010H24Rik | NM_001163473 // 1810010H24Rik // RIKEN cDNA 1810010H24 gene // 11 E1 // 69066 //  | 0,0349614 | -1,23897 |
| Nr2c2         | NM_011630 // Nr2c2 // nuclear receptor subfamily 2, group C, member 2 // 6 D1 //  | 0,0349661 | -1,20359 |
| Gm3002        | NR_033388 // Gm3002 // alpha-takusan pseudogene // 14 A1 14 // 100040852 /// BC0  | 0,034988  | -1,28267 |
| Tesk1         | NM_011571 // Tesk1 // testis specific protein kinase 1 // 4 A5-C1 // 21754 /// E  | 0,0350368 | -1,23404 |
| Fmnl1         | NM_019679 // Fmnl1 // formin-like 1 // --- // 57778 /// NM_001077698 // Fmnl1 //  | 0,035077  | -1,30274 |
| Cbfa2t3       | NM_009824 // Cbfa2t3 // core-binding factor, runt domain, alpha subunit 2, trans  | 0,0351126 | -1,27248 |
| Cep350        | NM_001039184 // Cep350 // centrosomal protein 350 // 1 G3 // 74081                | 0,0351323 | -1,26611 |
| Gm10046       | NR_033484 // Gm10046 // predicted gene 10046 // 7 A3 // 100043229 /// ENSMUST000  | 0,0351495 | -1,228   |
| Tgfb3         | NM_009368 // Tgfb3 // transforming growth factor, beta 3 // 12 D2 12 41.0 cM //   | 0,0351771 | -1,2511  |

|               |                                                                                           |           |          |
|---------------|-------------------------------------------------------------------------------------------|-----------|----------|
| Shisa7        | NM_172737 // Shisa7 // shisa homolog 7 ( <i>Xenopus laevis</i> ) // 7 A1 // 232813 /// EN | 0,0352171 | -1,27044 |
| Aff1          | NM_001080798 // Aff1 // AF4/FMR2 family, member 1 // 5 E 5 56.0 cM // 17355 ///           | 0,0352301 | -1,23499 |
| Mll2          | NM_001033276 // Mll2 // myeloid/lymphoid or mixed-lineage leukemia 2 // 15 F1 //          | 0,0352802 | -1,41428 |
| Npas2         | NM_008719 // Npas2 // neuronal PAS domain protein 2 // 1 B 1 20.0 cM // 18143 //          | 0,0354833 | -1,27362 |
| H1fx          | NM_198622 // H1fx // H1 histone family, member X // 6 D1 // 243529 /// ENSMUST00          | 0,035533  | -1,24754 |
| Zfp282        | NM_146175 // Zfp282 // zinc finger protein 282 // 6 B2.3 // 101095 /// ENSMUST00          | 0,0355919 | -1,24384 |
| Tmem195       | NM_178767 // Tmem195 // transmembrane protein 195 // 12 A3 // 319660 /// ENSMUST          | 0,035629  | -1,21181 |
| Klhl20        | NM_001039482 // Klhl20 // kelch-like 20 ( <i>Drosophila</i> ) // 1 H2.1 // 226541 /// ENS | 0,0356751 | -1,2102  |
| Galnt1        | NM_001081421 // Galnt1 // UDP-N-acetyl-alpha-D-galactosamine:polypeptide N-acet           | 0,0357251 | -1,23062 |
| Slc25a44      | NM_178696 // Slc25a44 // solute carrier family 25, member 44 // 3 F1 // 229517 /          | 0,0357482 | -1,22432 |
| Suv39h1       | NM_011514 // Suv39h1 // suppressor of variegation 3-9 homolog 1 ( <i>Drosophila</i> ) //  | 0,0357494 | -1,20782 |
| Ubap2l        | NM_028475 // Ubap2l // ubiquitin associated protein 2-like // 3 F2 3 // 74383 //          | 0,0357958 | -1,24011 |
| Csmd2         | ENSMUST00000097884 // Csmd2 // CUB and Sushi multiple domains 2 // 4 D2.2 // 329          | 0,0358512 | -1,32967 |
| Ikzf4         | NM_011772 // Ikzf4 // IKAROS family zinc finger 4 // 10 D3 // 22781 /// ENSMUST0          | 0,0358566 | -1,27697 |
| Slc22a8       | NM_031194 // Slc22a8 // solute carrier family 22 (organic anion transporter), me          | 0,0359021 | -1,30399 |
| Tmem44        | NM_172614 // Tmem44 // transmembrane protein 44 // 16 B2 // 224090 /// ENSMUST00          | 0,0359175 | -1,23362 |
| Gm15800       | ENSMUST00000119892 // Gm15800 // predicted gene 15800 // 5 F // 269700 /// ENSMU          | 0,0359348 | -1,38537 |
| Lrch3         | NM_001081255 // Lrch3 // leucine-rich repeats and calponin homology (CH) domain           | 0,0360049 | -1,21806 |
| Hdac9         | NM_024124 // Hdac9 // histone deacetylase 9 // 12 A3 // 79221 /// ENSMUST0000011          | 0,0360207 | -1,22132 |
| Inpp5k        | NM_008916 // Inpp5k // inositol polyphosphate 5-phosphatase K // 11 B5 11 44.12           | 0,0360369 | -1,22442 |
| Atn7l1        | NM_001033436 // Atn7l1 // ataxin 7-like 1 // 12 A3 // 380753 /// BC147479 // At           | 0,0360418 | -1,21901 |
| Gtpbp1        | NM_013818 // Gtpbp1 // GTP binding protein 1 // 15 E3 // 14904 /// ENSMUST0000000         | 0,0360992 | -1,21762 |
| Chd7          | NM_001081417 // Chd7 // chromodomain helicase DNA binding protein 7 // 4 A1 4 1.          | 0,0361112 | -1,20753 |
| Palmd         | NM_023245 // Palmd // palmdelphin // 3 G1 3 52.0 cM // 114301 /// ENSMUST00000004         | 0,0362327 | -1,2436  |
| Tifa          | NM_145133 // Tifa // TRAF-interacting protein with forkhead-associated domain //          | 0,0362471 | -1,21071 |
| Lypd6         | NR_033304 // Lypd6 // LY6/PLAUR domain containing 6 // 2 C1.1 // 320343 /// NM_1          | 0,0362712 | -1,23062 |
| Panx2         | NM_001002005 // Panx2 // pannexin 2 // 15E3 15 // 406218 /// ENSMUST00000077239           | 0,0362739 | -1,26834 |
| Rnf157        | NM_027258 // Rnf157 // ring finger protein 157 // 11 E2 // 217340 /// ENSMUST000          | 0,0362881 | -1,20833 |
| Nfix          | NM_001081981 // Nfix // nuclear factor I/X // 8 C1-C2 8 38.6 cM // 18032 /// NM_          | 0,036342  | -1,2812  |
| Pcdh18        | NM_130448 // Pcdh18 // protocadherin 18 // 3 C // 73173 /// ENSMUST00000035931 /          | 0,0363446 | -1,20121 |
| Sema4f        | NM_011350 // Sema4f // sema domain, immunoglobulin domain (Ig), TM domain, and s          | 0,0363478 | -1,20968 |
| Mtmr9         | NM_177594 // Mtmr9 // myotubularin related protein 9 // 14 D1 // 210376 /// ENSM          | 0,0364181 | -1,20001 |
| 2810459M11Rik | NM_001144992 // 2810459M11Rik // RIKEN cDNA 2810459M11 gene // 1 C5 // 72792 ///          | 0,0364763 | -1,23266 |
| Nup214        | NM_172268 // Nup214 // nucleoporin 214 // 2 B 2 21.3 cM // 227720 /// ENSMUST000          | 0,0365537 | -1,28305 |
| Hdac4         | NM_207225 // Hdac4 // histone deacetylase 4 // 1 D // 208727 /// BC066052 // Hda          | 0,0365666 | -1,3428  |
| Nmnat1        | NM_133435 // Nmnat1 // nicotinamide nucleotide adenyltransferase 1 // 4 E2 //             | 0,036605  | -1,21705 |
| Pbx1          | NM_183355 // Pbx1 // pre B-cell leukemia transcription factor 1 // 1 H2.3 1 88.1          | 0,0366769 | -1,2398  |
| Prosapip1     | NM_197945 // Prosapip1 // ProSAPIP1 protein // 2 F1 // 241638 /// ENSMUST00000004         | 0,0366866 | -1,22045 |
| Setd2         | NM_001081340 // Setd2 // SET domain containing 2 // 9 F2 // 235626 /// ENSMUST00          | 0,036694  | -1,25262 |
| Prdm10        | NM_001080817 // Prdm10 // PR domain containing 10 // 9 A4 // 382066 /// ENSMUST0          | 0,0367437 | -1,25809 |
| Ankhd1        | NM_175375 // Ankhd1 // ankyrin repeat and KH domain containing 1 // 18 B2-B3 //           | 0,0367703 | -1,27258 |
| Gpr137        | NM_207220 // Gpr137 // G protein-coupled receptor 137 // 19 A // 107173 /// NM_0          | 0,0367993 | -1,20671 |
| Dab1          | NM_177259 // Dab1 // disabled homolog 1 ( <i>Drosophila</i> ) // 4 C6 4 52.7 cM // 13131  | 0,0368261 | -1,27667 |
| Alg12         | NM_001142357 // Alg12 // asparagine-linked glycosylation 12 homolog (yeast, alph          | 0,0368365 | -1,20733 |
| Mbd5          | NM_029924 // Mbd5 // methyl-CpG binding domain protein 5 // 2 C1.1 // 109241 ///          | 0,0368389 | -1,21958 |

|           |                                                                                  |           |          |
|-----------|----------------------------------------------------------------------------------|-----------|----------|
| Dido1     | NM_175551 // Dido1 // death inducer-obliterator 1 // 2 H4 // 23856 /// NM_177852 | 0,0368397 | -1,2087  |
| Npnt      | NM_033525 // Npnt // nephronectin // 3 G3 // 114249 /// NM_001029836 // Npnt //  | 0,0368618 | -1,27161 |
| Grin2d    | NM_008172 // Grin2d // glutamate receptor, ionotropic, NMDA2D (epsilon 4) // 7 B | 0,0368636 | -1,30893 |
| Ubqln4    | NM_033526 // Ubqln4 // ubiquilin 4 // 3 F1 // 94232 /// ENSMUST00000008748 // Ub | 0,0369205 | -1,21755 |
| Sec16a    | NM_153125 // Sec16a // SEC16 homolog A (S. cerevisiae) // 2 A3 // 227648 /// ENS | 0,0369259 | -1,28761 |
| Gldc      | NM_138595 // Gldc // glycine decarboxylase // 19 C 19 25.0 cM // 104174 /// ENSM | 0,0369286 | -1,22007 |
| Gpr61     | NM_175470 // Gpr61 // G protein-coupled receptor 61 // 3 F2.3 // 229714 /// ENSM | 0,0369366 | -1,20333 |
| Itga6     | NM_008397 // Itga6 // integrin alpha 6 // 2 C2-C3 2 38.0 cM // 16403 /// ENSMUST | 0,0369445 | -1,23278 |
| Ptpru     | NM_001083119 // Ptpru // protein tyrosine phosphatase, receptor type, U // 4 D2. | 0,0369971 | -1,29099 |
| Pou6f2    | NM_175006 // Pou6f2 // POU domain, class 6, transcription factor 2 // 13 A2 // 2 | 0,0371467 | -1,31034 |
| Rnf19b    | NM_029219 // Rnf19b // ring finger protein 19B // 4 D2.3 // 75234 /// ENSMUST000 | 0,0371913 | -1,21351 |
| Pld1      | NM_001164056 // Pld1 // phospholipase D1 // 3 A3 3 10.5 cM // 18805 /// NM_00887 | 0,0372056 | -1,20789 |
| Pml       | NM_178087 // Pml // promyelocytic leukemia // 9 B 9 32.0 cM // 18854 /// NM_0088 | 0,0372542 | -1,2405  |
| Slc9a1    | NM_016981 // Slc9a1 // solute carrier family 9 (sodium/hydrogen exchanger), memb | 0,0373092 | -1,25124 |
| Mli5      | NM_026984 // Mli5 // myeloid/lymphoid or mixed-lineage leukemia 5 // 5 A3 // 691 | 0,0373328 | -1,22964 |
| Fnbp4     | NM_018828 // Fnbp4 // formin binding protein 4 // 2 E1 // 55935 /// ENSMUST00000 | 0,0374191 | -1,2094  |
| Stra13    | NM_016665 // Stra13 // stimulated by retinoic acid 13 // 11 E2 // 20892 /// ENSM | 0,0374481 | -1,20534 |
| Slc31a2   | NM_025286 // Slc31a2 // solute carrier family 31, member 2 // 4 B3 // 20530 ///  | 0,0375131 | -1,23533 |
| Mycn      | NM_008709 // Mycn // v-myc myelocytomatosis viral related oncogene, neuroblastom | 0,037523  | -1,24758 |
| Pcgf2     | NM_009545 // Pcgf2 // polycomb group ring finger 2 // 11 C1-C3 11 58.4 cM // 226 | 0,0375715 | -1,21249 |
| Tmtc3     | NM_001033332 // Tmtc3 // transmembrane and tetratricopeptide repeat containing 3 | 0,0375904 | -1,25646 |
| Znrf1     | NM_133206 // Znrf1 // zinc and ring finger 1 // 8 E1 // 170737 /// NM_001168621  | 0,0376537 | -1,32829 |
| Ube2o     | NM_173755 // Ube2o // ubiquitin-conjugating enzyme E2O // 11 E2 // 217342 /// EN | 0,0376762 | -1,24067 |
| Pdzd2     | NM_001081064 // Pdzd2 // PDZ domain containing 2 // 15 A2 // 68070 /// ENSMUST00 | 0,0377907 | -1,23908 |
| Syt3      | NM_016663 // Syt3 // synaptotagmin III // 7 B4 7 23.0 cM // 20981 /// NM_0011141 | 0,0378834 | -1,23087 |
| Gpr50     | NM_010340 // Gpr50 // G-protein-coupled receptor 50 // X A7.2 X 26.0 cM // 14765 | 0,0378939 | -1,32844 |
| Bmpr1a    | NM_009758 // Bmpr1a // bone morphogenetic protein receptor, type 1A // 14 B 14 1 | 0,0378967 | -1,20688 |
| Efemp1    | NM_146015 // Efemp1 // epidermal growth factor-containing fibulin-like extracell | 0,0379007 | -1,22429 |
| Tmem43    | NM_028766 // Tmem43 // transmembrane protein 43 // 6 D2 // 74122 /// ENSMUST0000 | 0,0379399 | -1,20484 |
| Gm88      | BC147714 // Gm88 // predicted gene 88 // 17 C // 224813 /// NM_001111142 // Gm88 | 0,0379851 | -1,27043 |
| Srrm1     | NM_016799 // Srrm1 // serine/arginine repetitive matrix 1 // 4 D3 // 51796 /// N | 0,0380194 | -1,20509 |
| Xpo6      | NM_028816 // Xpo6 // exportin 6 // 7 F3 // 74204 /// BC058090 // Xpo6 // exporti | 0,0380655 | -1,22728 |
| Ctbp2     | NM_009980 // Ctbp2 // C-terminal binding protein 2 // 7 F3 7 66.0 cM // 13017 // | 0,0381704 | -1,26249 |
| Tnfrsf13c | NM_028075 // Tnfrsf13c // tumor necrosis factor receptor superfamily, member 13c | 0,0381868 | -1,29102 |
| Mir505    | NR_030499 // Mir505 // microRNA 505 --- // 751545                                | 0,0382189 | -1,4391  |
| Slc16a13  | NM_172371 // Slc16a13 // solute carrier family 16 (monocarboxylic acid transport | 0,0382355 | -1,29324 |
| Notch3    | NM_008716 // Notch3 // Notch gene homolog 3 (Drosophila) // 17 B1 17 20.0 cM //  | 0,0382362 | -1,2111  |
| Scaf1     | NM_001008422 // Scaf1 // SR-related CTD-associated factor 1 // 7 B4 // 233208 // | 0,0382898 | -1,28701 |
| Vars      | NM_011690 // Vars // valyl-tRNA synthetase // 17 B1 17 19.02 cM // 22321 /// ENS | 0,0383306 | -1,20958 |
| Shisa6    | NM_001034874 // Shisa6 // shisa homolog 6 (Xenopus laevis) // 11 B3 // 380702 // | 0,0383509 | -1,47601 |
| Kat2a     | NM_001038010 // Kat2a // K(lysine) acetyltransferase 2A // 11 D 11 61.4 cM // 14 | 0,038433  | -1,29564 |
| Sdr39u1   | NM_001082975 // Sdr39u1 // short chain dehydrogenase/reductase family 39U, membe | 0,0384474 | -1,20101 |
| Zbtb33    | NM_020256 // Zbtb33 // zinc finger and BTB domain containing 33 // X A3.3 // 568 | 0,0384684 | -1,20174 |
| Kl        | NM_013823 // Kl // klotho // 5 G3 // 16591 /// ENSMUST00000078856 // Kl // kloth | 0,0384685 | -1,20124 |
| Mfsd7c    | NM_145447 // Mfsd7c // major facilitator superfamily domain containing 7C // 12  | 0,0385049 | -1,2175  |

|               |                                                                                      |           |          |
|---------------|--------------------------------------------------------------------------------------|-----------|----------|
| Efnb1         | NM_010110 // Efnb1 // ephrin B1 // X D X 37.0 cM // 13641 /// ENSMUST0000052839      | 0,0385337 | -1,23707 |
| Zfp362        | NM_001081098 // Zfp362 // zinc finger protein 362 // 4 D2.2 // 230761 /// ENSMUS     | 0,0386044 | -1,20643 |
| BC068157      | NM_207203 // BC068157 // cDNA sequence BC068157 // 8 A1.1 // 73072 /// ENSMUST00     | 0,0386667 | -1,29776 |
| Fry           | NM_172887 // Fry // furry homolog (Drosophila) // 5 G3 // 320365 /// ENSMUST0000     | 0,0387411 | -1,27552 |
| Hmcn1         | NM_001024720 // Hmcn1 // hemicentin 1 // 1 G1 // 545370 /// ENSMUST0000074783 /      | 0,0388553 | -1,22816 |
| A930038C07Rik | NM_172399 // A930038C07Rik // RIKEN cDNA A930038C07 gene // 6 C1 // 68169 /// EN     | 0,0389258 | -1,45111 |
| Bat2l2        | NM_001081290 // Bat2l2 // HLA-B associated transcript 2-like 2 // 1 H1 1 // 2265     | 0,0389348 | -1,31104 |
| Npc2          | NM_023409 // Npc2 // Niemann Pick type C2 // 12 D1 // 67963 /// ENSMUST000000216     | 0,0389459 | -1,20021 |
| Fktn          | NM_139309 // Fktn // fukutin // 4 B2 4 22.0 cM // 246179 /// AB077383 // Fktn //     | 0,0390053 | -1,22854 |
| Mfsd2a        | NM_029662 // Mfsd2a // major facilitator superfamily domain containing 2A // 4 D     | 0,0390467 | -1,23531 |
| Lims1         | NM_026148 // Lims1 // LIM and senescent cell antigen-like domains 1 // 10 B4 10      | 0,0391063 | -1,20724 |
| Ppp2r5d       | NM_009358 // Ppp2r5d // protein phosphatase 2, regulatory subunit B (B56), delta     | 0,039191  | -1,22819 |
| Dscam         | NM_031174 // Dscam // Down syndrome cell adhesion molecule // 16 C 16 70.5 cM //     | 0,0392004 | -1,2859  |
| Brd4          | NM_020508 // Brd4 // bromodomain containing 4 // 17 B1 17 20.0 cM // 57261 /// N     | 0,0392246 | -1,29949 |
| Alad          | NM_008525 // Alad // aminolevulinic acid, delta-, dehydratase // 4 B3 4 30.6 cM // 1 | 0,0392517 | -1,4333  |
| Hey2          | NM_013904 // Hey2 // hairy/enhancer-of-split related with YRPW motif 2 // 10 A4      | 0,0393841 | -1,3281  |
| Stab1         | NM_138672 // Stab1 // stabilin 1 // 14 B // 192187 /// ENSMUST0000036618 // Sta      | 0,0393944 | -1,22472 |
| Nav1          | NM_173437 // Nav1 // neuron navigator 1 // 1 E4 // 215690 /// ENSMUST0000040599      | 0,0394076 | -1,35831 |
| Cln6          | NM_011929 // Cln6 // chloride channel 6 // 4 76.4 cM // 26372 /// ENSMUST000000      | 0,0394855 | -1,30654 |
| Ppp1r16b      | NM_153089 // Ppp1r16b // protein phosphatase 1, regulatory (inhibitor) subunit 1     | 0,0395239 | -1,31634 |
| Syncrip       | NM_019796 // Syncrip // synaptotagmin binding, cytoplasmic RNA interacting prote     | 0,0395499 | -1,20316 |
| Kcnh6         | NM_001037712 // Kcnh6 // potassium voltage-gated channel, subfamily H (eag-relat     | 0,039581  | -1,22416 |
| Csdc2         | NM_145473 // Csdc2 // cold shock domain containing C2, RNA binding // 15 E1 // 1     | 0,039583  | -1,40842 |
| Fmod          | NM_021355 // Fmod // fibromodulin // 1 E4 1 74.3 cM // 14264 /// ENSMUST000000048    | 0,0396122 | -1,33587 |
| Cbfa2t2       | NM_172860 // Cbfa2t2 // core-binding factor, runt domain, alpha subunit 2, trans     | 0,0396126 | -1,20596 |
| Pura          | NM_008989 // Pura // purine rich element binding protein A // 18 B3 // 19290 ///     | 0,0396274 | -1,22698 |
| Nt5dc3        | NM_175331 // Nt5dc3 // 5'-nucleotidase domain containing 3 // 10 C1 // 103466 //     | 0,0396803 | -1,21387 |
| Grid1         | NM_008166 // Grid1 // glutamate receptor, ionotropic, delta 1 // 14 B 14 13.5 cM     | 0,0397469 | -1,25371 |
| Olf1444       | NM_146702 // Olf1444 // olfactory receptor 1444 // --- // 258697 /// ENSMUST000      | 0,0397528 | -1,26803 |
| Gse1          | NM_198671 // Gse1 // genetic suppressor element 1 // 8 E1 // 382034 /// NM_00114     | 0,0397552 | -1,23946 |
| Alg3          | NM_145939 // Alg3 // asparagine-linked glycosylation 3 homolog (yeast, alpha-1,3     | 0,0397811 | -1,23341 |
| Tgfa          | NM_031199 // Tgfa // transforming growth factor alpha // 6 D 6 35.8 cM // 21802      | 0,0397831 | -1,22926 |
| Cdc26         | NM_139291 // Cdc26 // cell division cycle 26 // 4 B3 // 66440 /// BC005775 // Cd     | 0,0397987 | -1,21244 |
| Nacc1         | NM_025788 // Nacc1 // nucleus accumbens associated 1, BEN and BTB (POZ) domain c     | 0,03981   | -1,2785  |
| Slco3a1       | NM_023908 // Slco3a1 // solute carrier organic anion transporter family, member      | 0,0399597 | -1,30522 |
| Ankrd13b      | NM_172945 // Ankrd13b // ankyrin repeat domain 13b // 11 B5 // 268445 /// ENSMUS     | 0,0400608 | -1,20487 |
| Huwe1         | NM_021523 // Huwe1 // HECT, UBA and WWE domain containing 1 // X F3 // 59026 ///     | 0,0400868 | -1,21778 |
| Phlpp2        | NM_001122594 // Phlpp2 // PH domain and leucine rich repeat protein phosphatase      | 0,0401943 | -1,21724 |
| Prkx          | NM_016979 // Prkx // protein kinase, X-linked // X A7.3 // 19108 /// ENSMUST0000     | 0,0402036 | -1,29374 |
| Prl2c1        | NM_001045532 // Prl2c1 // Prolactin family 2, subfamily c, member 1 // 13 A3.1 /     | 0,0402139 | -1,20386 |
| Cul7          | NM_025611 // Cul7 // cullin 7 // 17 C // 66515 /// ENSMUST0000043464 // Cul7 //      | 0,0402584 | -1,24307 |
| Emx2          | NM_010132 // Emx2 // empty spiracles homolog 2 (Drosophila) // 19 D3 19 53.5 cM      | 0,0403117 | -1,21296 |
| Gm9982        | ENSMUST00000069568 // Gm9982 // predicted gene 9982 // --- // 791357                 | 0,0403203 | -1,30502 |
| Pelp1         | NM_029231 // Pelp1 // proline, glutamic acid and leucine rich protein 1 // 11 B3     | 0,0403373 | -1,21546 |
| Purb          | NM_011221 // Purb // purine rich element binding protein B // 11 A1 11 3.0 cM //     | 0,0405142 | -1,20004 |

|               |                                                                                               |           |          |
|---------------|-----------------------------------------------------------------------------------------------|-----------|----------|
| Atp7a         | NM_001109757 // Atp7a // ATPase, Cu <sup>++</sup> transporting, alpha polypeptide // X D X 4  | 0,0405403 | -1,2288  |
| Zcchc7        | NM_138590 // Zcchc7 // zinc finger, CCHC domain containing 7 // 4 B1 // 319885 /              | 0,040592  | -1,2722  |
| Slc45a1       | NM_173774 // Slc45a1 // solute carrier family 45, member 1 // 4 E2 // 242773 //               | 0,0406141 | -1,20168 |
| Trappc9       | NM_180662 // Trappc9 // trafficking protein particle complex 9 // 15 D3 // 76510              | 0,0407367 | -1,21389 |
| Jhdm1d        | NM_001033430 // Jhdm1d // jumonji C domain-containing histone demethylase 1 homo              | 0,0407501 | -1,26011 |
| Rgs3          | NM_134257 // Rgs3 // regulator of G-protein signaling 3 // 4 B3 4 35.0 cM // 507              | 0,0408126 | -1,24632 |
| Cpsf6         | NM_001013391 // Cpsf6 // cleavage and polyadenylation specific factor 6 // 10 D2              | 0,0409107 | -1,25542 |
| Gcn111        | NM_172719 // Gcn111 // GCN1 general control of amino-acid synthesis 1-like 1 (ye              | 0,0409123 | -1,26231 |
| Tanc2         | NM_181071 // Tanc2 // tetratricopeptide repeat, ankyrin repeat and coiled-coil c              | 0,0409191 | -1,28173 |
| Crybg3        | NM_174848 // Crybg3 // beta-gamma crystallin domain containing 3 // 16 C1.3 // 2              | 0,0409672 | -1,26233 |
| Itga4         | NM_010576 // Itga4 // integrin alpha 4 // 2 C3 2 46.0 cM // 16401 // AF109136 /               | 0,0409896 | -1,22458 |
| Vps37c        | NM_181403 // Vps37c // vacuolar protein sorting 37C (yeast) // 19 A // 107305 //              | 0,0409911 | -1,20056 |
| Ptprn         | NM_008985 // Ptprn // protein tyrosine phosphatase, receptor type, N // 1 C3 1 4              | 0,0410886 | -1,24102 |
| Rasl10b       | NM_001013386 // Rasl10b // RAS-like, family 10, member B // 11 C // 276952 // E               | 0,0411058 | -1,36324 |
| Mkks          | NM_021527 // Mkks // McKusick-Kaufman syndrome protein // 2 F3 // 59030 // NM_0               | 0,0411125 | -1,21499 |
| Cnih2         | NM_009920 // Cnih2 // cornichon homolog 2 (Drosophila) // 19 A // 12794 // ENSM               | 0,041143  | -1,26164 |
| Mxra7         | NM_026280 // Mxra7 // matrix-remodelling associated 7 // 11 E2 // 67622 // ENSM               | 0,041174  | -1,2492  |
| 3110057O12Rik | BC145212 // 3110057O12Rik // RIKEN cDNA 3110057O12 gene --- // 269423 // NM_                  | 0,0412115 | -1,22804 |
| Usp32         | NM_001029934 // Usp32 // ubiquitin specific peptidase 32 // 11 C // 237898 // E               | 0,0412133 | -1,20522 |
| Ryr2          | NM_023868 // Ryr2 // ryanodine receptor 2, cardiac // 13 A1-A2 13 7.0 cM // 2019              | 0,0412315 | -1,20484 |
| Zfp668        | NM_146259 // Zfp668 // zinc finger protein 668 // 7 F3 // 244219 // ENSMUST0000               | 0,0412513 | -1,22444 |
| Rnf182        | NM_183204 // Rnf182 // ring finger protein 182 // 13 A4 // 328234 // ENSMUST000               | 0,0412781 | -1,21921 |
| Phgdh         | NM_016966 // Phgdh // 3-phosphoglycerate dehydrogenase // 3 E1 // 236539 // ENS               | 0,0412912 | -1,20752 |
| Usp2          | NM_198092 // Usp2 // ubiquitin specific peptidase 2 // 9 B // 53376 // NM_01680               | 0,0413813 | -1,23425 |
| Slc15a2       | NM_021301 // Slc15a2 // solute carrier family 15 (H <sup>+</sup> /peptide transporter), membe | 0,0414214 | -1,21114 |
| Nfib          | NM_001113209 // Nfib // nuclear factor I/B // 4 C4-C6 4 38.6 cM // 18028 // NM_               | 0,0414888 | -1,20961 |
| Zdhhc16       | NM_023740 // Zdhhc16 // zinc finger, DHHC domain containing 16 // 19 D1 // 74168              | 0,0415656 | -1,24962 |
| Zfp598        | NM_183149 // Zfp598 // zinc finger protein 598 // 17 A3.3 // 213753 // ENSMUST0               | 0,0415677 | -1,20742 |
| Rnf165        | NM_001164504 // Rnf165 // ring finger protein 165 // 18 E3 // 225743 // ENSMUST               | 0,0415978 | -1,44421 |
| Cpt1c         | NM_153679 // Cpt1c // carnitine palmitoyltransferase 1c // 7 B2 // 78070 // ENS               | 0,0416168 | -1,21004 |
| Ndst2         | NM_010811 // Ndst2 // N-deacetylase/N-sulfotransferase (heparan glucosaminyl) 2               | 0,0416653 | -1,21396 |
| Celsr1        | NM_009886 // Celsr1 // cadherin, EGF LAG seven-pass G-type receptor 1 (flamingo               | 0,0417006 | -1,23987 |
| Med1          | NM_013634 // Med1 // mediator complex subunit 1 // 11 D 11 61.0 cM // 19014 //                | 0,0417088 | -1,21299 |
| Smarcal1      | NM_018817 // Smarcal1 // SWI/SNF related matrix associated, actin dependent regu              | 0,041737  | -1,23566 |
| Nhs           | NM_001081052 // Nhs // Nance-Horan syndrome (human) // X F4 X 68.0 cM // 195727               | 0,0417442 | -1,23538 |
| Dnmbp         | NM_028029 // Dnmbp // dynamin binding protein // 19 D1 // 71972 // ENSMUST00000               | 0,0417968 | -1,27675 |
| Nsun3         | NM_178925 // Nsun3 // NOL1/NOP2/Sun domain family member 3 // 16 C1.3 // 106338               | 0,0418106 | -1,21158 |
| Mdga2         | NM_207010 // Mdga2 // MAM domain containing glycosylphosphatidylinositol anchor               | 0,041863  | -1,24051 |
| Neto1         | NM_144946 // Neto1 // neuropilin (NRP) and tollid (TLL)-like 1 // 18 E4 // 2463               | 0,0418669 | -1,26731 |
| Alk           | NM_007439 // Alk // anaplastic lymphoma kinase // 17 E1.3 17 50.0 cM // 11682 //              | 0,0419264 | -1,23607 |
| Slc32a1       | NM_009508 // Slc32a1 // solute carrier family 32 (GABA vesicular transporter), m              | 0,0419934 | -1,24324 |
| Gm5567        | NM_001004182 // Gm5567 // predicted gene 5567 // 6 B1 6 // 434008 // ENSMUST000               | 0,0419961 | -1,24301 |
| Xkr4          | NM_001011874 // Xkr4 // X Kell blood group precursor related family member 4 //               | 0,0420111 | -1,21055 |
| Igf2          | NM_001122737 // Igf2 // insulin-like growth factor 2 // 7 F5 7 69.09 cM // 16002              | 0,0420767 | -1,35835 |
| Sp2           | NM_030220 // Sp2 // Sp2 transcription factor // 11 D // 78912 // NM_001080964 /               | 0,0421022 | -1,22497 |

|               |                                                                                   |           |          |
|---------------|-----------------------------------------------------------------------------------|-----------|----------|
| Slc6a11       | NM_172890 // Slc6a11 // solute carrier family 6 (neurotransmitter transporter, G  | 0,0421272 | -1,40781 |
| Dgkz          | NM_001166597 // Dgkz // diacylglycerol kinase zeta // 2 E1 // 104418 /// NM_1383  | 0,042147  | -1,26491 |
| Ncapd3        | NM_178113 // Ncapd3 // non-SMC condensin II complex, subunit D3 // 9 A4 // 78658  | 0,0422088 | -1,21748 |
| Ube3b         | NM_054093 // Ube3b // ubiquitin protein ligase E3B // 5 F // 117146 /// ENSMUST0  | 0,0422204 | -1,20677 |
| Pion          | NM_175437 // Pion // pigeon homolog (Drosophila) // 5 A3 // 212167 /// ENSMUST000 | 0,0422724 | -1,23098 |
| Pabpc6        | NM_001163836 // Pabpc6 // poly(A) binding protein, cytoplasmic 6 // 17 A1 // 675  | 0,0423165 | -1,25897 |
| Diap2         | NM_017398 // Diap2 // diaphanous homolog 2 (Drosophila) // X E3 // 54004 /// NM_  | 0,0423208 | -1,30133 |
| Nlgn2         | NM_198862 // Nlgn2 // neuroligin 2 // 11 B3 // 216856 /// ENSMUST00000056484 //   | 0,0423797 | -1,37108 |
| Slc1a3        | NM_148938 // Slc1a3 // solute carrier family 1 (glial high affinity glutamate tr  | 0,0424479 | -1,27487 |
| Rbms3         | NM_001172123 // Rbms3 // RNA binding motif, single stranded interacting protein   | 0,0424882 | -1,22501 |
| Tmem86b       | NM_023440 // Tmem86b // transmembrane protein 86B // 7 A1 // 68255 /// ENSMUST00  | 0,0424966 | -1,25317 |
| Gm15800       | ENSMUST00000065641 // Gm15800 // predicted gene 15800 // 5 F // 269700 /// ENSMU  | 0,0425315 | -1,24909 |
| Abca2         | NM_007379 // Abca2 // ATP-binding cassette, sub-family A (ABC1), member 2 // 2 A  | 0,0425361 | -1,33165 |
| Slc25a23      | NM_025877 // Slc25a23 // solute carrier family 25 (mitochondrial carrier; phosph  | 0,0425488 | -1,31338 |
| Otud6b        | NM_152812 // Otud6b // OTU domain containing 6B // 4 A1 // 72201 /// ENSMUST0000  | 0,0425531 | -1,24813 |
| Alpk1         | NM_027808 // Alpk1 // alpha-kinase 1 // 3 H1 // 71481 /// ENSMUST00000029662 //   | 0,0426016 | -1,20874 |
| Nek6          | NM_021606 // Nek6 // NIMA (never in mitosis gene a)-related expressed kinase 6 /  | 0,0426281 | -1,22705 |
| Pcnx          | NM_018814 // Pcnx // pecanex homolog (Drosophila) // 12 D1 // 54604 /// ENSMUST0  | 0,0426777 | -1,24214 |
| Mpp2          | NM_016695 // Mpp2 // membrane protein, palmitoylated 2 (MAGUK p55 subfamily memb  | 0,0426918 | -1,25733 |
| Arhgap33      | NM_178252 // Arhgap33 // Rho GTPase activating protein 33 // 7 B1 // 233071 ///   | 0,0427529 | -1,33459 |
| Plekhm2       | NM_001033150 // Plekhm2 // pleckstrin homology domain containing, family M (with  | 0,0428075 | -1,21807 |
| Ern1          | NM_023913 // Ern1 // endoplasmic reticulum (ER) to nucleus signalling 1 // 11 E1  | 0,0428332 | -1,24528 |
| Pard3         | NM_033620 // Pard3 // par-3 (partitioning defective 3) homolog (C. elegans) // 8  | 0,042837  | -1,20279 |
| Sema3f        | NM_011349 // Sema3f // sema domain, immunoglobulin domain (Ig), short basic doma  | 0,042896  | -1,23283 |
| Szt2          | NM_198170 // Szt2 // seizure threshold 2 // 4 D2.1 // 230676 /// ENSMUST000000075 | 0,0429324 | -1,31433 |
| Insr          | NM_010568 // Insr // insulin receptor // 8 A1.1]8 1.0 cM // 16337 /// ENSMUST000  | 0,0429501 | -1,23056 |
| Atxn711       | NM_028139 // Atxn711 // ataxin 7-like 1 // 12 A3 // 380753 /// ENSMUST0000011082  | 0,0430468 | -1,26533 |
| Arf6          | NM_007481 // Arf6 // ADP-ribosylation factor 6 // 12 C2 // 11845 /// ENSMUST0000  | 0,0430808 | -1,21108 |
| Hspb8         | NM_030704 // Hspb8 // heat shock protein 8 // 5 F]5 59.0 cM // 80888 /// ENSMUST  | 0,043104  | -1,31098 |
| Smg5          | NM_178246 // Smg5 // Smg-5 homolog, nonsense mediated mRNA decay factor (C. eleg  | 0,0431421 | -1,23602 |
| Dync111       | NM_010063 // Dync111 // dynein cytoplasmic 1 intermediate chain 1 // 6 A1]6 3.8   | 0,0431795 | -1,21156 |
| 9130011E15Rik | NM_198296 // 9130011E15Rik // RIKEN cDNA 9130011E15 gene // 19 C3 // 71617 /// E  | 0,0431863 | -1,2103  |
| Slc7a1        | NM_007513 // Slc7a1 // solute carrier family 7 (cationic amino acid transporter,  | 0,0432475 | -1,24908 |
| Fam20a        | NM_153782 // Fam20a // family with sequence similarity 20, member A // 11 E1 //   | 0,0432656 | -1,21342 |
| Asap2         | NM_001135192 // Asap2 // ArfGAP with SH3 domain, ankyrin repeat and PH domain 2   | 0,0432766 | -1,26298 |
| Nek9          | NM_145138 // Nek9 // NIMA (never in mitosis gene a)-related expressed kinase 9 /  | 0,0432888 | -1,22568 |
| Brpf3         | NM_001081315 // Brpf3 // bromodomain and PHD finger containing, 3 // 17 A3.3 //   | 0,0433205 | -1,31357 |
| Per1          | NM_001159367 // Per1 // period homolog 1 (Drosophila) // 11 B // 18626 /// NM_01  | 0,0433428 | -1,24552 |
| Neur1B        | NM_001081656 // Neur1B // neuralized homolog 1B (Drosophila) // 17 A3.3]17 // 2   | 0,0434563 | -1,21077 |
| Mpped2        | NM_029837 // Mpped2 // metallophosphoesterase domain containing 2 // 2 E3]2 59.0  | 0,0434708 | -1,21823 |
| Mlec          | NM_175403 // Mlec // malectin // 5 F]5 60.0 cM // 109154 /// ENSMUST00000112121   | 0,0435965 | -1,294   |
| Nipa1         | NM_153578 // Nipa1 // non imprinted in Prader-Willi/Angelman syndrome 1 homolog   | 0,0436068 | -1,20644 |
| Mrgpre        | NM_175534 // Mrgpre // MAS-related GPR, member E // 7 F5 // 244238 /// ENSMUST00  | 0,0437792 | -1,22447 |
| Cdc42ep3      | NM_026514 // Cdc42ep3 // CDC42 effector protein (Rho GTPase binding) 3 // 17 E3   | 0,0438214 | -1,23533 |
| Vstm2l        | NM_198627 // Vstm2l // V-set and transmembrane domain containing 2-like // 2 H1   | 0,0438807 | -1,241   |



|          |                                                                                   |           |          |
|----------|-----------------------------------------------------------------------------------|-----------|----------|
| Fmn1     | NM_010230 // Fmn1 // formin 1 // 2 C1-qtter 2 65.0 cM // 14260 /// NM_001043322 / | 0,0438855 | -1,25204 |
| Igsf3    | NM_207205 // Igsf3 // immunoglobulin superfamily, member 3 // 3 F2.2 3 48.5 cM /  | 0,0438856 | -1,26568 |
| Tom1     | NM_011622 // Tom1 // target of myb1 homolog (chicken) // 8 C1 // 21968 /// NM_00  | 0,0438953 | -1,20944 |
| Mef2d    | NM_133665 // Mef2d // myocyte enhancer factor 2D // 3 F1 3 43.0 cM // 17261 ///   | 0,0439247 | -1,25874 |
| Grm4     | NM_001013385 // Grm4 // glutamate receptor, metabotropic 4 // 17 A3.3 // 268934   | 0,043926  | -1,39885 |
| Msl1     | NM_028722 // Msl1 // male-specific lethal 1 homolog (Drosophila) // 11 D // 7402  | 0,043985  | -1,21119 |
| Megf8    | NM_001160400 // Megf8 // multiple EGF-like-domains 8 // 7 A3 // 269878 /// ENSMU  | 0,0439875 | -1,30914 |
| Mamld1   | NM_001081354 // Mamld1 // mastermind-like domain containing 1 // X A7.2 // 33363  | 0,0440207 | -1,21302 |
| Lrrn3    | NM_010733 // Lrrn3 // leucine rich repeat protein 3, neuronal // 12 B3 // 16981   | 0,0440495 | -1,20648 |
| Orai2    | NM_178751 // Orai2 // ORAI calcium release-activated calcium modulator 2 // 5 G2  | 0,0440816 | -1,24557 |
| Kpna6    | NM_008468 // Kpna6 // karyopherin (importin) alpha 6 // 4 D2.3 // 16650 /// ENSM  | 0,0440861 | -1,21057 |
| Gabrb3   | NM_008071 // Gabrb3 // gamma-aminobutyric acid (GABA) A receptor, subunit beta 3  | 0,0440901 | -1,23707 |
| Pdzd8    | NM_001033222 // Pdzd8 // PDZ domain containing 8 // 19 D3 // 107368 /// ENSMUST0  | 0,0441653 | -1,21874 |
| Commd9   | NM_029635 // Commd9 // COMM domain containing 9 // 2 E2 // 76501 /// ENSMUST0000  | 0,0442    | -1,22291 |
| Arsb     | NM_009712 // Arsb // arylsulfatase B // 13 C3-D1 13 50.0 cM // 11881 /// ENSMUST  | 0,0442158 | -1,27044 |
| Pkd1     | NM_013630 // Pkd1 // polycystic kidney disease 1 homolog // 17 A3.3 17 10.4 cM /  | 0,0442435 | -1,31522 |
| Mast3    | NM_199308 // Mast3 // microtubule associated serine/threonine kinase 3 // 8 B3.3  | 0,044246  | -1,22513 |
| Hivep2   | NM_010437 // Hivep2 // human immunodeficiency virus type I enhancer binding prot  | 0,0442551 | -1,22381 |
| Scn3a    | NM_018732 // Scn3a // sodium channel, voltage-gated, type III, alpha // 2 C1.3 2  | 0,0442923 | -1,21258 |
| Rbm14    | NM_019869 // Rbm14 // RNA binding motif protein 14 // 19 A // 56275 /// ENSMUST0  | 0,0443255 | -1,36169 |
| Scn3b    | NM_178227 // Scn3b // sodium channel, voltage-gated, type III, beta // 9 A5.1 //  | 0,044349  | -1,22797 |
| Gm10305  | ENSMUST00000094956 // Gm10305 // predicted gene 10305 --- // 100038722            | 0,0444515 | -1,23409 |
| Atxn7l2  | ENSMUST00000102633 // Atxn7l2 // ataxin 7-like 2 // 3 F2.3 // 72522 /// ENSMUST0  | 0,0444659 | -1,20975 |
| Hcfc1    | NM_008224 // Hcfc1 // host cell factor C1 // X C1 X 29.54 cM // 15161 /// ENSMUS  | 0,0445165 | -1,32237 |
| Dip2c    | NM_001081426 // Dip2c // DIP2 disco-interacting protein 2 homolog C (Drosophila)  | 0,0446662 | -1,29451 |
| Rbm25    | NM_027349 // Rbm25 // RNA binding motif protein 25 // 12 D1 // 67039 /// ENSMUST  | 0,0446663 | -1,21628 |
| Slc9a3r2 | NM_023055 // Slc9a3r2 // solute carrier family 9 (sodium/hydrogen exchanger), me  | 0,0446697 | -1,28572 |
| Zc3h3    | NM_172121 // Zc3h3 // zinc finger CCCH type containing 3 // 15 D3 // 223642 ///   | 0,0447553 | -1,22787 |
| Serpinf1 | NM_011340 // Serpinf1 // serine (or cysteine) peptidase inhibitor, clade F, memb  | 0,0447568 | -1,2172  |
| Ap2a1    | NM_007458 // Ap2a1 // adaptor protein complex AP-2, alpha 1 subunit // 7 B2 // 1  | 0,0448839 | -1,22049 |
| Mmd2     | NM_175217 // Mmd2 // monocyte to macrophage differentiation-associated 2 // 5 G2  | 0,0449659 | -1,21948 |
| Timp4    | NM_080639 // Timp4 // tissue inhibitor of metalloproteinase 4 // 6 E3 6 46.0 cM   | 0,0450325 | -1,29109 |
| Taf1d    | BC110660 // Taf1d // TATA box binding protein (Tbp)-associated factor, RNA polym  | 0,0451132 | -1,20875 |
| Fam38a   | NM_001037298 // Fam38a // family with sequence similarity 38, member A // 8 E1 /  | 0,0451351 | -1,27241 |
| Galnt6   | NM_175032 // Galnt6 // UDP-N-acetyl-alpha-D-galactosamine:polypeptide N-acetylgl  | 0,0452166 | -1,22296 |
| Gprc5b   | NM_022420 // Gprc5b // G protein-coupled receptor, family C, group 5, member B /  | 0,0452455 | -1,34396 |
| Crtc3    | NM_173863 // Crtc3 // CREB regulated transcription coactivator 3 // 7 D3 // 7046  | 0,0453417 | -1,28927 |
| Smchd1   | NM_028887 // Smchd1 // SMC hinge domain containing 1 // 17 E1.3 // 74355 /// ENS  | 0,0453842 | -1,20069 |
| Slco2b1  | NM_175316 // Slco2b1 // solute carrier organic anion transporter family, member   | 0,0454469 | -1,23786 |
| Cdh19    | NM_001081386 // Cdh19 // cadherin 19, type 2 // 1 E2.1 // 227485 /// ENSMUST0000  | 0,0455134 | -1,27538 |
| Def8     | NM_054046 // Def8 // differentially expressed in FDCP 8 // 8 E1 8 67.0 cM // 238  | 0,0455445 | -1,20877 |
| Prex1    | NM_177782 // Prex1 // phosphatidylinositol-3,4,5-trisphosphate-dependent Rac exc  | 0,0455705 | -1,25003 |
| Arhgef10 | NM_172751 // Arhgef10 // Rho guanine nucleotide exchange factor (GEF) 10 // 8 A1  | 0,0455798 | -1,219   |
| Szt2     | NM_198170 // Szt2 // seizure threshold 2 // 4 D2.1 // 230676 /// ENSMUST00000075  | 0,0456516 | -1,34458 |
| Cdkn1b   | NM_009875 // Cdkn1b // cyclin-dependent kinase inhibitor 1B // 6 G1 6 62.0 cM //  | 0,0457136 | -1,20414 |

|               |                                                                                  |           |          |
|---------------|----------------------------------------------------------------------------------|-----------|----------|
| Lrrc8b        | NM_001033550 // Lrrc8b // leucine rich repeat containing 8 family, member B // 5 | 0,0457202 | -1,21541 |
| C030046E11Rik | NM_001081319 // C030046E11Rik // RIKEN cDNA C030046E11 gene // 19 C1 // 226089 / | 0,0457601 | -1,22458 |
| B3gat3        | NM_024256 // B3gat3 // beta-1,3-glucuronyltransferase 3 (glucuronosyltransferase | 0,0457881 | -1,23073 |
| Alx4          | NM_007442 // Alx4 // aristaless-like homeobox 4 // 2 E1 2 52.0 cM // 11695 // E  | 0,0459707 | -1,25443 |
| Tnrc6c        | NM_198022 // Tnrc6c // trinucleotide repeat containing 6C // 11 E2 // 217351 //  | 0,0459813 | -1,26213 |
| Fkbp10        | NM_010221 // Fkbp10 // FK506 binding protein 10 // 11 D 11 58.0 cM // 14230 //   | 0,0460001 | -1,20287 |
| Abcg4         | NM_138955 // Abcg4 // ATP-binding cassette, sub-family G (WHITE), member 4 // 9  | 0,0460264 | -1,24589 |
| Cep350        | NM_001039184 // Cep350 // centrosomal protein 350 // 1 G3 // 74081               | 0,0460352 | -1,28423 |
| Gcnt1         | NM_173442 // Gcnt1 // glucosaminyl (N-acetyl) transferase 1, core 2 // 19 B 19 1 | 0,0460542 | -1,33831 |
| Spata2        | NM_170756 // Spata2 // spermatogenesis associated 2 // 2 H3 // 263876 // ENSMUS  | 0,0460688 | -1,21753 |
| Btdb3         | NM_145534 // Btdb3 // BTB (POZ) domain containing 3 // 2 F3 // 228662 // NM_001  | 0,0460896 | -1,22382 |
| Arhgef17      | NM_001081116 // Arhgef17 // Rho guanine nucleotide exchange factor (GEF) 17 // 7 | 0,0461399 | -1,34157 |
| Plcb3         | NM_008874 // Plcb3 // phospholipase C, beta 3 // 19 B 19 2.5 cM // 18797 // ENS  | 0,0461441 | -1,2561  |
| Adamts10      | NM_172619 // Adamts10 // a disintegrin-like and metallopeptidase (reprolysin typ | 0,0461484 | -1,2529  |
| Wdr46         | NM_020603 // Wdr46 // WD repeat domain 46 // 17 B1 // 57315 // ENSMUST000000251  | 0,046205  | -1,30374 |
| Cd164         | NM_016898 // Cd164 // CD164 antigen // 10 B2 10 25.0 cM // 53599 // ENSMUST0000  | 0,0462173 | -1,21023 |
| 1600012F09Rik | NM_025904 // 1600012F09Rik // RIKEN cDNA 1600012F09 gene // 13 A2-A3 // 67008 // | 0,0462945 | -1,22138 |
| 1600012F09Rik | NM_025904 // 1600012F09Rik // RIKEN cDNA 1600012F09 gene // 13 A2-A3 // 67008 // | 0,0462948 | -1,22138 |
| Rbms1         | NM_001141932 // Rbms1 // RNA binding motif, single stranded interacting protein  | 0,0463095 | -1,22694 |
| 4933426M11Rik | BC040401 // 4933426M11Rik // RIKEN cDNA 4933426M11 gene // 12 D1 // 217684 // E  | 0,0463433 | -1,20044 |
| Cecr2         | NM_001128151 // Cecr2 // cat eye syndrome chromosome region, candidate 2 homolog | 0,0464503 | -1,26928 |
| Ppp1r3f       | NM_138605 // Ppp1r3f // protein phosphatase 1, regulatory (inhibitor) subunit 3F | 0,0464533 | -1,2171  |
| Ldoc1l        | NM_177630 // Ldoc1l // leucine zipper, down-regulated in cancer 1-like // 15 E2  | 0,0465088 | -1,21312 |
| Fbxw2         | NM_013890 // Fbxw2 // F-box and WD-40 domain protein 2 // 2 B // 30050 // NM_00  | 0,0465173 | -1,21365 |
| Fam38a        | NM_001037298 // Fam38a // family with sequence similarity 38, member A // 8 E1 / | 0,0465202 | -1,27179 |
| Gm2382        | NM_001128601 // Gm2382 // predicted gene 2382 // 9 E3.1 9 // 100039707 // NM_02  | 0,0465654 | -1,20345 |
| Dact3         | NM_001081655 // Dact3 // dapper homolog 3, antagonist of beta-catenin (xenopus)  | 0,0465825 | -1,2148  |
| Ppm1e         | NM_177167 // Ppm1e // protein phosphatase 1E (PP2C domain containing) // 11 C // | 0,0466532 | -1,23314 |
| Syne2         | NM_001005510 // Syne2 // synaptic nuclear envelope 2 // 12 C3 // 319565          | 0,0467237 | -1,20597 |
| Rny1          | NR_004419 // Rny1 // RNA, Y1 small cytoplasmic, Ro-associated // 6 6 54.3 cM //  | 0,0467492 | -1,47294 |
| 0610007P08Rik | NM_001013608 // 0610007P08Rik // RIKEN cDNA 0610007P08 gene // 13 B3 // 76251 // | 0,0467539 | -1,20264 |
| Cacna1c       | NM_001159533 // Cacna1c // calcium channel, voltage-dependent, L type, alpha 1C  | 0,0468701 | -1,316   |
| Nr1d1         | NM_145434 // Nr1d1 // nuclear receptor subfamily 1, group D, member 1 // 11 D // | 0,0469086 | -1,23903 |
| Pnkd          | NM_001039509 // Pnkd // paroxysmal nonkinesigenic dyskinesia // 1 C3 // 56695 /  | 0,0469497 | -1,2009  |
| Fam193a       | BC099925 // Fam193a // family with sequence similarity 193, member A // 5 B2 //  | 0,0470656 | -1,33542 |
| Ptpn21        | NM_011877 // Ptpn21 // protein tyrosine phosphatase, non-receptor type 21 // 12  | 0,0471043 | -1,21995 |
| Dnajc13       | NM_001163026 // Dnajc13 // DnaJ (Hsp40) homolog, subfamily C, member 13 // 9 F1  | 0,0471261 | -1,43387 |
| Mfge8         | NM_008594 // Mfge8 // milk fat globule-EGF factor 8 protein // 7 D3 7 41.2 cM // | 0,0472184 | -1,20344 |
| Cops8         | NM_133805 // Cops8 // COP9 (constitutive photomorphogenic) homolog, subunit 8 (A | 0,0472277 | -1,21061 |
| Pqlc2         | NM_145384 // Pqlc2 // PQ loop repeat containing 2 // 4 D3 // 212555 // ENSMUST0  | 0,0472932 | -1,20983 |
| Scrib         | NM_134089 // Scrib // scribbled homolog (Drosophila) // 15 D3 15 43.8 cM // 1057 | 0,0473016 | -1,22895 |
| Lyst          | NM_010748 // Lyst // lysosomal trafficking regulator // 13 A1 13 7.0 cM // 17101 | 0,0473749 | -1,21762 |
| 1810041L15Rik | NM_001163145 // 1810041L15Rik // RIKEN cDNA 1810041L15 gene // 15 E2 // 72301 // | 0,0473785 | -1,21133 |
| Rfxank        | NM_011266 // Rfxank // regulatory factor X-associated ankyrin-containing protein | 0,0473935 | -1,24189 |
| Calcoco1      | NM_026192 // Calcoco1 // calcium binding and coiled coil domain 1 // 15 F3 15 // | 0,0474007 | -1,26014 |

|               |                                                                                    |           |          |
|---------------|------------------------------------------------------------------------------------|-----------|----------|
| Pvr1          | NM_021424 // Pvr1 // poliovirus receptor-related 1 // 9 B // 58235 /// ENSMUST0    | 0,0474452 | -1,27902 |
| Hmcn1         | NM_001024720 // Hmcn1 // hemicentin 1 // 1 G1 // 545370 /// ENSMUST00000074783 /   | 0,047465  | -1,24932 |
| Phlpp1        | NM_133821 // Phlpp1 // PH domain and leucine rich repeat protein phosphatase 1 /   | 0,0475263 | -1,24927 |
| Gpr165        | NM_029536 // Gpr165 // G protein-coupled receptor 165 // X C1 X // 76206 /// ENS   | 0,0476257 | -1,23499 |
| BC018242      | NM_144935 // BC018242 // cDNA sequence BC018242 // 9 A3 // 235044 /// AY438023 /   | 0,0477462 | -1,2103  |
| Tet1          | NM_027384 // Tet1 // tet oncogene 1 // 10 B4 10 32.0 cM // 52463 /// ENSMUST0000   | 0,0477464 | -1,26287 |
| C1ql1         | NM_011795 // C1ql1 // complement component 1, q subcomponent-like 1 // 11 D // 2   | 0,0477659 | -1,29441 |
| Wscd1         | NM_177618 // Wscd1 // WSC domain containing 1 // 11 B4 // 216881 /// ENSMUST0000   | 0,0477663 | -1,23747 |
| Snap23        | NM_001177792 // Snap23 // synaptosomal-associated protein 23 // 2 E5 2 61.8 cM /   | 0,0477699 | -1,36532 |
| Slc29a2       | NM_007854 // Slc29a2 // solute carrier family 29 (nucleoside transporters), memb   | 0,0480769 | -1,21714 |
| Chmp1a        | NM_145606 // Chmp1a // chromatin modifying protein 1A // 8 E1 // 234852 /// ENSM   | 0,0480802 | -1,22397 |
| Mtus2         | NM_029920 // Mtus2 // microtubule associated tumor suppressor candidate 2 // 5 G   | 0,0481165 | -1,20401 |
| Cacna1i       | NM_001044308 // Cacna1i // calcium channel, voltage-dependent, alpha 1i subunit    | 0,0481459 | -1,37039 |
| Dcald         | NM_026551 // Dcald // dephospho-CoA kinase domain containing // 11 E1 // 68087 /   | 0,048203  | -1,25405 |
| Pla2g16       | NM_139269 // Pla2g16 // phospholipase A2, group XVI // 19 A // 225845 /// ENSMUS   | 0,0482354 | -1,24323 |
| Rassf8        | ENSMUST00000111704 // Rassf8 // Ras association (RalGDS/AF-6) domain family (N-t   | 0,048242  | -1,3166  |
| Naa40         | NM_027643 // Naa40 // N(alpha)-acetyltransferase 40, NatD catalytic subunit, hom   | 0,0482949 | -1,23791 |
| Grik2         | NM_010349 // Grik2 // glutamate receptor, ionotropic, kainate 2 (beta 2) // 10 B   | 0,0484447 | -1,20366 |
| Abtb2         | NM_178890 // Abtb2 // ankyrin repeat and BTB (POZ) domain containing 2 // 2 E2 /   | 0,0484856 | -1,21348 |
| Zfp608        | NM_175751 // Zfp608 // zinc finger protein 608 // 18 D3 // 269023 /// ENSMUST000   | 0,0485273 | -1,24699 |
| 9030624J02Rik | NM_027815 // 9030624J02Rik // RIKEN cDNA 9030624J02 gene // 7 F3 // 71517 /// EN   | 0,0485504 | -1,21463 |
| Slc38a1       | NM_134086 // Slc38a1 // solute carrier family 38, member 1 // 15 F1 // 105727 //   | 0,0485873 | -1,22539 |
| Kif26b        | NM_001161665 // Kif26b // kinesin family member 26B // 1 H4 // 269152 /// BC1207   | 0,048628  | -1,23074 |
| Thada         | NM_183021 // Thada // thyroid adenoma associated // 17 E4 // 240174 /// ENSMUST0   | 0,0486844 | -1,24056 |
| Ankrd17       | NM_030886 // Ankrd17 // ankyrin repeat domain 17 // -- // 81702 /// NM_198010 /    | 0,0486896 | -1,23718 |
| Slc6a15       | NM_175328 // Slc6a15 // solute carrier family 6 (neurotransmitter transporter),    | 0,0487793 | -1,20435 |
| Atp10a        | NM_009728 // Atp10a // ATPase, class V, type 10A // 7 C // 11982 /// ENSMUST0000   | 0,0487958 | -1,2973  |
| Gipc1         | NM_018771 // Gipc1 // GIPC PDZ domain containing family, member 1 // 8 C3 // 679   | 0,0489301 | -1,20288 |
| Polg          | NM_017462 // Polg // polymerase (DNA directed), gamma // 7 E // 18975 /// ENSMUS   | 0,0490308 | -1,23149 |
| Igsf21        | NM_198610 // Igsf21 // immunoglobulin superfamily, member 21 // 4 D3 // 230868 /// | 0,0490403 | -1,25134 |
| H2afx         | NM_010436 // H2afx // H2A histone family, member X // 9 A5.2 9 26.0 cM // 15270    | 0,0490486 | -1,25042 |
| Bap1          | NM_027088 // Bap1 // Brca1 associated protein 1 // 14 B // 104416 /// ENSMUST000   | 0,049396  | -1,20756 |
| Spag4         | NM_139151 // Spag4 // sperm associated antigen 4 // 2 H1 // 245865 /// ENSMUST00   | 0,0494616 | -1,22972 |
| Rnf31         | NM_194346 // Rnf31 // ring finger protein 31 // 14 C3 // 268749 /// ENSMUST00000   | 0,0494935 | -1,22609 |
| Gatad2b       | NM_139304 // Gatad2b // GATA zinc finger domain containing 2B // 3 F1 // 229542    | 0,0495114 | -1,24965 |
| Tns1          | NM_027884 // Tns1 // tensin 1 // 1 C3 1 44.5 cM // 21961                           | 0,0496538 | -1,26764 |
| Pm20d1        | NM_178079 // Pm20d1 // peptidase M20 domain containing 1 // 1 E4 // 212933 /// E   | 0,0497218 | -1,21381 |
| Znrf3         | NM_001080924 // Znrf3 // zinc and ring finger 3 // 11 A1 // 407821 /// ENSMUST00   | 0,0497276 | -1,25811 |
| Mark4         | NM_172279 // Mark4 // MAP/microtubule affinity-regulating kinase 4 // 7 A3 // 23   | 0,0497746 | -1,29041 |
| Dner          | NM_152915 // Dner // delta/notch-like EGF-related receptor // 1 C5 // 227325 ///   | 0,0498757 | -1,2333  |
| Cpeb3         | NM_198300 // Cpeb3 // cytoplasmic polyadenylation element binding protein 3 // 1   | 0,049881  | -1,26563 |
| Pex26         | NM_028730 // Pex26 // peroxisomal biogenesis factor 26 // 6 F1 // 74043 /// ENSM   | 0,0499745 | -1,22208 |

**Table S1: LIST OF UP-REGULATED GENES IN THE PFC OF DA-D2RKO MICE**

| Gene Symbol | gene_assignment                                                                  | p-value   | Fold-Change(KO vs. WT) |
|-------------|----------------------------------------------------------------------------------|-----------|------------------------|
| Ccl21a      | NM_011124 // Ccl21a // chemokine (C-C motif) ligand 21A // 4 A514 13.3 cM // 188 | 0,02327   | 3,62439                |
| ND3         | ENSMUST0000082411 // ND3 // NADH dehydrogenase subunit 3 // --- // 17718 // EN   | 0,0154153 | 1,20356                |
