# Supplementary material
Source: PubMed Central journal article supplement (PMC4211954)
Supplement: NIHMS597313-supplement-3.pdf [file NIHMS597313-supplement-3.pdf]

**Table S2 LIST OF DOWN-REGULATED GENES IN THE vStr OF DA-D2RKO MICE**

| Gene Symbol   | gene_assignment                                                                          | p-value    | Fold-Change(KO vs. WT) |
|---------------|------------------------------------------------------------------------------------------|------------|------------------------|
| Adcyap1       | NM_009625 // Adcyap1 // adenylate cyclase activating polypeptide 1 // 17 E5 17 // 11516  | 0,00372226 | -1,37219               |
| Prp2          | NM_031499 // Prp2 // proline rich protein 2 // 6 G1 6 // 83380 /// NM_031499 // Prp2 //  | 0,0490013  | -1,34497               |
| Coro6         | NM_139128 // Coro6 // coronin 6 // 11 B5 11 // 216961 /// NM_139130 // Coro6 // coronin  | 0,00449261 | -1,30126               |
| Tmem163       | NM_028135 // Tmem163 // transmembrane protein 163 // 1 E3 1 // 72160 /// ENSMUST00000002 | 0,0393841  | -1,26834               |
| Krtap10-10    | NM_001024709 // Krtap10-10 // keratin associated protein 10-10 // 10 C1 10 // 544710     | 0,0415495  | -1,24761               |
| Fndc5         | NM_027402 // Fndc5 // fibronectin type III domain containing 5 // 4 D2.2 4 // 384061 //  | 0,0106225  | -1,24635               |
| Rxfp1         | NM_212452 // Rxfp1 // relaxin/insulin-like family peptide receptor 1 // 3 E3 3 // 38148  | 0,0262305  | -1,24165               |
| Myo7a         | NM_008663 // Myo7a // myosin VIIA // 7 E2 7 48.1 cM // 17921 /// AY821853 // Myo7a // m  | 0,0213438  | -1,24003               |
| Hapln4        | NM_177900 // Hapln4 // hyaluronan and proteoglycan link protein 4 // 8 B3.3 8 // 330790  | 0,0164129  | -1,23658               |
| Ptpn3         | NM_011207 // Ptpn3 // protein tyrosine phosphatase, non-receptor type 3 // 4 B3 4 27.0   | 0,0364476  | -1,22257               |
| Prdm14        | NM_001081209 // Prdm14 // PR domain containing 14 // 1 A3 1 // 383491 /// ENSMUST000001  | 0,0136842  | -1,21221               |
| Lta           | NM_010735 // Lta // lymphotoxin A // 17 B1 17 19.06 cM // 16992 /// ENSMUST00000025266   | 0,0225999  | -1,21197               |
| Gm10101       | ENSMUST00000074862 // Gm10101 // predicted gene 10101 // 14 B 14 // 328388               | 0,0234518  | -1,20987               |
| Apol7c        | NM_175391 // Apol7c // apolipoprotein L 7c // 15 E1 15 // 108956 /// ENSMUST00000062562  | 0,042852   | -1,20922               |
| Bik           | NM_007546 // Bik // BCL2-interacting killer // 15 E1 15 // 12124 /// ENSMUST00000016902  | 0,0488949  | -1,20739               |
| A530088E08Rik | NR_029458 // A530088E08Rik // RIKEN cDNA A530088E08 gene // 17 A3.3 17 // 664702 /// NM  | 0,0259243  | -1,20556               |
| Krtap10-4     | NM_001135991 // Krtap10-4 // keratin associated protein 10-4 // 10 10 // 100191037 //    | 0,0262295  | -1,20527               |
| Kcns3         | NM_173417 // Kcns3 // potassium voltage-gated channel, delayed-rectifier, subfamily S,   | 0,032172   | -1,20418               |
| Gm5592        | NM_001033782 // Gm5592 // predicted gene 5592 // 7 B3 7 // 434172 /// ENSMUST0000009704  | 0,0211663  | -1,20396               |
| 1700061G19Rik | BC116283 // 1700061G19Rik // RIKEN cDNA 1700061G19 gene // 17 D 17 // 78625 /// ENSMUST  | 0,00854554 | -1,2023                |

**Table S2 LIST OF UP-REGULATED GENES IN THE vStr OF DA-D2RKO MICE**

| Gene Symbol   | gene_assignment                                                                          | p-value    | Fold-Change(KO vs. WT) |
|---------------|------------------------------------------------------------------------------------------|------------|------------------------|
| Plcd4         | NM_001081456 // Plcd4 // phospholipase C, delta 4 // 1 C3 1 39.2 cM // 18802 /// NM_148  | 0,0225465  | 1,20036                |
| Fcer1g        | NM_010185 // Fcer1g // Fc receptor, IgE, high affinity I, gamma polypeptide // 1 H3 1 9  | 0,00256497 | 1,20341                |
| Syne2         | NM_001005510 // Syne2 // synaptic nuclear envelope 2 // 12 C3 12 33.0 cM // 319565       | 0,0389125  | 1,20367                |
| Rpl18         | NM_009077 // Rpl18 // ribosomal protein L18 // 7 B4 7 // 19899 /// ENSMUST0000075178 //  | 0,012362   | 1,20447                |
| Peli2         | NM_033602 // Peli2 // pellino 2 // 14 C1 14 16.5 cM // 93834 /// ENSMUST0000073150 //    | 0,0245458  | 1,20447                |
| Dhfr          | NM_010049 // Dhfr // dihydrofolate reductase // 13 C3 13 43.0 cM // 13361 /// NM_010829  | 0,00238679 | 1,20451                |
| Cnn3          | NM_028044 // Cnn3 // calponin 3, acidic // 3 G1 3 // 71994 /// ENSMUST0000029773 // Cn   | 0,0184719  | 1,20479                |
| Ints12        | NM_027927 // Ints12 // integrator complex subunit 12 // 3 3 H2 // 71793 /// ENSMUST00000 | 0,0256696  | 1,20557                |
| Etv1          | NM_007960 // Etv1 // ets variant gene 1 // 12 A3-B1 12 18.5 cM // 14009 /// NM_00116315  | 0,0448863  | 1,20583                |
| Hmgxb4        | NM_178017 // Hmgxb4 // HMG box domain containing 4 // 8 C1 8 // 70823 /// ENSMUST000000  | 0,00988011 | 1,20625                |
| 1200016B10Rik | NM_025819 // 1200016B10Rik // RIKEN cDNA 1200016B10 gene // 1 1 G2 // 66875 /// ENSMUST  | 0,0408405  | 1,20642                |
| Ezh2          | NM_007971 // Ezh2 // enhancer of zeste homolog 2 (Drosophila) // 6 B 6 19.2 cM // 14056  | 0,00660845 | 1,20763                |
| Rpp38         | NM_001013376 // Rpp38 // ribonuclease P/MRP 38 subunit (human) // 2 A1 2 // 227522 ///   | 0,0321402  | 1,2084                 |
| Iqcg          | NM_178378 // Iqcg // IQ motif containing G // 16 B3 16 // 69707 /// ENSMUST00000115100   | 0,0295017  | 1,20967                |
| Gtf3c6        | NM_026113 // Gtf3c6 // general transcription factor IIIC, polypeptide 6, alpha // 10 B1  | 0,0399702  | 1,20982                |
| Cenpq         | NM_031863 // Cenpq // centromere protein Q // 17 B2 17 // 83815 /// ENSMUST0000087114    | 0,0176951  | 1,20994                |
| Esco2         | NM_028039 // Esco2 // establishment of cohesion 1 homolog 2 (S. cerevisiae) // 14 D1 14  | 0,0277845  | 1,20994                |
| Hn1l          | NM_198937 // Hn1l // hematological and neurological expressed 1-like // 17 A3.3 17 11.0  | 0,016434   | 1,21016                |
| Parp11        | NM_181402 // Parp11 // poly (ADP-ribose) polymerase family, member 11 // 6 F3 6 // 1011  | 0,0166815  | 1,21048                |
| Srp14         | NM_009273 // Srp14 // signal recognition particle 14 // 2 E5 2 // 20813 /// ENSMUST00000 | 0,00490815 | 1,21066                |
| Mospd1        | NM_027409 // Mospd1 // motile sperm domain containing 1 // X X A4 // 70380 /// ENSMUSTO  | 0,00456451 | 1,21089                |
| Zfp182        | NM_001013387 // Zfp182 // zinc finger protein 182 // X A1.3 X // 319535 /// NM_00111107  | 0,0199082  | 1,21137                |
| Acadsb        | NM_025826 // Acadsb // acyl-Coenzyme A dehydrogenase, short/branched chain // 7 7 F4 //  | 0,0168713  | 1,21153                |
| Nuf2          | NM_023284 // Nuf2 // NUF2, NDC80 kinetochore complex component, homolog (S. cerevisiae)  | 0,0246431  | 1,21244                |
| Tiparp        | NM_178892 // Tiparp // TCDD-inducible poly(ADP-ribose) polymerase // 3 E1 3 // 99929 //  | 0,0271081  | 1,21325                |
| Ccdc46        | NM_029606 // Ccdc46 // coiled-coil domain containing 46 // 11 E1 11 // 76380 /// NM_145  | 0,0110044  | 1,21402                |
| Pex1          | NM_027777 // Pex1 // peroxisomal biogenesis factor 1 // 5 5 A2 // 71382 /// ENSMUST00000 | 0,043955   | 1,21406                |
| Cd99l2        | NM_138309 // Cd99l2 // CD99 antigen-like 2 // X A6-B X // 171486 /// ENSMUST0000080035   | 0,041989   | 1,21701                |
| Med21         | NM_025315 // Med21 // mediator complex subunit 21 // 6 G3 6 74.0 cM // 108098 /// ENSMU  | 0,0147142  | 1,21722                |
| Edem1         | NM_138677 // Edem1 // ER degradation enhancer, mannosidase alpha-like 1 // 6 E2 6 // 19  | 0,00968076 | 1,21734                |
| Ide           | NM_031156 // Ide // insulin degrading enzyme // 19 C2 19 25.0 cM // 15925 /// BCO41675   | 0,0453856  | 1,21782                |
| 1110002B05Rik | NM_134054 // 1110002B05Rik // RIKEN cDNA 1110002B05 gene // 12 C1 12 // 104725 /// ENSM  | 0,00227235 | 1,21892                |
| Arap2         | NM_178407 // Arap2 // ArfGAP with RhoGAP domain, ankyrin repeat and PH domain 2 // 5 C3  | 0,0116217  | 1,21914                |
| Zfp652        | NM_201609 // Zfp652 // zinc finger protein 652 // 11 D 11 // 268469 /// ENSMUST00000107  | 0,00774512 | 1,21971                |
| Gm13139       | NM_001083918 // Gm13139 // predicted gene 13139 // 4 E1 4 // 666532 /// ENSMUST00000084  | 0,0404131  | 1,22007                |
| Maml2         | NM_001013813 // Maml2 // mastermind like 2 (Drosophila) // 9 A1 9 // 270118 /// NM_1737  | 0,0166636  | 1,22063                |
| Dusp1         | NM_013642 // Dusp1 // dual specificity phosphatase 1 // 17 A2-C 17 13.0 cM // 19252 ///  | 0,0364651  | 1,22133                |
| Chi3l1        | NM_007695 // Chi3l1 // chitinase 3-like 1 // 1 E4 1 72.3 cM // 12654 /// ENSMUST0000015  | 0,0298438  | 1,22217                |
| 4930420K17Rik | BC147127 // 4930420K17Rik // RIKEN cDNA 4930420K17 gene // 5 A1 5 // 652925 /// NM_0010  | 0,0186374  | 1,2233                 |
| Prrx1         | NM_175686 // Prrx1 // paired related homeobox 1 // 1 H2.1 1 85.4 cM // 18933 /// NM_011  | 0,0338316  | 1,22411                |
| Prepl         | NM_054077 // Prepl // proline arginine-rich end leucine-rich repeat // 1 E4 1 74.3 cM // | 0,00451575 | 1,22465                |

|               |                                                                                          |             |         |
|---------------|------------------------------------------------------------------------------------------|-------------|---------|
| Zfp654        | NM_028059 // Zfp654 // zinc finger protein 654 // 16 C1.3 16 // 72020 /// ENSMUST000000  | 0,0322069   | 1,22738 |
| Dusp4         | NM_176933 // Dusp4 // dual specificity phosphatase 4 // 8 A4 8 // 319520 /// ENSMUST000  | 0,00538093  | 1,23036 |
| Hsd17b7       | NM_010476 // Hsd17b7 // hydroxysteroid (17-beta) dehydrogenase 7 // 1 H3 1 // 15490 ///  | 0,00740501  | 1,23124 |
| Cd53          | NM_007651 // Cd53 // CD53 antigen // 3 F2.3 3 50.5 cM // 12508 /// ENSMUST0000038845 /   | 0,000696151 | 1,23209 |
| Tmpo          | NM_001080129 // Tmpo // thymopoietin // 10 C2 10 49.0 cM // 21917 /// NM_001080130 // T  | 0,0477686   | 1,23354 |
| AA388235      | NR_033305 // AA388235 // expressed sequence AA388235 // 17 B1 17 // 433100 /// ENSMUSTO  | 0,0237963   | 1,23486 |
| Prr11         | NM_175563 // Prr11 // proline rich 11 // 11 C 11 // 270906 /// ENSMUST0000051395 // Pr   | 0,0486726   | 1,23655 |
| Gkap1         | NM_019832 // Gkap1 // G kinase anchoring protein 1 // 13 B1 13 35.0 cM // 56278 /// ENS  | 0,0121784   | 1,2366  |
| Actl6a        | NM_019673 // Actl6a // actin-like 6A // 3 A3 3 // 56456 /// ENSMUST0000029214 // Actl6   | 0,0044247   | 1,23836 |
| Arhgap42      | NM_027823 // Arhgap42 // Rho GTPase activating protein 42 // 9 A1 9 // 71544 /// BC1378  | 0,00283174  | 1,23943 |
| Mcm7          | NM_008568 // Mcm7 // minichromosome maintenance deficient 7 (S. cerevisiae) // 5 5 G1 /  | 0,0149519   | 1,2399  |
| Zik1          | NM_009577 // Zik1 // zinc finger protein interacting with K protein 1 // 7 A1 7 // 2277  | 0,0249168   | 1,24044 |
| Serping1      | NM_009776 // Serping1 // serine (or cysteine) peptidase inhibitor, clade G, member 1 //  | 0,0374296   | 1,24125 |
| Trp53inp1     | NM_021897 // Trp53inp1 // transformation related protein 53 inducible nuclear protein 1  | 0,0156594   | 1,24133 |
| BC018101      | NM_001005358 // BC018101 // cDNA sequence BC018101 // 17 A3.1 17 // 449000 /// NM_01176  | 0,0189922   | 1,24371 |
| Ppp1r14b      | NM_008889 // Ppp1r14b // protein phosphatase 1, regulatory (inhibitor) subunit 14B // 1  | 0,0200905   | 1,2448  |
| Slitrk2       | NM_001161431 // Slitrk2 // SLIT and NTRK-like family, member 2 // X X A5 // 245450 ///   | 0,0348077   | 1,24507 |
| Mamdc2        | NM_174857 // Mamdc2 // MAM domain containing 2 // 19 B 19 // 71738 /// ENSMUST000000360  | 0,032367    | 1,24544 |
| Actr6         | NM_025914 // Actr6 // ARP6 actin-related protein 6 homolog (yeast) // 10 C2 10 // 67019  | 0,0498338   | 1,24615 |
| Zfp361i       | NM_007564 // Zfp361i // zinc finger protein 36, C3H type-like 1 // 12 C3 12 // 12192 //  | 0,0242145   | 1,24684 |
| Xrcc4         | NM_028012 // Xrcc4 // X-ray repair complementing defective repair in Chinese hamster ce  | 0,0224319   | 1,24787 |
| C4b           | NM_009780 // C4b // complement component 4B (Chido blood group) // 17 B1 17 18.8 cM //   | 0,0341211   | 1,24843 |
| Uty           | NM_009484 // Uty // ubiquitously transcribed tetratricopeptide repeat gene, Y chromosom  | 0,0366842   | 1,24941 |
| Mycn          | NM_008709 // Mycn // v-myc myelocytomatosis viral related oncogene, neuroblastoma deriv  | 0,0296404   | 1,24943 |
| 1700094D03Rik | NM_028567 // 1700094D03Rik // RIKEN cDNA 1700094D03 gene // 3 F1 3 // 73545 /// ENSMUST  | 0,0439636   | 1,24968 |
| Spef2         | NM_177123 // Spef2 // sperm flagellar 2 // 15 A1 15 // 320277 /// ENSMUST0000041840 //   | 0,0191699   | 1,25316 |
| Syt10         | NM_018803 // Syt10 // synaptotagmin X // 15 15 F1 // 54526 /// ENSMUST0000029441 // Sy   | 0,0037326   | 1,25469 |
| Akr1e1        | NM_018859 // Akr1e1 // aldo-keto reductase family 1, member E1 // 13 A1 13 // 56043 ///  | 0,0208455   | 1,25569 |
| 10-sept       | NM_001024911 // Sept10 // septin 10 // 10 B4 10 // 103080 /// NM_001024910 // Sept10 //  | 0,00711485  | 1,25613 |
| Cetn4         | NM_145825 // Cetn4 // centrin 4 // 3 B 3 // 207175 /// ENSMUST00000102955 // Cetn4 // c  | 0,0151087   | 1,25618 |
| Tmem123       | NM_133739 // Tmem123 // transmembrane protein 123 // 9 A1 9 // 71929 /// ENSMUST00000005 | 0,0329784   | 1,26149 |
| Dapp1         | NM_011932 // Dapp1 // dual adaptor for phosphotyrosine and 3-phosphoinositides 1 // 3 H  | 0,00747264  | 1,26217 |
| Rrm1          | NM_009103 // Rrm1 // ribonucleotide reductase M1 // 7 E3 7 69.0 cM // 20133 /// ENSMUST  | 0,00934194  | 1,26572 |
| Hat1          | NM_026115 // Hat1 // histone aminotransferase 1 // 2 C2 2 // 107435 /// ENSMUST00000112  | 0,0151763   | 1,2674  |
| Psmc6         | NM_025959 // Psmc6 // proteasome (prosome, macropain) 26S subunit, ATPase, 6 // 14 14 C  | 0,0109584   | 1,26765 |
| Rnu73b        | NR_004418 // Rnu73b // U73B small nuclear RNA // --- // 19871                            | 0,0161357   | 1,26783 |
| Tpm4          | NM_001001491 // Tpm4 // tropomyosin 4 // 8 B3.3 8 // 326618 /// ENSMUST0000003575 // T   | 0,00124617  | 1,26801 |
| Ppp1r14b      | NM_008889 // Ppp1r14b // protein phosphatase 1, regulatory (inhibitor) subunit 14B // 1  | 0,0305101   | 1,26823 |
| Tubb2b        | NM_023716 // Tubb2b // tubulin, beta 2B // 13 13 A4 // 73710 /// ENSMUST00000075774 //   | 0,0376298   | 1,26959 |
| Slc12a6       | NM_133648 // Slc12a6 // solute carrier family 12, member 6 // 2 E3 2 // 107723 /// NM_1  | 0,042384    | 1,26973 |
| Gpr137b-ps    | NR_003568 // Gpr137b-ps // G protein-coupled receptor 137B, pseudogene // 13 A1 13 // 6  | 0,0236258   | 1,27224 |
| Sncaip        | NM_026408 // Sncaip // synuclein, alpha interacting protein (synphilin) // 18 D1 18 //   | 0,0106941   | 1,27482 |
| Slc7a11       | NM_011990 // Slc7a11 // solute carrier family 7 (cationic amino acid transporter, y+ sy  | 0,00506131  | 1,2756  |
| Tpx2          | NM_001141977 // Tpx2 // TPX2, microtubule-associated protein homolog (Xenopus laevis) /  | 0,0247973   | 1,27773 |
| Mir99a        | NR_029535 // Mir99a // microRNA 99a // 16 16 // 387229                                   | 0,045021    | 1,27816 |

|               |                                                                                          |            |         |
|---------------|------------------------------------------------------------------------------------------|------------|---------|
| Cdc14a        | NM_001080818 // Cdc14a // CDC14 cell division cycle 14 homolog A (S. cerevisiae) // 3 G  | 0,0180283  | 1,28145 |
| Igfbp5        | NM_010518 // Igfbp5 // insulin-like growth factor binding protein 5 // 1 C3 1 36.1 cM /  | 0,0371565  | 1,28708 |
| Spef2         | NM_177123 // Spef2 // sperm flagellar 2 // 15 A1 15 // 320277 /// ENSMUST00000041840 //  | 0,00852971 | 1,289   |
| Bgn           | NM_007542 // Bgn // biglycan // X B X 29.3 cM // 12111 /// ENSMUST00000033741 // Bgn //  | 0,0153895  | 1,30101 |
| Mad21         | NM_019499 // Mad21 // MAD2 mitotic arrest deficient-like 1 (yeast) // 6 C1 6 30.3 cM /   | 0,0248365  | 1,3016  |
| Snord47       | NR_028543 // Snord47 // small nucleolar RNA, C/D box 47 // 1 1 // 100217446              | 0,0320626  | 1,30608 |
| Hist2h3c2-ps  | NM_054045 // Hist2h3c2-ps // histone cluster 2, H3c2, pseudogene // 3 F2.1 3 // 97114 /  | 0,0256741  | 1,31232 |
| Cyp39a1       | NM_018887 // Cyp39a1 // cytochrome P450, family 39, subfamily a, polypeptide 1 // 17 B3  | 0,00122172 | 1,3134  |
| Pcdhb6        | NM_053131 // Pcdhb6 // protocadherin beta 6 // 18 B3 18 // 93877 /// ENSMUST00000061717  | 0,0144836  | 1,32899 |
| Gm10561       | ENSMUST00000097736 // Gm10561 // predicted gene 10561 // 1 C1.2 1 // 628004              | 0,0329038  | 1,3342  |
| Hmgn5         | NM_016710 // Hmgn5 // high-mobility group nucleosome binding domain 5 // X D X // 50887  | 0,0102554  | 1,33572 |
| Sox11         | NM_009234 // Sox11 // SRY-box containing gene 11 // 12 A3 12 // 20666 /// ENSMUST0000000 | 0,0285784  | 1,3366  |
| Rnu2          | NR_004414 // Rnu2 // U2 small nuclear RNA // --- // 19848 /// NR_004414 // Rnu2 // U2 s  | 0,0470998  | 1,34096 |
| Sgol2         | NM_199007 // Sgol2 // shugoshin-like 2 (S. pombe) // 1 C1.3 1 30.1 cM // 68549 /// NM_0  | 0,00793687 | 1,35045 |
| Pou3f2        | ENSMUST00000098234 // Pou3f2 // POU domain, class 3, transcription factor 2 // 4 A3 4 6  | 0,0415564  | 1,35326 |
| Iftm3         | NM_025378 // Iftm3 // interferon induced transmembrane protein 3 // 7 F5 7 // 66141 //   | 0,0244907  | 1,36724 |
| Smc4          | NM_133786 // Smc4 // structural maintenance of chromosomes 4 // 3 3 E2 // 70099 /// ENS  | 0,00245889 | 1,37119 |
| Rnd3          | NM_028810 // Rnd3 // Rho family GTPase 3 // 2 C1.1 2 // 74194 /// ENSMUST00000017288 //  | 0,00995782 | 1,40331 |
| Slnf3         | AF099974 // Slnf3 // schlafen 3 // 11 C 11 // 20557                                      | 0,0453041  | 1,41591 |
| 2810417H13Rik | NM_026515 // 2810417H13Rik // RIKEN cDNA 2810417H13 gene // 9 C 9 // 68026 /// ENSMUSTO  | 0,0498516  | 1,42133 |
| Gpx8          | NM_027127 // Gpx8 // glutathione peroxidase 8 (putative) // 13 D2.2 13 // 69590 /// ENS  | 0,0048596  | 1,43986 |
| Nr4a1         | NM_010444 // Nr4a1 // nuclear receptor subfamily 4, group A, member 1 // 15 15 F // 153  | 0,027998   | 1,47919 |
| Vaultrc5      | NR_027885 // Vaultrc5 // vault RNA component 5 // --- // 378472                          | 0,0197638  | 1,4887  |
| Sfrp1         | NM_013834 // Sfrp1 // secreted frizzled-related protein 1 // 8 A2 8 9.5 cM // 20377 //   | 0,020122   | 1,49464 |
| Gpr50         | NM_010340 // Gpr50 // G-protein-coupled receptor 50 // X A7.2 X 26.0 cM // 14765 /// EN  | 0,0119075  | 1,65563 |
| Cd24a         | NM_009846 // Cd24a // CD24a antigen // 10 B2 10 26.0 cM // 12484 /// BC075622 // Cd24a   | 0,0293349  | 1,98737 |
