# Supplementary material
Source: PubMed Central journal article supplement (PMC4211954)
Supplement: NIHMS597313-supplement-4.pdf [file NIHMS597313-supplement-4.pdf]

Table S3

GENE ONTOLOGY ANALYSIS OF DOWN-REGULATED GENES IN THE PFC OF DA-D2RKO MICE

| Items      | Items_Details                                   | Support | pvalue   | corrected pval | Genes                                                                                                                                                                                                                                                                                                                                                                                                                                                                                                                                                                                                                                                                                                                                                                                                                                                                                                                                                                                                                                                                                                                                                                                                                                                                                                                                                                                                                                                                                                                                                                                                                                                                                                                                                                                                                                                                                                                                                                                                                                                                                   |
|------------|-------------------------------------------------|---------|----------|----------------|-----------------------------------------------------------------------------------------------------------------------------------------------------------------------------------------------------------------------------------------------------------------------------------------------------------------------------------------------------------------------------------------------------------------------------------------------------------------------------------------------------------------------------------------------------------------------------------------------------------------------------------------------------------------------------------------------------------------------------------------------------------------------------------------------------------------------------------------------------------------------------------------------------------------------------------------------------------------------------------------------------------------------------------------------------------------------------------------------------------------------------------------------------------------------------------------------------------------------------------------------------------------------------------------------------------------------------------------------------------------------------------------------------------------------------------------------------------------------------------------------------------------------------------------------------------------------------------------------------------------------------------------------------------------------------------------------------------------------------------------------------------------------------------------------------------------------------------------------------------------------------------------------------------------------------------------------------------------------------------------------------------------------------------------------------------------------------------------|
| GO:0006355 | regulation of transcription, DNA dependent (BP) | 240     | 5,50E-51 | 1,82E-47       | Glis2,Cbfa2t3,Ube2t3,Klf3,Rreb1,Myst4,Pias3,Kdm4a,Zfp746,Cnot1,Zfp536,Erec3,Nkrf,Fubp1,Elfemp1,Alx4,Notch2,Ikzf4,Pknox2,Csdc2,Hdac4,Bbx,Tceb3,Zxdc,Phf17,Zfp668,Ncoa2,Dnmt1,Srebf2,Sp4,Tada3,Eliz2eb2,Hipk2,Mmp14,Insr,Hnrrp1,Gli3,Zhxi,Crebbp,Foxo3,Tead1,Pou5f2,Lef1,Atf6b,Elf2c2,Taf1d,Purb,Patz1,Notch3,Nr2f2,Tref1,Pbx1,Cux1,Nfe2l2,Hivep3,Tcf7,Lass4,Hdac1,Rxra,Zfp628,Hey2,Tcf3,Ncor2,Tet1,Nr2c2,Foxp1,Nr3c2,Pgf2,Epc1,Lhx2,Med13,Phf1,Cic,Zbtb20,Myocn,Ctbp2,Arnt,Phf2,Rnf10,Med1,Pou3f4,Prrnt5,Lrp6,Csrnp2,Bcl9l,Smad3,Ash1,Cbfa2t2,Zfp523,Sin3b,Hkac,Map3k7,Max,Sp2,Crtc3,Tcf4,Iso80d,Hip1,Tbx3,Per1,Arid1a,Nr2e1,Zfp618,Pml,Ebf1,Nfat2,Gatad2a,Ppard,Rbm15b,Nfix,Sap130,Zfp652,Arb2,Nacc1,Hdac6,Npac3k7,Ddit3,Sf1,Zkscan1,Mll1,Mll5,Rere,Ncoa1,Pou2f1,Nfic,Tle1,Gatad2b,Prdm16,Nr1d1,Kdm4c,Pnrc2,Mecp2,Crtc2,Nlk,Rela,Arid5b,Ctcf1,Ctbp1,Ern1,Jhdm14,Med12l,Rxrb,Lbh,Rcor1,Stat3,Sox10,Kcnh3,Chd4,Stat5b,Kat2a,Zfp202,Nfat3,Sox9,Hexim2,Suv39h1,Mcrs1,Tcf7l1,Zfp827,Kdm3b,Med16,Thra,Crebzf,Hira21a,Tox3,Pura,Tle3,Zic3,Smarca4,Srf,Zbtb33,Nfib,Chd7,Setd1b,Hdac9,Lim1d1,Foxj2,Atf7ip,Klf13,Jarid2,Eng,Chmp1a,Foxk1,Ets1,Hcf1,Zfp58,Camta2,Hipk3,Erbb4,Mkl1,Sp1,Elf2c1,Nfia,Zfp516,Zfp148,Srebf1,Zfp579,Tcf7l2,Atn1,Cbx4,Med25,Ctndd2,Zhx2,Tsc22d1,Prdm10,Nsd1,Hivep2,Scorf1,Pkn1,Spem,Scrt1,Hipk3,Erbb4,Mkl1,Mef2d,Zfp592,Btg2,Ikzf2,Kdm4b,Med24,Epas1,Rfx4,Mll2,Meis2,Foxf2,Foxn3,Tcf3,Nr4a2,Tcf12,Zxdb,Ncoa3,Sox12,Scmh1,Med13,Dnmt3a,Zfp30,Zfp687,Ttrap,Nrbp2,Prkca,Mertk,Map4k2,Mast4,Lrrk2,Brsk1,Wnk1,Erc3,Dyrk1a,Speg,Tesk1,Limk1,Hipk4,Tgfb2,Abli,Hipk2,Dapk1,Akt1,Csknkg2,Vrk3,Scy13,Map3k12,Lyn,Kit,P2rx7,Ddr2,Pdgfra,Dguok,Fyn,Ick,Lmtk2,Pkmyt1,Yes1,Mknk2,Rps6ka2,Prkd3,Tie1,Mtor,Stk11,Jak2,Illk,Prkx,Pdgfrb,Kalrn,Stk24,Lmtk3,Mapk4,Akt2,Wnt5a,Nek9,Sik2,Map3k7,Stk16,Scy11,Hus1,Nlk,Raf1,Ulk2,Fgfr2,Ephb4,Ern1,Map3k10,Mast1,Mast2,Gsk3a,Kcnh3,Dyrk1b,Irak2,Smrk,Cdk16,Ulk1,Tw1,Npr2,Alpk1,Taok2,Epha3,Fit1,Axl,Trnk,Brd4,Mink1,Bmpr1a,Tek,Nek6,Tlbbk1,Mark4,Map4k4,Pkn1,Egfr,Cdc42bbp,Alk,Sik3,Hipk3,Adrbk2,Erbb4,Pak2,Src,Fgfr1,Aatk,Map3k11,Ddr1,Insr,Wnk2 |
| GO:0006468 | protein phosphorylation (BP)                    | 105     | 5,23E-33 | 4,33E-30       | Rims1,Slic12a5,Syt9,Slic45a1,Cacna1c,Nup62,Kcnd3,Grik2,Slic4a4,Ipo13,Slic4a3,Trpm3,Cacna1e,G3bp1,Panx2,Kcng3,Slic7a1,Slic3f2,Rab5b,Stx17,Syngn,Slic35b1,Sec22c,Kpnab,Sec31a,Stim1,Vps37c,Tcof1,Slic31a2,Fkbp15,Slic25a38,Ano6,Slic7a2,Akt1,Slic2a1,Kcnh4,Grin2c,Itp2r,Cacng7,Slic14a1,Cux1,Slic25a44,Snx18,Mfsd2a,P2rx7,Arb2,Alidh11l,Clvs1,Dync1l1,Slic6a6,Gabrb3,Osbp2,Slic29a2,Slic46a1,Slic2b1,Cicn7,Syt3,Scn3b,Syt7,Ano1,Grid1,Slic7a1,Atpv60a2,Myo1c,Stard3,Kcnp4,Slic6a15,Slic22a8,Ptbp,Lrp6,Mfsd10,Fads1,Smad3,Cachd1,Slic6a11,Atg7a,Slic7a10,Abcb1a,Clc4,Arhgap33,Atg2b2,Lyt6,Grin2b,Ptprnm2,Fads2,Slic35a4,Akz2,Htt3a,Slic38a3,Slic9a1,Kcnh1,Slic44a1,Cacng3,Sec24b,Cacn1b,Pknox2,Slic620a,Agap1,Slic44a2,Ank,Slic2a13,Rllp1,Slic1a3,Sorbs1,Scy11,Ipo4,Kcnc1,Slic152,Abca1,Tmem38a,Arf6,Atg13b2,Kcng8,Slic25a23,Slic41a1,Agp3d1,Slic32a1,Slic38a1,Kcnh3,Dopey2,Oxsbp9,Slic39b9,Pevx2,Scamp5,Ry2,Snap23,Kcnh6,Slic6a1,Kcng2,Cacna1l,Ranbp2,Pitnm1,Slic6a13,Nlpa1,Slic39a13,Clnc6,Aqp11,jgfr,Ranbp17,Gulp1,Slic35e1,Slic7a11,Kcnc2,Slic12a4,Ap2a1,Xpo4,Sdhc,Kcnk9,Grk5,Xpo6,Grin1,Slic9a5,Ten2,Cadps,Atg5g3,Chmp1a,Abg1,Sec24c,Dync1h1,Abca9,Pllp,Serp1,Kcnt1,Rab11fp5,Slic3a1,Slic12a2,Slic16a13,Slic25a30,Slic7a5,Scn3a,Tnpo1,Tyh1,Fasn,Slic19a3,Scamp3,Slic23a2,Slic5a2,Slic13a3,Slic16a2,Mfsd7,Grin2d,Sypl,Cpt1a,Rab11b,Tpon1,Fabp7,Nusp214,Keng1,Dnaj14,Doc2b,Aqp4                                                                                                                                                                                                                                                                                                                                                                                                                                                                                                                                                                                                                                                                                                         |
| GO:0007399 | nervous system development (BP)                 | 60      | 6,75E-23 | 2,48E-20       | Glik2,Nrbp2,Brsk1,Elav3,Dock7,Gfr1,Akt1,Robo1,Cyfp1,Dcx,Zic2,Nrp2,Dpf1,Efnb1,Amigo1,Lhx2,Lmtk2,Smarce1,Top1,Mknk2,Smrce1,Tcf4,Arid1a,Dscam,Srrm4,Nrg1,Dab1,Arf6,Ulk2,Jhdm14,Sema4f,Gsk3a,Enah,Kat2a,Nav1,Sema6a,Chrd1,Pura,Sh2b2,Zic3,Smarca4,Hdac9,Ascl1,A93003C07Rik,Tnk1,Gpsm1,Sllh3,Mdga1,Slic7a5,Bmpr1a,Mark4,Grip1,Dok4,Erbb4,Mef2d,Tcf3,Nr4a2,Tcf12                                                                                                                                                                                                                                                                                                                                                                                                                                                                                                                                                                                                                                                                                                                                                                                                                                                                                                                                                                                                                                                                                                                                                                                                                                                                                                                                                                                                                                                                                                                                                                                                                                                                                                                              |
| GO:0008152 | metabolic process (BP)                          | 174     | 2,08E-22 | 6,25E-20       | Rdh10,Zc3h12c,Paqss2,Kl,Dhhd,Mgat5b,Alidh18a1,Ppm1m,G3bp1,Nat6,Pde4d,Oplah,Gxylt1,Zdhc3,Ppap2b,Bace1,Acot11,A13002215Rik,Znrf1,Trim9,Pde10a,Ep400,Ube2o,Idua,Hmgcs2,Ddx17,Casp8,Hsd12,Dnmt1,Pygm,Atp10a,Mmp14,Acx3,B3gat3,Ppapdc1a,Phgdh,Fam108a,Nomo1,Agpat2,Phlpp1,Rnf180,Galnt2,AI464131,Man2a2,Neur1B,Atp11a,Alidh11l,1300010F03Rik,Parp6,Dync11l,Ctdsp1,Vars,Picd4,Rnf182,Dync2h1,Dhtkd1l,Rad54l2,Wpmd1,Pcd12,Kif26b,Dpagt1,Apeh,Adam15,Ctbp2,Pm20d1,Slic27a1,Chd3,Tpp1,Myo1c,Mtor,Cenpv,Rnf31,Ubr4,Pde4b,Abhd2,Ddx21,Ddah1,Remt,Rnf125,Bche,Atp7a,Smpd3a,Rnf144b,Pde5a,Uplf1,Galnt1,Dnme2,BC018242,Uxs1,Usp32,B3gat1,Helz,Phlpp2,G6pc3,Mbtps1,Dip2b,Piga,Ece1,Abhd3,Lpcat4,Mpped2,Casp2,Semc1,Entpd1,Abca1,Mmp15,Smpd2,Ube2q1,Rnf123,Ctbp1,Ern1,Anpep,Gne,Na40,Illkap,Gcnt1,Chs1,Gys1,Nav1,Dhx32,Irak2,Zdhc8,Atg13a2,Nat15,Edral1,Atp13a1,Entpd5,Hsd17b11,Pdpx,Inpp4a,Ar5b,Pnk4,Hdac5,Ndst2,Furin,Pla2g4e,Mgrn1,Abat,Asrgl1,Abcg1,Nat8l,Alpl,Dync1h1,Rad9,Fam108c,Capn2,Naa10,Acsf2,Gstm5,Extl1,Zdhc16,Nmnat1,Fasn,Ptprz1,Alg3,Decr2,Nt5dc3,Uggt1,Alk,St3gal3,Rnf19b,Ac01,Ppm1a,Pak2,Cbs,Man2b2,Revo1,Tenc1,Ctdsp2,Fktn,Car4,Dusp22,Alad                                                                                                                                                                                                                                                                                                                                                                                                                                                                                                                                                                                                                                                                                                                                                                                                                                                                                                                                          |
| GO:0030154 | cell differentiation (BP)                       | 84      | 5,37E-20 | 1,48E-17       | Glis2,Cbfa2t3,Vegfb,Scrib,Igav,Huwe1,Notch2,Speg,Cspg4,Elav3,Dock7,Sfrp1,Elf2c2,Purb,Lrrc8a,Trappc9,Notch3,Robo1,Egfr7,Cyfp1,Dcx,Diap2,Pbx1,Zic2,Kit,Nr2c2,Nrp2,Efnb1,Amigo1,Bmp6,Ctbp2,Arnt,Npnt,Jak2,Gna12,Prkx,Sema3c,Ntnng2,Bmp7,Ptpru,Tcf4,Hip1,Fhl1,Wnt5a,Ppard,Srrm4,Prdm16,Dab1,Arf6,Ctbp1,Anpep,Sema4f,Sox10,Enah,Nav1,Sox9,Suv39h1,Jag2,Sema6a,Notch1,Paqr8,Chrd1l,Cadm1,Nhs,Pura,Tle3,Zic3,Dner,Gna13,Fhl1,Axl,Ascl1,Jarid2,Foxk1,Ildr2,Gpsm1,Sllt3,Mdga1,Slic7a5,Bmpr1a,Mef2d,Epas1,Tcf3,Tcf12                                                                                                                                                                                                                                                                                                                                                                                                                                                                                                                                                                                                                                                                                                                                                                                                                                                                                                                                                                                                                                                                                                                                                                                                                                                                                                                                                                                                                                                                                                                                                                              |
| GO:0007155 | cell adhesion (BP)                              | 72      | 2,48E-19 | 5,87E-17       | Tln2,Igsf11,Fn1,Igav,Paap2b,Tmem8,Fbn5,Ferm2,Abli1,Tmem8b,Cyfp2,Pcdhb17,Podxl,Cd164,Ddr2,Tln1,Sorbs3,Nrp2,Celsr1,Clstn3,Ajap1,Amigo1,Ncam1,Cdh19,Megf10,Adam15,Ncan,Npnt,Prkx,Ptpru,Ptprm,Sdc3,Psen1,Cdon,Dscam,Kifl,Cd93,Mllt4,Gpr56,Cntnap5c,Igfa4,Atp1b2,Ephb4,Pecami,Astn1,Pvr1l,Pcdh18,Igfb8,Nrxn3,Cdh5,Fat4,Pcdh20,Nlgn2,Cadm1,Bcan,Ptprs,Esam,Flot2,Eng,Parvb,Pvr13,Gpld1,Ctndd2,Tyh1,Igfa6,Src,Parva,Dgcr2,Dchs1,Lpp,Ddr1,Lamb2                                                                                                                                                                                                                                                                                                                                                                                                                                                                                                                                                                                                                                                                                                                                                                                                                                                                                                                                                                                                                                                                                                                                                                                                                                                                                                                                                                                                                                                                                                                                                                                                                                                 |
| GO:0035556 | intracellular signal transduction (BP)          | 48      | 1,76E-17 | 3,63E-15       | Unc13a,Gab2,Prkca,Pic3d,Abi3,Dv2,Prex1,Acot11,Arfgef2,Arhgef6,Cspg4,Unc13c,Akt1,Rapgef3,Dcx,Plcg1,Lyn,Picd4,Itns1,Adcy1,De8,Sh2b2,Shc3,Prkd3,Kalrn,Arhgef2,Psen1,Pknox2,Psen2,Piccl1,Raf1,Adcy5,Cnh2,Dgk2,Socs7,Sh2b2,Arhgef3,Nrp2,Hlekm1,Arhgef12,Pkh2,Ast1,Dnmbl,Tulp4,Tek,Cdc42bbp,Inpp5d,Tenc1                                                                                                                                                                                                                                                                                                                                                                                                                                                                                                                                                                                                                                                                                                                                                                                                                                                                                                                                                                                                                                                                                                                                                                                                                                                                                                                                                                                                                                                                                                                                                                                                                                                                                                                                                                                      |
| GO:0016477 | cell migration (BP)                             | 30      | 2,01E-14 | 3,03E-12       | Gab2,Nusp62,Scrib,Igav,Lnc16a,Tgfb2,Mmp14,Podxl,Pdgfra,Enpep,Tnfaip1,Cd2ap,Pdgfrb,Dock1,Wnt5a,Nrg1,Igfa4,Astn1,Gsk3a,Nkx2,Fit1,Lim1d1,Eng,Apc,Atn1,Srgap1,Cdc42bbp,Erbb4,Src,Tns3                                                                                                                                                                                                                                                                                                                                                                                                                                                                                                                                                                                                                                                                                                                                                                                                                                                                                                                                                                                                                                                                                                                                                                                                                                                                                                                                                                                                                                                                                                                                                                                                                                                                                                                                                                                                                                                                                                       |
| GO:0016311 | dephosphorylation (BP)                          | 37      | 1,49E-13 | 1,97E-11       | Ppm1a,Paap2b,Phlpp1,Ssh1,Dusp8,Ctdsp1,Ptpru,Ptprm,Cdc14a,BC018242,Phlpp2,Inpp5k,G6pc3,Ptprm,Ptprn13,Ptprg,Illkap,Sec16a,Nt5ca1,Mtmr11,Pdpx,Dusp10,Sf1,Inpp4a,Ptprs,Ptprb,Atpl,Mtmr9,Ptprz1,Inpp5d,Ppm1a,Tenc1,Mtmr10,Ctdsp2,Mtmr3,Dusp22                                                                                                                                                                                                                                                                                                                                                                                                                                                                                                                                                                                                                                                                                                                                                                                                                                                                                                                                                                                                                                                                                                                                                                                                                                                                                                                                                                                                                                                                                                                                                                                                                                                                                                                                                                                                                                                |
| GO:0050790 | regulation of catalytic activity (BP)           | 36      | 4,39E-12 | 4,84E-10       | Map4k2,Prex1,Arfgef2,Arhgef6,Dock7,Rapgef3,Arhgef10,Itns1,D10Bwg1379e,Arhgef10,Arhgef9,Dock6,Arhgef17,Kalrn,Arhgef2,Dock1,Rgl2,Sos2,Piccl1,Fgdl1,Rapgef2,Arhgef4,Psd,Arhgef12,Iqsec2,Tnk1,Gpsm1,Mink1,Dnmbl,Ralgas1,Cyhb3,Map4k4,Cdc42bbp,Iqsec1,Gsf1,Rasgrf2                                                                                                                                                                                                                                                                                                                                                                                                                                                                                                                                                                                                                                                                                                                                                                                                                                                                                                                                                                                                                                                                                                                                                                                                                                                                                                                                                                                                                                                                                                                                                                                                                                                                                                                                                                                                                           |
| GO:2001141 | regulation of RNA biosynthetic process (BP)     | 21      | 2,32E-11 | 2,40E-09       | Ncoa2,Tada3,Crebbp,Rad54l2,Lhx2,Med1,061003106Rik,Calcoco1,Pml,Sap130,Ncoa1,Rxrb,Kat2a,Dcc,Hcf1,Atn1,Nsd1,Lkb1,Lmd1,Ncoa3,Ttrap                                                                                                                                                                                                                                                                                                                                                                                                                                                                                                                                                                                                                                                                                                                                                                                                                                                                                                                                                                                                                                                                                                                                                                                                                                                                                                                                                                                                                                                                                                                                                                                                                                                                                                                                                                                                                                                                                                                                                         |
| GO:0001843 | neural tube closure (BP)                        | 19      | 3,38E-11 | 3,29E-09       | Scrib,Dv12,Dic1,Pchl,Zeb2,Sfrp1,Zic2,Tsc2,Ski,Celsr1,Lhx2,Setd2,Lrp6,Wnt5a,Vangl2,Fzd3,Enah,Kat2a,Sufu                                                                                                                                                                                                                                                                                                                                                                                                                                                                                                                                                                                                                                                                                                                                                                                                                                                                                                                                                                                                                                                                                                                                                                                                                                                                                                                                                                                                                                                                                                                                                                                                                                                                                                                                                                                                                                                                                                                                                                                  |
| GO:0006915 | apoptotic process (BP)                          | 59      | 3,05E-10 | 2,59E-08       | Unc5c,Bag3,Casp8,Phf17,Abli,Hipk2,Foxo3,Dapk1,Purb,Cyfp2,Akt1,Phlpp1,Mknk2,Htt,Stk11,Jak2,Mfsd10,Csrnp2,Dock1,Stk24,Rnf144b,Hipk2,Astn1,Pml,Bnip3,Mtap15,Ppard,Pasc2,Map3k7,Gram4,Ece1,Casp2,Cul7,Arf6,Psen2,Rbm25,Raf1,Fgfr2,Ern1,Irak2,Cecr2,Sema6a,Tox3,Cadm1,Pura,Cideb,Gulp1,Dido1,Trp53bp2,Elmo2,Nek6,Zdhc16,Inpp5d,Hipk3,Erbb4,Mef2d,Pak2,AatK                                                                                                                                                                                                                                                                                                                                                                                                                                                                                                                                                                                                                                                                                                                                                                                                                                                                                                                                                                                                                                                                                                                                                                                                                                                                                                                                                                                                                                                                                                                                                                                                                                                                                                                                   |
| GO:0030519 | somatic stem cell maintenance (BP)              | 14      | 4,54E-10 | 3,66E-08       | Lrp5,Sfrp1,Kil,Ski,Nr2e1,Vangl2,Prdm16,Sox9,Tcf7l1,Myst3,Apc,Tcf7l2,Zhx2,Ldb1                                                                                                                                                                                                                                                                                                                                                                                                                                                                                                                                                                                                                                                                                                                                                                                                                                                                                                                                                                                                                                                                                                                                                                                                                                                                                                                                                                                                                                                                                                                                                                                                                                                                                                                                                                                                                                                                                                                                                                                                           |

|            |                                                                      |    |          |             |                                                                                                                                                                                                                                                                                                                |
|------------|----------------------------------------------------------------------|----|----------|-------------|----------------------------------------------------------------------------------------------------------------------------------------------------------------------------------------------------------------------------------------------------------------------------------------------------------------|
| GO:0048167 | regulation of synaptic plasticity (BP)                               | 12 | 1,27E-09 | 9,74E-08    | Sipa111,Htt,Atp2b2,Grin2b,Psen1,Syngap1,Mecp2,Psen2,Gipc1,Raggef2,Grin1,Ctndd2                                                                                                                                                                                                                                 |
| GO:0007050 | cell cycle arrest (BP)                                               | 20 | 1,68E-09 | 1,21E-07    | Sen2,Notch2,Tgfb2,Pkd1,Pcbp4,Skh1,Ikk,Smad3,Pml,Pkd2,Apbb2,Ddit3,Mli5,Wdr6,Ern1,Gas2l1,Macf1,Apc,Tcf7l2,Cdkn1b                                                                                                                                                                                                 |
| GO:0030036 | actin cytoskeleton organization (BP)                                 | 22 | 3,02E-09 | 2,13E-07    | Epb4,1l2,Daam2,Dcl1,Abli,Diap1,Sfrp1,Diap2,Fmnl1,Shh1,Warf2,Arhgef17,Csrp1,Epb4,1l5,Enah,Fgd1,Cttnbp2,Sh2b2,Srf,Taok2,Cdc42bbp,Fmn1,Parva                                                                                                                                                                      |
| GO:0007389 | pattern specification process (BP)                                   | 20 | 5,01E-09 | 3,31E-07    | Alx4,Ptch1,Gli3,Foxo3,C2cd3,Hey2,Foxo1,Bmp7,Syngap1,Disp1,Smo,Eya1,Zic3,Foxj2,Asc1,Foxk1,Apc,Bmpr1a,Foxf2,Foxn3                                                                                                                                                                                                |
| GO:0001666 | response to hypoxia (BP)                                             | 20 | 1,67E-08 | 9,37E-07    | Pygm,Tgfb2,Itrp2,Tsc2,Pld2,Arnt,Smad3,Tgfb3,Pml,Ece1,Mecp2,Raf1,Egln1,Scap,Ft1,Ednra,Eng,Abat,Epas1,Nr4a2                                                                                                                                                                                                      |
| GO:0016485 | protein processing (BP)                                              | 13 | 6,44E-08 | 3,13E-06    | Ptch1,Gli3,C2cd3,P2rx7,Dync2h1,Psen1,Aph1a,Ece1,Casp2,Pcsk6,Psen2,Furin,Adamts3                                                                                                                                                                                                                                |
| GO:0001754 | neural crest cell migration (BP)                                     | 11 | 1,52E-07 | 6,88E-06    | Zeb2,Lef1,Nrp2,Efnb1,Sema3c,Kitl,Edn3,Sox10,Smo,Sema3f,Erb4                                                                                                                                                                                                                                                    |
| GO:0090090 | negative regulation of canonical Wnt receptor signaling pathway (BP) | 15 | 2,13E-07 | 9,52E-06    | Dab2ip,Apc2,Gli3,Sfrp1,Lef1,Mcc,Dab2,Wnt5a,Ddit3,Sox10,Sov9,Notch1,Apc,Tcf7l2,Lrp4                                                                                                                                                                                                                             |
| GO:0043085 | positive regulation of catalytic activity (BP)                       | 11 | 2,18E-07 | 9,60E-06    | P2rx7,Stk11,Atp7a,Psen1,Aph1a,Ppard,Psen2,Agt,Igf2,Sod1,Nr4a2                                                                                                                                                                                                                                                  |
| GO:0043966 | histone H3 acetylation (BP)                                          | 12 | 2,28E-07 | 9,91E-06    | Myst4,Phf17,Tada3,Lef1,Sap130,Map3k7,Kat2a,Brd1,Myst3,Smarca4,Brpf3,Tcf3                                                                                                                                                                                                                                       |
| GO:0006897 | endocytosis (BP)                                                     | 22 | 2,49E-07 | 1,07E-05    | Tnk2,Lrp5,Epn1,Syng1,Abi1,Fkbp15,Srx18,Arrb2,Itsn1,Lrp10,Wasf2,Lrp8,Lrp6,Usip20,Hip1,Dnm2,Ston2,Npc1,Lrp1,Ap2a1,1700021K19Rik,Lrp4                                                                                                                                                                             |
| GO:0007411 | axon guidance (BP)                                                   | 19 | 2,52E-07 | 1,07E-05    | Pknox3,Tgfb2,Gli3,Robo1,Nrp2,Efnb1,Lhx2,Lmtk2,Bmp7,Wnt5a,Apbb2,L1cam,Pvrl1,Sema4f,Enah,Sema6a,Dcc,Sema3f,Slit3                                                                                                                                                                                                 |
| GO:0008286 | insulin receptor signaling pathway (BP)                              | 12 | 3,08E-07 | 1,27E-05    | Foxo3,Akt1,Foxo1,Akt2,Sik2,Sors1,Gsk3a,Zfp106,Socs7,Sh2b2,Srebf1,Insr                                                                                                                                                                                                                                          |
| GO:0031175 | neuron projection development (BP)                                   | 16 | 5,16E-07 | 2,08E-05    | Dock7,Diap1,Phgdh,Lyn,Pld2,Ngf,Ptprn,Mecp2,L1cam,Ulk1,Srf,Apc,Ncdn,Fgfr1,Btg2,Lamb2                                                                                                                                                                                                                            |
| GO:0021915 | neural tube development (BP)                                         | 10 | 5,43E-07 | 2,17E-05    | Gli3,Sfrp1,Phgdh,C2cd3,Tcf7,Plod3,Lrp6,Wnt5a,Notch1,Tcf7l2                                                                                                                                                                                                                                                     |
| GO:0042593 | glucose homeostasis (BP)                                             | 15 | 6,17E-07 | 2,40E-05    | Cacna1c,Cacna1e,Ptch1,Foxo3,Akt1,Ncor2,Stk11,Adra2a,Inpp5f,Crtc2,Igfbp5,Stat3,Sh2b2,Tcf7l2,Insr                                                                                                                                                                                                                |
| GO:0035264 | multicellular organism growth (BP)                                   | 14 | 7,02E-07 | 2,67E-05    | Slc12a5,Ccm2,Wdtd1,Ankrd11,Bbs1,Arid5b,Fgfr2,Kat2a,Smo,Apba1,Slc12a2,Tenc1,Ncoa3,Heg1                                                                                                                                                                                                                          |
| GO:0009887 | organ morphogenesis (BP)                                             | 18 | 1,02E-06 | 3,63E-05    | Rdh10,Notch2,Ptch1,Pbx1,Pdgfra,Med1,Bmp7,Tgfb3,Tbx3,Gdf11,Wnt5a,Rela,Fgfr2,Thra,Eya1,Slit3,Igf2,Insr                                                                                                                                                                                                           |
| GO:0001764 | neuron migration (BP)                                                | 17 | 1,16E-06 | 4,05E-05    | Nr2f2,Dcx,Fyn,Celsr1,Psen1,Apbb2,Dab1,Fzd3,Nav1,Dcc,Srf,Axl,Asc1,A930038C07Rik,Mdga1,Nr4a2,Fktn                                                                                                                                                                                                                |
| GO:0007626 | locomotory behavior (BP)                                             | 15 | 2,31E-06 | 7,50E-05    | Gng7,Cacna1e,Dlg4,Celsr1,Htt,Atp7a,Atp2b2,Dscam,Nrg1,Adcy5,Astn1,Chd7,Apba1,Abat,Sod1                                                                                                                                                                                                                          |
| GO:0008360 | regulation of cell shape (BP)                                        | 16 | 2,50E-06 | 7,94E-05    | Epb4,1l2,Cdc42ep3,Dcl1,Fermt2,Diap1,Cyflp1,Fmnl1,Fyn,Pknox1,Gna12,Palmd,Fgd1,Cdc42ep4,Gna13,Taok2,Limd1                                                                                                                                                                                                        |
| GO:0006812 | cation transport (BP)                                                | 18 | 2,47E-06 | 7,95E-05    | Trpm3,Atp10a,Stim1,Grin2c,P2rx7,Atp11a,Slc41a3,Atp7a,Atp2b2,Grin2b,Htr3a,Slc9a1,Slc41a1,Atp13a2,Atp13a1,Grin1,Slc12a2,Grin2d                                                                                                                                                                                   |
| GO:0021587 | cerebral cortex development (BP)                                     | 10 | 2,86E-06 | 8,67E-05    | Mkks,Bbs1,Lrp6,Nr2e1,Psen1,Cdon,Ptprs,Grin1,Asc1,Emx2                                                                                                                                                                                                                                                          |
| GO:0007611 | learning or memory (BP)                                              | 10 | 2,86E-06 | 8,67E-05    | Pkca,Gm2a,Ncam1,Htt,Shc3,Grin2b,Psen1,Psen2,Thra,Grin1                                                                                                                                                                                                                                                         |
| GO:0030308 | negative regulation of cell growth (BP)                              | 18 | 3,75E-06 | 0,00011185  | Dab2ip,Tgfb2,Sfrp1,Skh1,Adipor2,Smad3,Dab2,Fhl1,Pml,Ppard,Apbb2,Gas2l1,Agt,Smarca4,Adipor1,Foxk1,Slit3,Cdkn1b                                                                                                                                                                                                  |
| GO:0043401 | steroid hormone mediated signaling (BP)                              | 12 | 3,96E-06 | 0,000117001 | Lef1,Nr2f2,Rora,Nr2c2,Bmp7,Nr2e1,Ppard,Nr1d1,Rwb,Thra,Nr4a2                                                                                                                                                                                                                                                    |
| GO:0035335 | peptidyl-tyrosine dephosphorylation (BP)                             | 16 | 4,01E-06 | 0,000117395 | Shh1,Dusp8,Ptprn,Ptprn,Cdc14a,Ptprn,Ptprn21,Ptprn13,Ptprg,Eya1,Dusp10,Ptprs,Ptprb,Ptprt,Mtmr3,Dusp22                                                                                                                                                                                                           |
| GO:0001756 | somitogenesis (BP)                                                   | 11 | 5,30E-06 | 0,000149869 | Zeb2,Sfrp1,Lef1,Lrp6,Smad3,Psen1,Wnt5a,Psen2,Epb4,1l5,Kat2a,Bmpr1a                                                                                                                                                                                                                                             |
| GO:0006461 | protein complex assembly (BP)                                        | 12 | 6,09E-06 | 0,000169306 | Rims1,Dlg4,Uqgl1,Max,Pml,Mll1,Sov9,Snap23,Dlgap3,Apc,Zfp148,Tgfb3                                                                                                                                                                                                                                              |
| GO:0007268 | synaptic transmission (BP)                                           | 18 | 6,37E-06 | 0,000175685 | Slc12a5,GrmA,Cacna1c,Grik2,Unc13c,Lrp6,Nrxn2,Grin2b,Ston2,Mecp2,Gipc1,Agrn,Nrxn3,Grik5,Grin1,Apba1,Mink1,Grm2                                                                                                                                                                                                  |
| GO:0007605 | sensory perception of sound (BP)                                     | 17 | 6,92E-06 | 0,000187668 | Ptprn,Nipbl,Fzd4,Diap1,Gabrb3,Gjc3,Pou3f4,Atp2b2,Slc13a3,Chd7,Otof,Gjb6,Sod1,Cdkn1b,Fgfr1,Mtap1a,Aqp4                                                                                                                                                                                                          |
| GO:0009092 | cell morphogenesis (BP)                                              | 12 | 1,12E-05 | 0,000279594 | Shroom4,Idua,Tgfb2,Shroom1,Shh1,P2rx7,Med1,Arhgef2,Atp2b2,Nrg1,Smarca4,Egfr                                                                                                                                                                                                                                    |
| GO:0008104 | protein localization (BP)                                            | 13 | 1,80E-05 | 0,000405984 | Erc3,Grin2c,Tsc2,Plod3,Akap2,Mecp2,Macf1,Ulk1,Akap10,Grip1,Lrba,Doc2b,Lrp4                                                                                                                                                                                                                                     |
| GO:0006874 | cellular calcium ion homeostasis (BP)                                | 13 | 2,13E-05 | 0,000468846 | Stc1,Cacna1c,Prkca,Grik2,Igav,Pygm,Atp2b2,Psen1,Pkd2,Trdn,Grin1,Cherp,Gpr12                                                                                                                                                                                                                                    |
| GO:0042493 | response to drug (BP)                                                | 18 | 2,39E-05 | 0,000520718 | Slc12a5,Hdac4,Sfrp1,P2rx7,Pemt,Bche,Lyst,Ptprn,Nfatc2,Slc13a3,Npc1,Abat,Emx2,Igf2,Sod1,Tcf3,Dger2,Alad                                                                                                                                                                                                         |
| GO:0070588 | calcium ion transmembrane transport (BP)                             | 13 | 2,92E-05 | 0,000582578 | Cacna1c,Cacna1e,Itrp2,Cacng7,Atp2b2,Psen1,Cacng4,Cacnb1,Cacnb3,Ryr2,Cacna1i,Grin1,Tpcn1                                                                                                                                                                                                                        |
| GO:0030336 | negative regulation of cell migration (BP)                           | 12 | 3,31E-05 | 0,000647386 | Podn,Cx3cr1,Dcl1,Sfrp1,Egfl7,Tie1,Abhd2,Ptprn,Stk24,Clic4,Igfbp5,Srf                                                                                                                                                                                                                                           |
| GO:0009370 | embryo development (BP)                                              | 16 | 3,57E-05 | 0,000690647 | Fzd4,Foxo3,Foxo1,Htt,Tgfb3,Grin2b,Psen1,Wnt5a,Mecp2,Hus1,Psen2,Notch1,Foxj2,Foxk1,Foxn3,Tgfb3                                                                                                                                                                                                                  |
| GO:0030182 | neuron differentiation (BP)                                          | 13 | 3,97E-05 | 0,000746299 | Brsk1,Hipk2,Lhx2,Pigt,Atp2b2,Psen1,Mecp2,Edn3,Notch1,Asc1,Emx2,Btg2,Nr4a2                                                                                                                                                                                                                                      |
| GO:0030198 | extracellular matrix organization (BP)                               | 14 | 5,01E-05 | 0,000920981 | Fn1,Fbln5,Tgfb2,Pdgfra,Npnt,Atp7a,Nr2e1,Apbb2,Sov9,Agt,Gfod2,Smarca4,A930038C07Rik,Foxf2                                                                                                                                                                                                                       |
| GO:0007409 | axonogenesis (BP)                                                    | 14 | 6,52E-05 | 0,00114792  | Brsk1,Dock7,Adcy1,Amigo1,Stk11,Kalrn,Ntng2,Ulk2,Fgfr2,Slitrk2,Notch1,Ulk1,Apc,Ptprz1                                                                                                                                                                                                                           |
| GO:0016567 | protein ubiquitination (BP)                                          | 19 | 6,85E-05 | 0,00119934  | Ube2l3,Tnk2,Cdc34,Trim9,Ube2o,Akt1,Arrb2,Tnfaiip1,Rnf182,Rnf31,Ubr4,Ube2q1,Wwp2,Smurf2,Klhl13,Socs7,Mgmn1,Klhl20,Herc2                                                                                                                                                                                         |
| GO:0006916 | anti-apoptosis (BP)                                                  | 18 | 7,60E-05 | 0,00129628  | Vegfb,Fn1,Bag3,Dapk1,Foxo1,Htt,Tbx3,Psen1,Nrg1,Rela,Psen2,Tgfa,Axl,Tcf7l2,Tek,Sod1,Hipk3,Mkl1                                                                                                                                                                                                                  |
| GO:0010976 | positive regulation of neuron projection development (BP)            | 11 | 8,49E-05 | 0,00144025  | Grn,Lyn,Cbfa2l2,Wnt5a,Ppp2r5b,Sec16a,Dcc,Epha3,A930038C07Rik,Ppp2r5d,Fgfr1                                                                                                                                                                                                                                     |
| GO:0008283 | cell proliferation (BP)                                              | 20 | 8,73E-05 | 0,00147378  | Ube2l3,Scrib,Cspg4,Crebbp,Purb,Ennep,Csf1,Gm606,Ppard,Nrg1,Stat3,Lrp1,Kat2a,Pura,Entpd5,Furin,Tcf7l2,Egfr,Src,Map3k11                                                                                                                                                                                          |
| GO:0006629 | lipid metabolic process (BP)                                         | 25 | 0,000102 | 0,00168612  | Picd3,Srebf2,Acox3,Gm2a,Picg1,Cpt1c,Picd4,Lrp10,Slc27a1,Adipor2,Fads1,Fads2,Ppard,Picb3,Mbtps1,Pice1,Scap,Naaa,Adipor1,Plch2,Srebf1,Acsf2,Cpt1a,Leal,Serin5                                                                                                                                                    |
| GO:0006914 | autophagy (BP)                                                       | 10 | 0,000157 | 0,00236813  | Abi1,S430411K18Rik,Stk11,Psen1,Npc1,Ulk2,Ulk1,Arb,Wip1,1700021K19Rik                                                                                                                                                                                                                                           |
| GO:0006200 | ATP catabolic process (BP)                                           | 26 | 0,000167 | 0,00245209  | Erc3,Ddx17,Atp10a,Atp11a,1300010F03Rik,Dync2h1,Myo1c,Ddx21,Atp7a,Abcb1a,0610007P08Rik,Atp2b2,Uplf1,Snmp200,Smarca11,Entpd1,Abca1,Atp1b2,Chd4,Abca2,Atp13a2,Atp13a1,Smarca4,Lonf3,Abcg1,Dync1h1                                                                                                                 |
| GO:0006974 | response to DNA damage stimulus (BP)                                 | 30 | 0,000206 | 0,00292442  | Brsk1,Erc3,Nipbl,Ints3,Huwe1,Abi1,Hipk2,Ncoo6,Lyn,Strai13,Foxo1,Stk11,Dcra1b,Ubr5,0610007P08Rik,Obfc2b,Ino80D,Psen1,Nfatc2,Hus1,Mcrs1,Alkbh3,Taok2,Apc,Gnl1,Rad9,Herc2,Zfyve26,Btg2,H2afk                                                                                                                      |
| GO:0008203 | cholesterol metabolic process (BP)                                   | 10 | 0,000398 | 0,0049909   | Lrp5,Srebf2,Cln6,Mbtps1,Abca1,Abca2,Scap,Abcg1,Srebf1,Lcat                                                                                                                                                                                                                                                     |
| GO:0007049 | cell cycle (BP)                                                      | 43 | 0,000682 | 0,00744729  | Urgcn,Cdc34,Brsk1,Nipbl,Usp2,Clasp1,Ick,Pkmyr1,Cd2ap,Stk11,Cenpv,Anln,Arhgef2,Uplf1,Cdc14a,Mapk4,Gm606,Nek9,Ddit3,Mli5,Wdr6,Cul7,Ppm1d,Pard6,Suv39h1,Klhl13,Cdk16,Tp53bp2,Star1d3,Chmp1a,Pard3,Hcfc1,Anapc1,Nek6,Rassf2,Rab11b,Cdc26,Cdkn1b,Zfyve26,Scn,Ncapd3,H2afk,Foxn3                                     |
| GO:0055114 | oxidation-reduction process (BP)                                     | 48 | 0,000763 | 0,00820224  | Rdh10,Mttr,Dhdk,Kdm4a,Aldh18a1,Alkbh5,Hsd12,Sqrdl,Acox3,Phgdh,Fmo1,Alhd1l1,Tet1,Dhtkd1,Dio2,Moxd1,Txnd12,Gliad2,Ctbp2,Plod3,Phf2,Smox,Pvcox1,Cyp2j9,Cyrc,Cyp4f1,Vat1,Cybs5r3,Fads2,Gpx8,Kdm4c,Ctbp1,Jhdm1d,Egln1,Kdm3b,Alkbh3,Gfod2,Hsd17b11,Cyp2d22,Gldc,573600M10Rik,Fasn,Sod1,Decr2,Ppox,Suox,Cyp4f16,Kdm4b |
| GO:0006417 | regulation of translation (BP)                                       | 12 | 0,000999 | 0,00998364  | Tnrc6a,Eif2c2,Akt1,Eif4g3,Zfp361l,Mknk2,Mif4gd,Pum1,Akt2,Tnrc6e,Eif2c1,Aco1                                                                                                                                                                                                                                    |

|            |                                     |    |          |           |                                                                                                                                                                                                                                                                            |
|------------|-------------------------------------|----|----------|-----------|----------------------------------------------------------------------------------------------------------------------------------------------------------------------------------------------------------------------------------------------------------------------------|
| GO:0006887 | exocytosis (BP)                     | 10 | 0,002007 | 0,0161596 | Rims1,Unc13a,Arfgef2,Syt12,Unc13c,Llg1,Scamp5,Snap23,Cadps,Srcin1                                                                                                                                                                                                          |
| GO:0016042 | lipid catabolic process (BP)        | 11 | 0,002223 | 0,0175101 | Plcd3,Plcg1,Plcd4,Pla2g5,Pld2,Abhd4,Plcb3,Plce1,Pla2g16,Pla2g4e,Plch2                                                                                                                                                                                                      |
| GO:0051291 | protein heterooligomerization (BP)  | 10 | 0,002478 | 0,0179404 | Casp8,Tsc2,Stk11,Ikk,Akap2,Kcnh6,Hr,Lims1,Med24,Parva                                                                                                                                                                                                                      |
| GO:0006508 | proteolysis (BP)                    | 42 | 0,002965 | 0,0206579 | Sec11a,Josd1,Jmmp1l,Bace1,Adamts1,Casp8,Usp2,Mmp14,Tinag1,Adam11,Dpp9,Enpep,Bmp1,Adam15,Pm20d1,Tpp1,Bap1,Adamts10,Usp20,Psen1,Usp32,Mbtps1,Adamts9,Ece1,Casp2,3110056003Rik,Pcsk6,Mmp15,Psen2,Anpep,H13,Ctsa,Otd7a,Lonrf3,Furin,Rhbd1,Capn2,Usp31,Senp1,Qcct,Usp30,Adamts3 |
| GO:0005975 | carbohydrate metabolic process (BP) | 17 | 0,004368 | 0,0276916 | Kl,Idua,Pygm,Akt1,B4gal2,A1464131,Man2a2,Akt2,Gne,Gsk3a,Mlec,Gbe1,Chst1,Igf2,Phkb,Man2b2,Chi3l1                                                                                                                                                                            |
| GO:0007010 | cytoskeleton organization (BP)      | 10 | 0,006865 | 0,0356599 | Zmym3,Dlc1,Diap1,Svil,Raf1,Mast1,Fgd1,Limd1,Tnik,Pdzd8                                                                                                                                                                                                                     |
| GO:0032259 | methylation (BP)                    | 15 | 0,009204 | 0,0447889 | Dnmt1,Aldh1l1,Prmt5,Setd2,Pemt,Ash1l,Tyms,Mll1,Mll5,Nsun3,Suv39h1,Setd1b,Nsd1,Mll2,Dnmt3a                                                                                                                                                                                  |

Table S3

KEGG PATHWAY ANALYSIS OF DOWN-REGULATED GENES IN THE PFC OF DA-D2RKO MICE

| Items      | Items_Details                                        | Support | pvalue      | corrected pvalue | Genes                                                                                                                                                                                                                                                                                                          |
|------------|------------------------------------------------------|---------|-------------|------------------|----------------------------------------------------------------------------------------------------------------------------------------------------------------------------------------------------------------------------------------------------------------------------------------------------------------|
| Kegg-04010 | MAPK signaling pathway                               | 48      | 1.32E-15    | 1.24E-13         | Rela,Pdgfra,Taok2,Gna12,Cacna1c,Arhb2,Ngf,Gng12,Fgfr2,Dusp22,Srf,Ddit3,Cacnb1,Cacna1l,Dusp10,Sos2,Mapk8ip2,Cacng4,Rapgef2,Max,Map3k7,Pla2g4e,Raf1,Prkca,Rps6ka2,Egfr,Cacng7,Nlk,Tab2,Map4k2,Nfatc2,Mknk2,Tgfb3,Dusp8,Map4k4,Cacna1e,Map3k11,Cacnb3,Prkx,Akt2,Pdgfrb,Fgfr1,Akt1,Pla2g5,Tgfb2,Map3k12,Pom1a,Pak2 |
| Kegg-04520 | Adherens junction                                    | 23      | 1.60E-13    | 1.00E-11         | Wasf2,Lef1,Ptprm,Crebbp,Insr,Pvr1l,Tjp1,Smad3,Map3k7,Tcf7,Ptprb,Yes1,Pvr3,Src,Egfr,Nlk,Par3,Sorbs1,Fyn,Tcf7l2,Fgfr1,Mllt4,Tcf7l1                                                                                                                                                                               |
| Kegg-04310 | Wnt signaling pathway                                | 31      | 4.80E-12    | 2.26E-10         | Fzd4,Lef1,Ppp2r5d,Crebbp,Ppp2r5b,Plcb3,Apc,Smad3,Fzd3,Sfrp1,Map3k7,Tcf7,Paard,Apc2,Lrp5,Prkca,Nfatc3,Ctbp1,Nlk,Dvl3,Nfatc2,Vangl2,Ctbp2,Prkx,Wnt5a,Tcf7l2,Lrp6,Dvl2,Psen1,Daam2,Tcf7l1                                                                                                                         |
| Kegg-04360 | Axon guidance                                        | 28      | 1.80E-11    | 6.78E-10         | Unc5c,Srgap3,Rgs3,Arhgef12,Ephb4,Efnb1,Sema4f,Slit3,Nck2,Sema3c,Plxnb2,Plxnb1,Limk1,Plxnb3,Sema3f,Nfatc3,Srgap1,Sema6a,L1cam,Nfatc2,Epha3,Plkna3,Plkna1,Abl1,Robo1,Fyn,Dcc,Pak2                                                                                                                                |
| Kegg-04724 | Glutamatergic synapse                                | 27      | 2.58E-11    | 8.09E-10         | Pld2,Itrp2,Cacna1c,Slc38a3,Pld1,Gng12,Gng7,Plcb3,Shank3,Adcy5,Grin2c,Pla2g4e,Slc1a3,Prkca,Grm2,Grik5,Homer2,Adcy1,Slc38a1,Prkx,Grin2b,Grik2,Grm4,Pla2g5,Grin2d,Dlg4,Grin1                                                                                                                                      |
| Kegg-04810 | Regulation of actin cytoskeleton                     | 35      | 1.64E-10    | 4.39E-09         | Pdgfra,Arhgef12,Fgd1,Wasf2,Gna12,Gng12,Fgfr2,Cyfp1,Igfbp8,Apc,Sos2,Cyfp2,Tiam1,Limk1,Apc2,Dock1,Raf1,Chrm1,Enah,Egfr,Pip4k2b,Msn,Slc9a1,Arhgef6,Igfa6,Diap1,Fn1,Gna13,Pdgfrb,Diap2,Ssh1,Fgfr1,Igav,Igta4,Pak2                                                                                                  |
| Kegg-04330 | Notch signaling pathway                              | 15      | 5.18E-09    | 1.22E-07         | Ncor2,Crebbp,Notch1,Notch3,Jaag2,Aph1a,Katza,Mam13,Ctbp1,Dvl3,Psen2,Ctbp2,Notch2,Dvl2,Psen1                                                                                                                                                                                                                    |
| Kegg-04510 | Focal adhesion                                       | 31      | 7.47E-09    | 1.56E-07         | Pdgfra,Parva,Lamb2,Parvb,Igfbp8,Lama3,Capn2,Sos2,Vegfb,Fit1,Tln2,Dock1,Raf1,Prkca,Src,Egfr,Igta6,Rapgef1,Diap1,Tln1,Fn1,Lama2,Akt2,Pdgfrb,Fyn,IkK,Igav,Akt1,Igta4,Shc3,Pak2                                                                                                                                    |
| Kegg-04144 | Endocytosis                                          | 32      | 1.06E-08    | 2.00E-07         | Pdgfra,Pld2,Erbb4,Arhb2,Pld1,Fgfr2,Ps0,Arf6,Agap1,Rab11fip5,Rab5b,Dab2,Fit1,Smad3,Chmp1a,Kit,Vps37c,Src,Ap2a1,Par6g,Egfr,Par3,Rab11b,Dnm2,Epn1,Tgfb3,Acap2,Iqsec1,Iqsec2,Smurf2,Tgfb2,Pml                                                                                                                      |
| Kegg-04012 | ErbB signaling pathway                               | 19      | 2.41E-08    | 4.13E-07         | Erbb4,Nrg1,Sos2,Cdk1b,Nck2,Plg1,Stat5b,Raf1,Mtor,Prkca,Src,Egfr,Tgfa,Gab1,Akt2,Abl1,Akt1,Shc3,Pak2                                                                                                                                                                                                             |
| Kegg-04666 | Fc gamma R-mediated phagocytosis                     | 18      | 1.35E-07    | 1.59E-06         | Pld2,Myo10,Lyn,Wasf2,Pld1,Arf6,Ppap2b,Fcgr2b,Pla2g4e,Limk1,Plg1,Raf1,Prkca,Dnm2,Akt2,Gab2,Inpp5d,Akt1                                                                                                                                                                                                          |
| Kegg-04020 | Calcium signaling pathway                            | 26      | 2.74E-07    | 3.03E-06         | Pdgfra,Itrp2,Erbb4,Cacna1c,Atg2b2,Cacna1l,Plcb3,Plcd3,Itpkb,Grin2c,Ednrn,Plcg1,Chrm1,Phkb,Prkca,Egfr,F2r7,Adcy1,Ryr2,Cacna1e,Prkx,Pdgfrb,Plce1,Plcd4,Grin2d,Grin1                                                                                                                                              |
| Kegg-04910 | Insulin signaling pathway                            | 22      | 4.89E-07    | 5.11E-06         | Foxo1,Insr,Sos2,Flot2,Srebf1,Inpp5k,Raf1,Phkb,Mtor,Mknk2,Sh2b2,Rapgef1,Gys1,Sorbs1,Prkx,Fasn,Akt2,Inpp5d,Akt1,Tsc2,Shc3,Pygm                                                                                                                                                                                   |
| Kegg-04722 | Neurotrophin signaling pathway                       | 20      | 2.43E-06    | 1.83E-05         | Rela,Ngf,Wfah,Sos2,Plcg1,Raf1,Rps6ka2,Sh2b1,Irak2,Nfkb1,Sh2b2,Rapgef1,Gab1,Foxo3,Psen2,Akt2,Abl1,Akt1,Psen1,Shc3                                                                                                                                                                                               |
| Kegg-04062 | Chemokine signaling pathway                          | 24      | 4.48E-06    | 3.12E-05         | Rela,Lyn,Arhb2,Gng12,Gng7,Plcb3,Sos2,Adcy5,Tiam1,Stat5b,Raf1,Iak2,Nrkb1,Par3,Cx3cr1,Adcy1,Foxo3,Prkx,Prex1,Akt2,Akt1,Stat3,Shc3,Gsk3a                                                                                                                                                                          |
| Kegg-04514 | Cell adhesion molecules (CAMs)                       | 21      | 4.92E-06    | 3.30E-05         | Sdc4,Nlgn2,Ptprm,Igfbp8,Esam,Pvr1l,Cadm1,Vcan,Nrxn2,Pvr1b,L1cam,Sdc3,Igfa6,Glg1,Nrxn3,Jam2,Pecam1,Igav,Igta4,Cdh5,Ncam1                                                                                                                                                                                        |
| Kegg-04912 | GnRH signaling pathway                               | 16      | 1.11E-05    | 6.75E-05         | Pld2,Itrp2,Cacna1c,Mmp14,Pld1,Plcb3,Sos2,Adcy5,Pla2g4e,Raf1,Prkca,Src,Egfr,Adcy1,Prkx,Pla2g5                                                                                                                                                                                                                   |
| Kegg-04070 | Phosphatidylinositol signaling system                | 14      | 1.16E-05    | 6.80E-05         | Itrp2,Plcb3,Plcd3,Dgkz,Itpkb,Inpp5k,Plcg1,Inpp4a,Prkca,Pip4k2b,Dgki,Plce1,Plcd4,Inpp5d                                                                                                                                                                                                                         |
| Kegg-00564 | Glycerophospholipid metabolism                       | 14      | 2.49E-05    | 0.000141685      | Pld2,Lcat,Pld1,Agpat2,Ppap2b,Taz,Dgkz,Poy1a,Pla2g4e,Lpcat4,Dgki,Pemt,Ptdss2,Pla2g5                                                                                                                                                                                                                             |
| Kegg-04120 | Ubiquitin mediated proteolysis                       | 19      | 2.80E-05    | 0.000150419      | Ube4a,Wwp2,Ubr5,Ube2r2,Huwe1,Cul7,Herc2,Anapc1,Ube2q1,Khlh13,Cdc34,Mgrn1,Ube2o,Cdc26,Plas3,Ube3b,Smurf2,Pml,Ube2l3                                                                                                                                                                                             |
| Kegg-04540 | Gap junction                                         | 14      | 5.72E-05    | 0.000268955      | Pdgfra,Itrp2,Plcb3,Sos2,Tjp1,Adcy5,Prkg2,Raf1,Prkca,Src,Egfr,Adcy1,Prkx,Pdgfrb                                                                                                                                                                                                                                 |
| Kegg-03320 | PPAR signaling pathway                               | 13      | 9.30E-05    | 0.000426388      | Cpt1a,Rxra,Rxrb,Fads2,Paard,Acox3,Sorbs1,Pltp,Hmgcs2,Ik,Fabp7,Slc27a1,Cpt1c                                                                                                                                                                                                                                    |
| Kegg-04530 | Tight junction                                       | 17      | 0.000199893 | 0.00087395       | Tjp2,Epb4.1B,Tjp1,Lgl1,Epb4.1L1,Yes1,Prkca,Src,Epb4.1I2,Par6g,Par3,Jam2,Magi1,Akt2,Ash1,Akt1,Mllt4                                                                                                                                                                                                             |
| Kegg-04340 | Hedgehog signaling pathway                           | 10      | 0.000217309 | 0.000928502      | Smo,Bmp6,Csnk1g2,Sufu,Bmp7,Ptch1,Prkx,Gli3,Wnt5a,Zic2                                                                                                                                                                                                                                                          |
| Kegg-04320 | Dorso-ventral axis formation                         | 6       | 0.000463107 | 0.0018927        | Notch1,Notch3,Sos2,Egfr,Notch2,Ets1                                                                                                                                                                                                                                                                            |
| Kegg-04512 | ECM-receptor interaction                             | 12      | 0.000811741 | 0.00311444       | Sdc4,Lamb2,Igfbp8,Lama3,Npnt,Agrn,Sdc3,Igfa6,Fn1,Lama2,Igav,Igta4                                                                                                                                                                                                                                              |
| Kegg-04150 | mTOR signaling pathway                               | 9       | 0.000862236 | 0.00324201       | Vegfb,Stk11,Mtor,Rps6ka2,Ulk1,Akt2,Ulk2,Akt1,Tsc2                                                                                                                                                                                                                                                              |
| Kegg-00534 | Glycosaminoglycan biosynthesis - heparan sulfate     | 6       | 0.00121214  | 0.00429968       | B3gat3,B3gat1,Ext1l1,Ndst2,Hs6st3,Hs6st2                                                                                                                                                                                                                                                                       |
| Kegg-00562 | Inositol phosphate metabolism                        | 9       | 0.00147455  | 0.00513361       | Plcb3,Plcd3,Itpkb,Inpp5k,Plcg1,Inpp4a,Pip4k2b,Plce1,Plcd4                                                                                                                                                                                                                                                      |
| Kegg-04730 | Long-term depression                                 | 10      | 0.00180047  | 0.00615435       | Itrp2,Lyn,Gna12,Plcb3,Prkg2,Pla2g4e,Raf1,Prkca,Gna13,Pla2g5                                                                                                                                                                                                                                                    |
| Kegg-00310 | Lysine degradation                                   | 8       | 0.00214458  | 0.00707335       | Mll1,Mll5,Nsd1,Setd2,Mll2,Plod3,Suv39h1,Ash1l                                                                                                                                                                                                                                                                  |
| Kegg-02015 | mRNA surveillance pathway                            | 11      | 0.00244438  | 0.00778886       | Hs1l,Cpsf7,Ppp2r5d,Ppp2r5b,Srm1,Cpsf4,Pabpc6,Hs1l,Ugpf1,Cpsf6,Smg5                                                                                                                                                                                                                                             |
| Kegg-05010 | Alzheimer's disease                                  | 17      | 0.0028668   | 0.0089264        | Bace1,Casp8,Itrp2,Cacna1c,Lrp1,Capn2,Plcb3,Grin2c,Aph1a,Atg5g3,Sdhc,Psen2,Ern1,Grin2b,Grin2d,Psen1,Grin1                                                                                                                                                                                                       |
| Kegg-04370 | VEGF signaling pathway                               | 10      | 0.00303282  | 0.00934707       | Pla2g4e,Plg1,Raf1,Prkca,Src,Nfatc3,Nfatc2,Akt1,Akt1,Pla2g5                                                                                                                                                                                                                                                     |
| Kegg-00565 | Ether lipid metabolism                               | 6       | 0.00510557  | 0.0145431        | Pld2,Itrp2,Ppap2b,Pla2g4e,Lpcat4,Pla2g5                                                                                                                                                                                                                                                                        |
| Kegg-04350 | TGF-beta signaling pathway                           | 10      | 0.00686473  | 0.0187039        | Bmp6,Crebbp,Smad3,Sp1,Bmpr1a,Bmp7,Itpb1,Tgfb3,Smurf2,Tgfb2                                                                                                                                                                                                                                                     |
| Kegg-00510 | N-Glycan biosynthesis                                | 7       | 0.00945798  | 0.0243575        | B4gal2,Mgat5b,Man2a2,Alg3,Dpaqt1,Alg1,Alg12                                                                                                                                                                                                                                                                    |
| Kegg-00592 | alpha-Linolenic acid metabolism                      | 4       | 0.0114589   | 0.0291118        | Fads2,Acox3,Pla2g4e,Pla2g5                                                                                                                                                                                                                                                                                     |
| Kegg-00514 | Other types of O-glycan biosynthesis                 | 6       | 0.0144013   | 0.0351617        | B4gal2,Mgat5b,Gylt1,Plod3,St3gal3,Pomt2                                                                                                                                                                                                                                                                        |
| Kegg-04142 | Lysosome                                             | 12      | 0.0143662   | 0.0355375        | Ctsa,Atg6v0a2,Npc2,Arb,Ap3d1,Npc1,Idua,Cd164,Abca2,Gm2a,Igf2r,Tpp1                                                                                                                                                                                                                                             |
| Kegg-04621 | NOD-like receptor signaling pathway                  | 7       | 0.0171588   | 0.0408336        | Rela,Casp8,Erbb2lp,Map3k7,Nfkb1,Tab2,Card6                                                                                                                                                                                                                                                                     |
| Kegg-00532 | Glycosaminoglycan biosynthesis - chondroitin sulfate | 4       | 0.0193002   | 0.0447956        | B3gat3,Ust,B3gat1,Chsy1                                                                                                                                                                                                                                                                                        |

Kegg:02010 ABC transporters  
Kegg:04210 Apoptosis

6 0,0198174  
9 0,0205786

0,0454351 Abcg4,Abca9,Abcb1a,Abca1,Abca2,Abcg1  
0,0466117 Rela,Casp8,Myd88,Ngf,Capn2,Irak2,Prkx,Akt2,Akt1
