# Supplementary material
Source: PubMed Central journal article supplement (PMC4211954)
Supplement: NIHMS597313-supplement-5.pdf [file NIHMS597313-supplement-5.pdf]

**Table S4 GENE ONTOLOGY ANALYSIS OF UP OR DOWN-REGULATED GENES IN THE vStr OF DA-D2RKO MICE**

| Items      | Items_Details                                   | Support | pvalue     | corrected pvalue | Genes                                                                                    |
|------------|-------------------------------------------------|---------|------------|------------------|------------------------------------------------------------------------------------------|
| GO:0006355 | regulation of phosphorylation (BP)              | 4       | 8,14E-06   | 0,00434603       | Dapp1,Ppp1r14b,Mcm7,Ctd24a                                                               |
| GO:0006351 | cell cycle (BP)                                 | 9       | 6,70E-05   | 0,00894199       | Smc4,Mad2l1,Cdc14a,Esco2,Tpx2,Mcm7,Dusp1,Nuf2,Sgol2                                      |
| GO:0008284 | dephosphorylation (BP)                          | 4       | 0,00330499 | 0,0339398        | Ptpn3,Cdc14a,Dusp4,Dusp1                                                                 |
| GO:0010951 | oxidation-reduction process (BP)                | 7       | 0,00423294 | 0,041098         | Akr1e1,Cyp39a1,Hsd17b7,Rrm1,Gpx8,Acadsb,Dhfr                                             |
| GO:0045087 | regulation of transcription, DNA-dependent (BP) | 15      | 0,00055482 | 0,0423753        | Med21,Zfp182,Hmg5,Prrx1,Ezh2,Etv1,Zfp654,Pou3f2,Mycn,Zik1,Actl6a,Zfp652,Sox11,Nr4a1,Tmpo |
| GO:0000084 | mitosis (BP)                                    | 4       | 0,00474646 | 0,0452608        | Smc4,Mad2l1,Tpx2,Nuf2                                                                    |
| GO:0001756 | DNA recombination (BP)                          | 3       | 0,00151972 | 0,054102         | Smc4,Actl6a,Xrcc4                                                                        |
| GO:0050766 | induction of apoptosis (BP)                     | 3       | 0,0167425  | 0,0592086        | Trp53inp1,Bik,Nr4a1                                                                      |
| GO:0010165 | lipid metabolic process (BP)                    | 3       | 0,00304304 | 0,0773802        | Ptpn3,Cdc14a,Dusp1                                                                       |
| GO:0010332 | lipid metabolic process (BP)                    | 3       | 0,0385498  | 0,0782721        | Cyp39a1,Plc44,Acadsb                                                                     |
| GO:0006956 | ATP catabolic process (BP)                      | 3       | 0,0479452  | 0,0876807        | Ide,Myo7a,Pex1                                                                           |
| GO:0006807 | DNA repair (BP)                                 | 3       | 0,0513049  | 0,0913226        | Smc4,Actl6a,Xrcc4                                                                        |

**Table S4** KEGG PATHWAY ANALYSIS OF UP OR DOWNREGULATED GENES IN THE VStr OF DA-D2RKO MICE

| Items      | Items_Details          | Support | pvalue    | corrected pvalue | Genes              |
|------------|------------------------|---------|-----------|------------------|--------------------|
| Kegg:04010 | MAPK signaling pathway | 3       | 0,0552808 | 0,0552808        | Nr4a1,Dusp1,Dusp4  |
| Kegg:04110 | Cell cycle             | 3       | 0,0077275 | 0,015455         | Mad2l1,Cdc14a,Mcm7 |
